# Supplementary material for: Transcriptomic Analysis of Hepatitis B Infected Liver for Prediction of Hepatocellular Carcinoma
Source: MDPI journal article supplement (doi:10.3390/biology12020188), 2023-01-26
Supplement: s1 [file s1]

## Common probesets and genes identified in GSE83148 and GSE84044

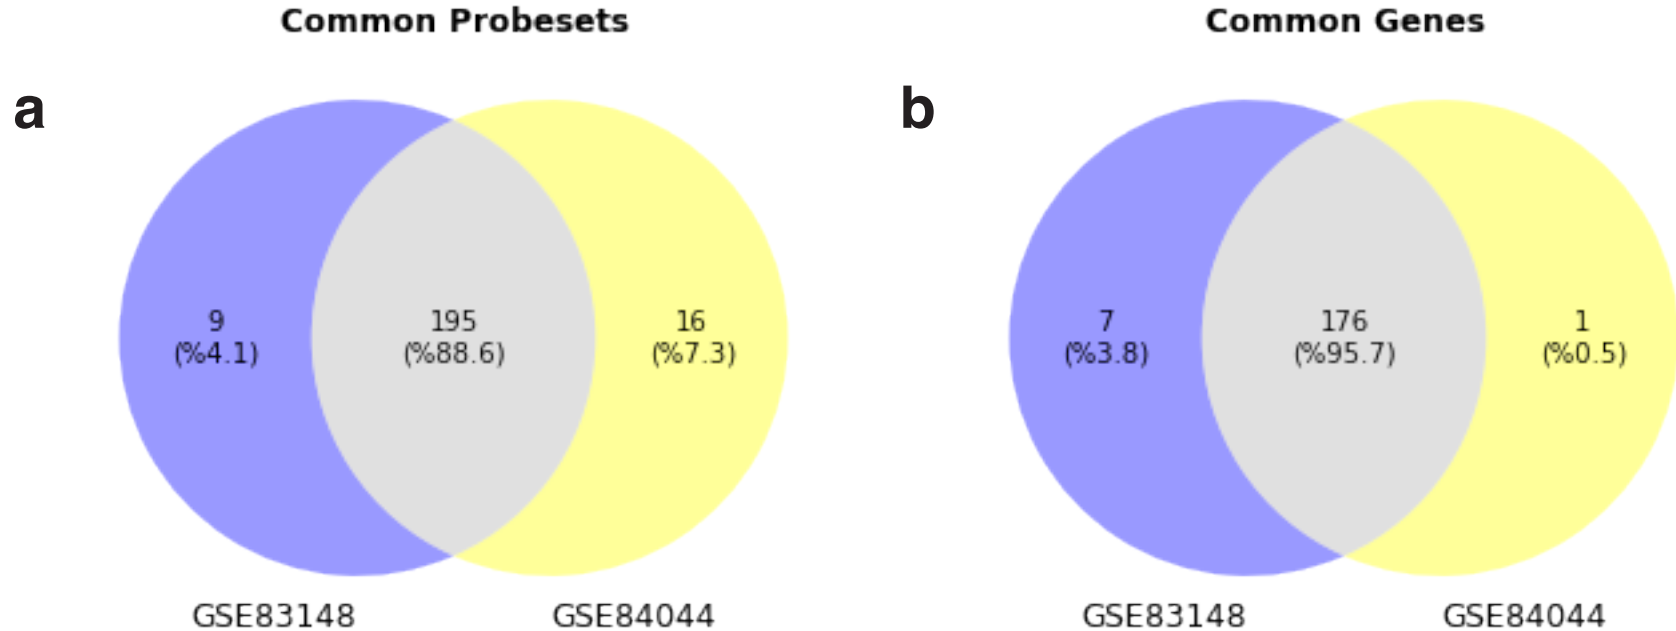

**Supplementary Figure S2:** Venn diagrams showing overlap of probesets (a) and genes (b) identified based on independent datasets (PCM1).
