# Supplementary material for: Transcriptomic Analysis of Hepatitis B Infected Liver for Prediction of Hepatocellular Carcinoma
Source: MDPI journal article supplement (doi:10.3390/biology12020188), 2023-01-26
Supplement: s1 [file s1]

# Enrichment of liver cancer related gene sets in PCM1-U

a

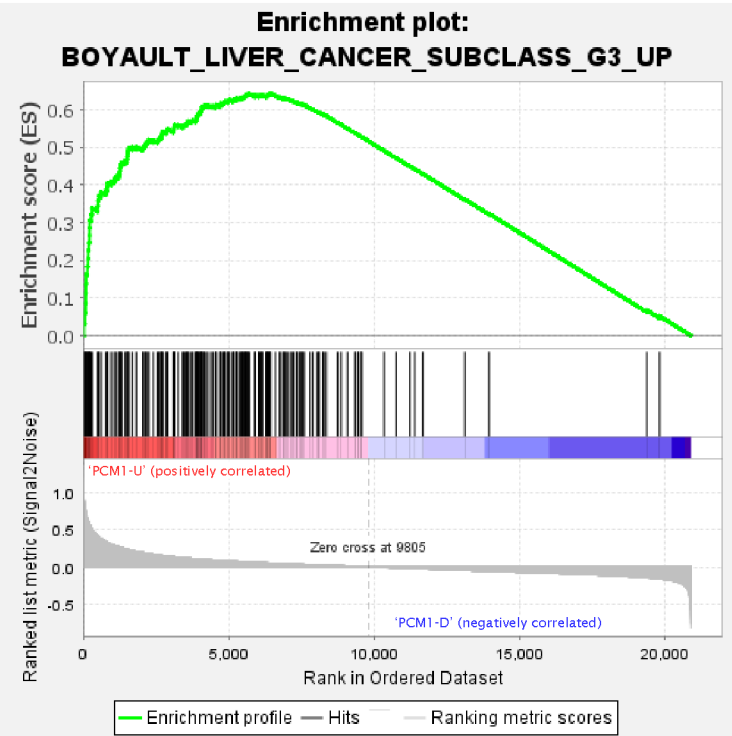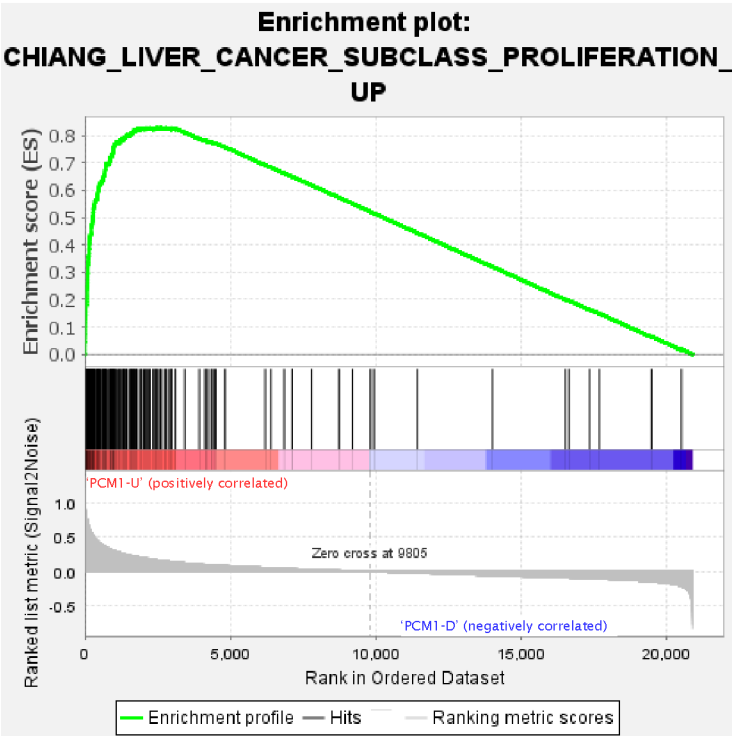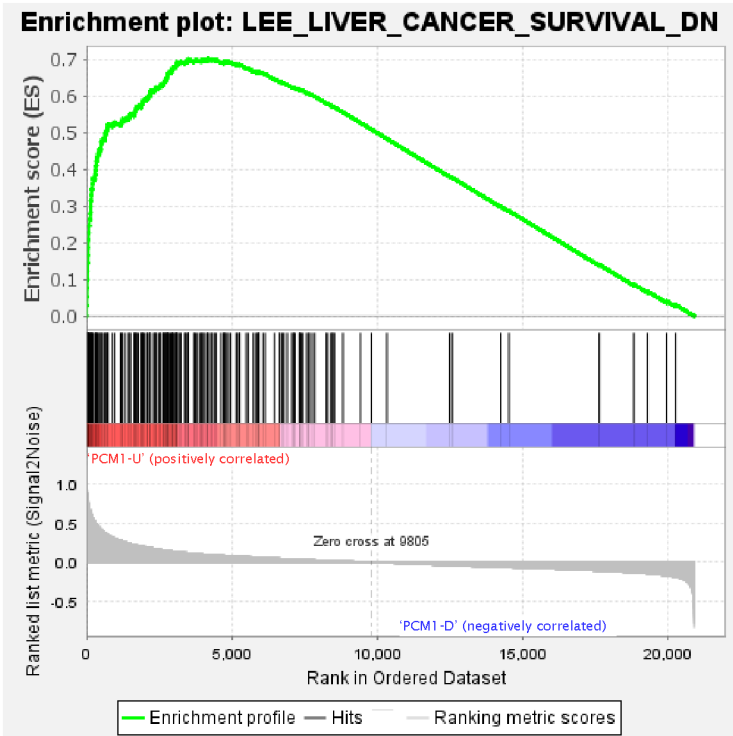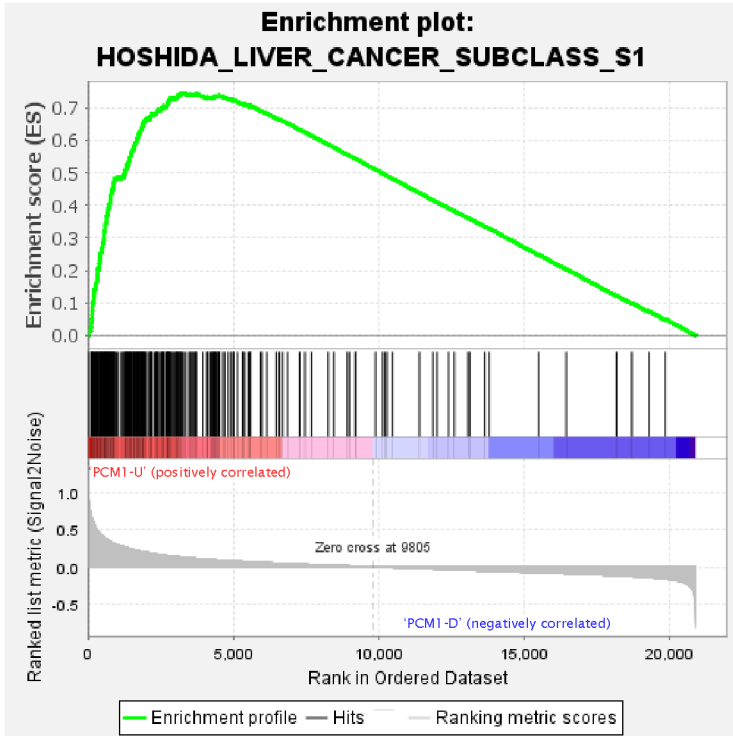

b

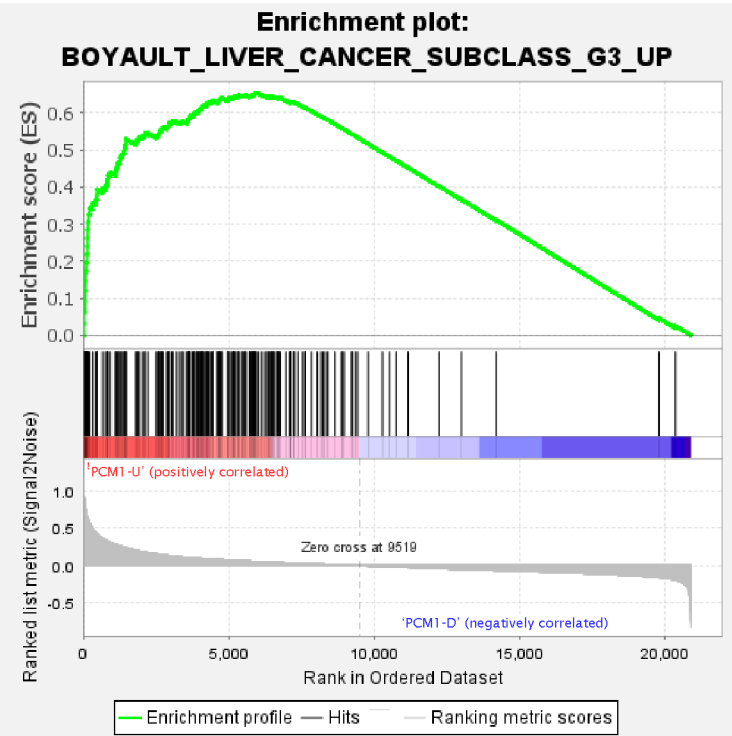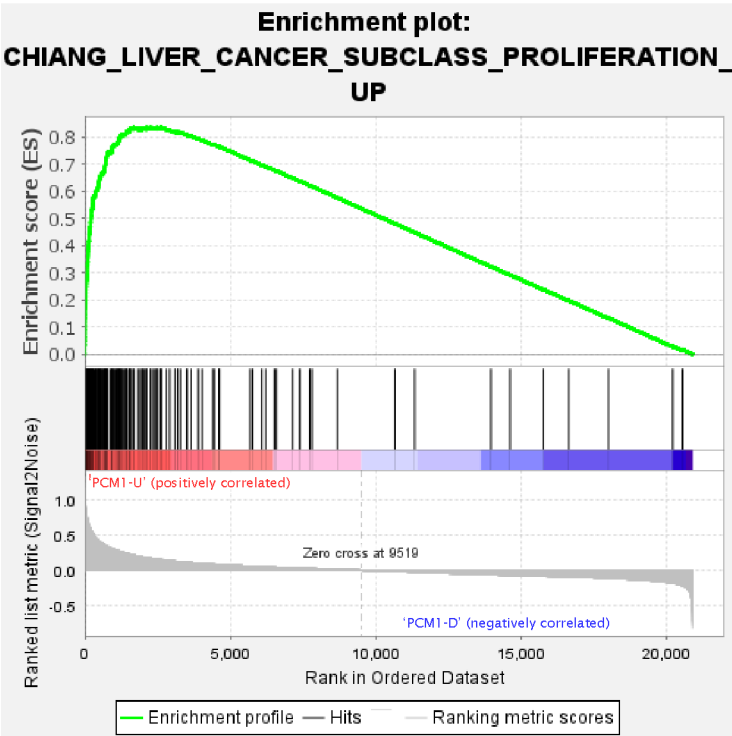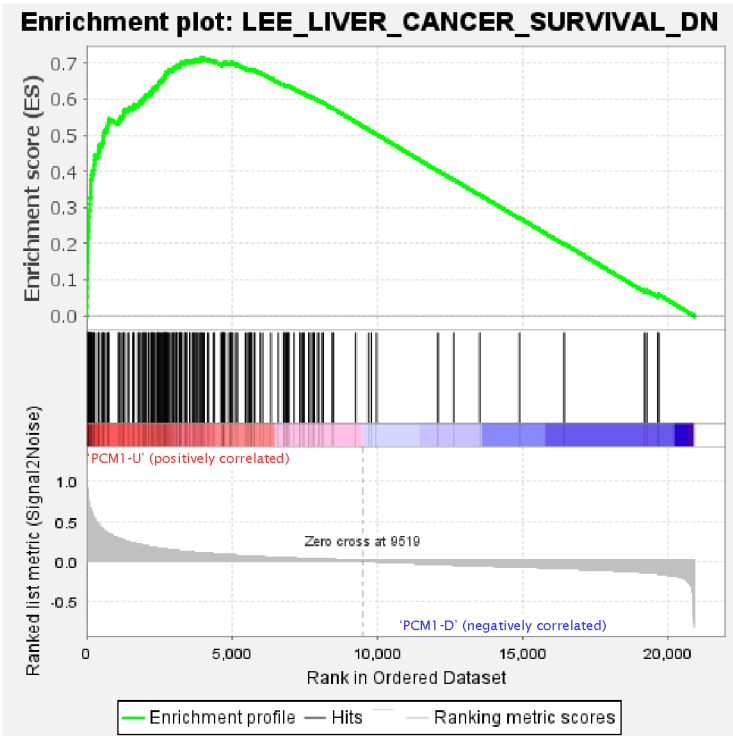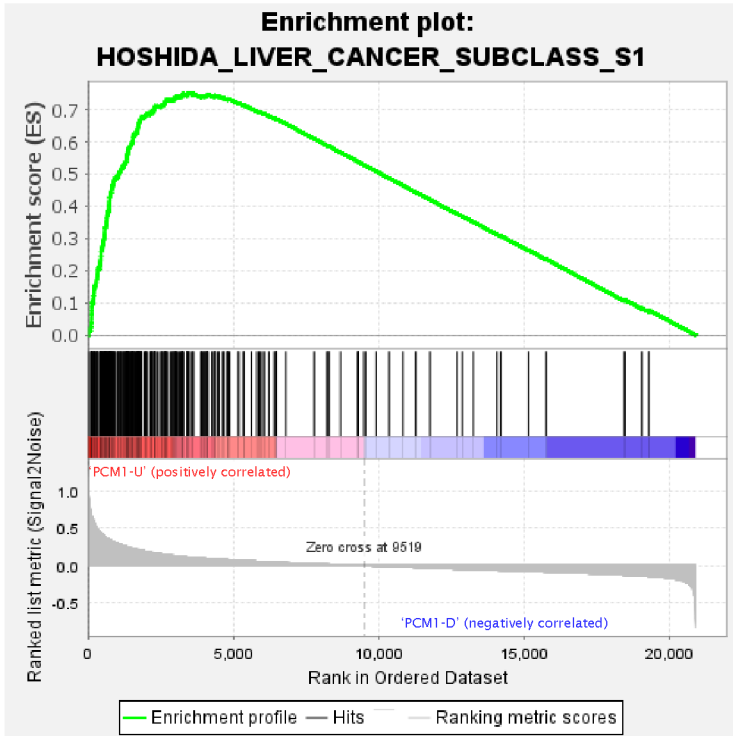

**Supplementary figure S6:** Enrichment plots of the curated liver cancer related gene sets in GSE83148 (a) and GSE84044 (b). PCM1-U and PCM1-D groups were compared.
