# Supplementary material for: Transcriptomic Analysis of Hepatitis B Infected Liver for Prediction of Hepatocellular Carcinoma
Source: MDPI journal article supplement (doi:10.3390/biology12020188), 2023-01-26
Supplement: s1 [file s1]

**Supplementary Table S1:** Relationship with Scheuer score in GSE84044

|        | Scheuer Score / Necroinflammatory Activity |        |          |        |          |        |          |        |          |       | p-value |
|--------|--------------------------------------------|--------|----------|--------|----------|--------|----------|--------|----------|-------|---------|
|        | Grade 0                                    |        | Grade 1  |        | Grade 2  |        | Grade 3  |        | Grade 4  |       |         |
|        | <i>n</i>                                   | %      | <i>n</i> | %      | <i>n</i> | %      | <i>n</i> | %      | <i>n</i> | %     |         |
| PCM1-D | 36                                         | 40.90% | 28       | 31.80% | 19       | 21.60% | 3        | 3.40%  | 2        | 2.30% | <0.001  |
| PCM1-U | 1                                          | 2.80%  | 5        | 13.90% | 15       | 41.70% | 12       | 33.30% | 3        | 8.30% |         |

Grade 0: portal/periportal activity (PPA) none or minimal, lobular activity (LA) none; Grade 1: PPA portal inflammation, LA inflammation but no necrosis; Grade 2: PPA mild piecemeal necrosis, LA focal necrosis or acidophil bodies; Grade 3: PPA moderate piecemeal necrosis, LA severe focal cell damage; Grade 4: PPA severe piecemeal necrosis, LA damage includes bridging necrosis

|        | Scheuer Score / Fibrosis and Cirrhosis |        |          |        |          |        |          |        |          |        | p-value |
|--------|----------------------------------------|--------|----------|--------|----------|--------|----------|--------|----------|--------|---------|
|        | Grade 0                                |        | Grade 1  |        | Grade 2  |        | Grade 3  |        | Grade 4  |        |         |
|        | <i>n</i>                               | %      | <i>n</i> | %      | <i>n</i> | %      | <i>n</i> | %      | <i>n</i> | %      |         |
| PCM1-D | 42                                     | 47.70% | 18       | 20.50% | 21       | 23.90% | 5        | 5.70%  | 2        | 2.30%  | <0.001  |
| PCM1-U | 1                                      | 2.80%  | 2        | 5.60%  | 12       | 33.30% | 13       | 36.10% | 8        | 22.20% |         |

Grade 0: Fibrosis (F) none; Grade 1: F enlarged, fibrotic portal tracts; Grade 2: F periportal or portal-portal septa but intact architecture; Grade 3: F fibrosis with architectural distortion but no obvious cirrhosis; Grade 4: F probable or definite cirrhosis

**Supplementary Table S2** Overrepresentation among 176 gene panel via PANTHER (biological process)

| GO <u>Biological Process</u> Complete                                   | GO ID      | Fold Enrichment | p value  |
|-------------------------------------------------------------------------|------------|-----------------|----------|
| regulation of mitotic metaphase/anaphase transition                     | GO:0030071 | 13.98           | 0.00822  |
| chemokine-mediated signaling pathway                                    | GO:0070098 | 13.2            | 0.00036  |
| neutrophil chemotaxis                                                   | GO:0030593 | 12.52           | 0.00307  |
| mitotic spindle organization                                            | GO:0007052 | 12.04           | 0.00413  |
| killing of cells of other organism                                      | GO:0031640 | 11.3            | 0.00659  |
| mitotic sister chromatid segregation                                    | GO:0000070 | 10.93           | 0.000361 |
| antimicrobial humoral immune response mediated by antimicrobial peptide | GO:0061844 | 10.12           | 0.00329  |
| cell cycle G1/S phase transition                                        | GO:0044843 | 8.41            | 0.015    |
| mitotic prometaphase                                                    | GO:0000236 | 6.81            | 0.0253   |
| mitotic cell cycle phase transition                                     | GO:0044772 | 5.38            | 0.0111   |
| cell division                                                           | GO:0051301 | 4.91            | 2.44E-05 |
| regulation of cell adhesion                                             | GO:0030155 | 3.47            | 0.00794  |
| response to bacterium                                                   | GO:0009617 | 3.29            | 0.0324   |
| regulation of cell population proliferation                             | GO:0042127 | 2.46            | 0.00547  |
| regulation of multicellular organismal development                      | GO:2000026 | 2.19            | 0.0212   |
| system development                                                      | GO:0048731 | 1.72            | 0.0152   |
| positive regulation of cellular process                                 | GO:0048522 | 1.6             | 0.0303   |

**Supplementary Table S3:** Cibersort based immune cell fractions

| Cell Type                         | GSE83148            |                 |      | GSE84044            |                 |      | GSE65359            |                 |      | RANKSUM*** |
|-----------------------------------|---------------------|-----------------|------|---------------------|-----------------|------|---------------------|-----------------|------|------------|
|                                   | Fold Dif.<br>(U-D)* | Adjusted<br>p** | Rank | Fold Dif.<br>(U-D)* | Adjusted<br>p** | Rank | Fold Dif.<br>(U-D)* | Adjusted<br>p** | Rank |            |
| <b>Macrophages M1</b>             | 0.114921            | 4.97E-12        | 1    | 0.104081            | 1.20E-11        | 1    | 0.094086            | 3.12E-06        | 1.5  | 3.5        |
| <b>T cells gamma delta</b>        | 0.074287            | 3.27E-05        | 3    | 0.072302            | 2.35E-06        | 2    | 0.083591            | 3.12E-06        | 1.5  | 6.5        |
| <b>T cells regulatory (Tregs)</b> | -0.02179            | 2.83E-05        | 2    | -0.0217             | 2.39E-05        | 4    | -0.02074            | 0.000456        | 3    | 9          |
| <b>Neutrophils</b>                | -0.0148             | 0.000224        | 5.5  | -0.01759            | 1.51E-05        | 3    | -0.01499            | 0.00371         | 4    | 12.5       |
| <b>Mast cells resting</b>         | -0.02742            | 7.16E-05        | 4    | -0.02007            | 0.000766        | 5    | -0.01907            | 0.018482        | 5.5  | 14.5       |
| <b>T cells CD4 naive</b>          | -0.02232            | 0.000224        | 5.5  | -0.0226             | 0.001022        | 6    | -0.024              | 0.018482        | 5.5  | 17         |
| <b>Mast cells activated</b>       | 0.016651            | 0.006123        | 7    | 0.015993            | 0.007288        | 10   | 0.021127            | 0.032138        | 7.5  | 24.5       |
| <b>T cells CD8</b>                | 0.031053            | 0.016941        | 12   | 0.045602            | 0.003301        | 7    | 0.039411            | 0.039486        | 9    | 28         |
| <b>Plasma cells</b>               | 0.017459            | 0.014917        | 11   | 0.019663            | 0.007288        | 10   | 0.023444            | 0.032138        | 7.5  | 28.5       |
| <b>T cells follicular helper</b>  | 0.015767            | 0.008299        | 8    | 0.013245            | 0.011093        | 12   | 0.013039            | 0.134801        | 10   | 30         |
| <b>NK cells activated</b>         | -0.01729            | 0.010251        | 10   | -0.01768            | 0.004743        | 8    | -0.0133             | 0.184301        | 12   | 30         |
| <b>Dendritic cells resting</b>    | 0.020762            | 0.008722        | 9    | 0.020295            | 0.007288        | 10   | 0.011482            | 0.232201        | 13.5 | 32.5       |
| <b>Macrophages M0</b>             | 0.013035            | 0.073013        | 13   | 0.014576            | 0.026025        | 13   | 0.014452            | 0.159462        | 11   | 37         |
| <b>Macrophages M2</b>             | 0.009749            | 0.184636        | 14   | 0.012304            | 0.086664        | 14   | 0.014553            | 0.232201        | 13.5 | 41.5       |
| <b>B cells naive</b>              | -0.00111            | 0.423248        | 15   | -0.00101            | 0.429288        | 15   | 0.000743            | 0.915693        | 15   | 45         |

Cell types with 0 fractions in more than %50 of the samples' were excluded

\*Fold difference was calculated by subtraction of mean fraction of PCM1-D group from mean fraction of PCM1-U group

\*\* Student's t-test based p values were adjusted using Benjamini Hochberg method.

\*\*\* "rank" indicates the rank of adjusted p value, "RANKSUM" is the sum of the ranks from three datasets

**Supplementary Table S4:** GSEA results of the curated liver cancer related gene sets between PCM1-U and PCM1-D groups

| Enriched Geneset Name                             | GSE83148 |          |           |           | GSE84044 |          |           |           |
|---------------------------------------------------|----------|----------|-----------|-----------|----------|----------|-----------|-----------|
|                                                   | ES       | NES      | NOM p-val | FDR q-val | ES       | NES      | NOM p-val | FDR q-val |
| SHETH_LIVER_CANCER_VS_TXNIP_LOSS_PAM2             | 0.661864 | 1.75598  | 0         | 0.005025  | 0.664639 | 1.774459 | 0         | 0         |
| SHETH_LIVER_CANCER_VS_TXNIP_LOSS_PAM1             | 0.534732 | 1.743875 | 0         | 0.003141  | 0.545578 | 1.763564 | 0         | 0.00063   |
| BOYALT_LIVER_CANCER_SUBCLASS_G3_UP                | 0.637219 | 1.66648  | 0         | 0.009228  | 0.646725 | 1.690628 | 0         | 0.002579  |
| LEE_LIVER_CANCER_SURVIVAL_DN                      | 0.699302 | 1.657646 | 0.00202   | 0.007408  | 0.709841 | 1.67129  | 0         | 0.003189  |
| LEE_LIVER_CANCER_E2F1_UP                          | 0.71679  | 1.660932 | 0.002024  | 0.008136  | 0.738627 | 1.721376 | 0         | 0.001759  |
| HOSHIDA_LIVER_CANCER_SUBCLASS_S1                  | 0.741411 | 1.638775 | 0         | 0.006771  | 0.744788 | 1.664884 | 0         | 0.003453  |
| MARTORIATI_MDM4_TARGETS_FETAL_LIVER_UP            | 0.42286  | 1.611421 | 0.004107  | 0.009433  | 0.428096 | 1.642822 | 0         | 0.004225  |
| HOSHIDA_LIVER_CANCER_SURVIVAL_UP                  | 0.776975 | 1.601924 | 0         | 0.009615  | 0.767106 | 1.622994 | 0         | 0.005642  |
| SHETH_LIVER_CANCER_VS_TXNIP_LOSS_PAM6             | 0.575014 | 1.617768 | 0.005929  | 0.009366  | 0.583005 | 1.612019 | 0.003899  | 0.005062  |
| VILLANUEVA_LIVER_CANCER_KRT19_UP                  | 0.704284 | 1.571792 | 0.004016  | 0.013037  | 0.715163 | 1.60189  | 0         | 0.0059    |
| HOSHIDA_LIVER_CANCER_LATE_RECURRENCE_UP           | 0.731084 | 1.585396 | 0.00198   | 0.010807  | 0.741896 | 1.632933 | 0         | 0.004946  |
| SERVITJA_LIVER_HNF1A_TARGETS_UP                   | 0.637742 | 1.556358 | 0.00409   | 0.013685  | 0.652335 | 1.579946 | 0.002008  | 0.006629  |
| CHIANG_LIVER_CANCER_SUBCLASS_CTNNB1_DN            | 0.75385  | 1.548381 | 0.008048  | 0.015115  | 0.751845 | 1.571491 | 0         | 0.007393  |
| LEE_LIVER_CANCER_MYC_E2F1_UP                      | 0.742595 | 1.54601  | 0.004032  | 0.015113  | 0.761261 | 1.595766 | 0         | 0.006476  |
| LEE_LIVER_CANCER_DENA_UP                          | 0.748118 | 1.570467 | 0.004016  | 0.012566  | 0.746142 | 1.584371 | 0.002004  | 0.006736  |
| WOO_LIVER_CANCER_RECURRENCE_UP                    | 0.812587 | 1.527697 | 0         | 0.017641  | 0.810137 | 1.546168 | 0         | 0.010427  |
| CHIANG_LIVER_CANCER_SUBCLASS_PROLIFERATION_U<br>P | 0.825271 | 1.48445  | 0.001996  | 0.025768  | 0.832444 | 1.479867 | 0         | 0.02598   |

**Supplementary Table S5:** Genes that are significantly related to overall survival in GSE14520

| Gene    | Probeset    | HR       | Cox p    |
|---------|-------------|----------|----------|
| NTS     | 206291_at   | 1.136602 | 0.000377 |
| SULT1C2 | 211470_s_at | 1.223927 | 0.00107  |
| MAFF    | 36711_at    | 1.253452 | 0.001977 |
| PHLDA2  | 209803_s_at | 1.23706  | 0.002095 |
| SPP1    | 209875_s_at | 1.143059 | 0.003081 |
| SULT1C2 | 205342_s_at | 1.193248 | 0.004022 |
| BICC1   | 213429_at   | 1.196197 | 0.007116 |
| KIF11   | 204444_at   | 1.402865 | 0.007119 |
| CD24    | 208650_s_at | 1.165789 | 0.010313 |
| TOP2A   | 201291_s_at | 1.213884 | 0.010848 |
| GLRB    | 205280_at   | 1.578242 | 0.011776 |
| CXCR4   | 217028_at   | 1.256456 | 0.01545  |
| KRT19   | 201650_at   | 1.176433 | 0.018503 |
| NCAPG   | 218663_at   | 1.360636 | 0.018947 |
| KIF20A  | 218755_at   | 1.286384 | 0.022774 |
| CD24    | 266_s_at    | 1.154963 | 0.02361  |
| DLK1    | 209560_s_at | 1.067821 | 0.029951 |
| CXCL8   | 202859_x_at | 1.13132  | 0.034523 |
| ARG2    | 203946_s_at | 1.196763 | 0.035267 |
| DLGAP5  | 203764_at   | 1.263921 | 0.042502 |
| CXCL13  | 205242_at   | 0.798521 | 0.044972 |
| TOP2A   | 201292_at   | 1.17908  | 0.048795 |
