# Supplementary material for: Transcriptomic Analysis of Hepatitis B Infected Liver for Prediction of Hepatocellular Carcinoma
Source: MDPI journal article supplement (doi:10.3390/biology12020188), 2023-01-26
Supplement: s1 [file s1]

# PCM1 gene expression in HCC tumors vs. normal liver

a

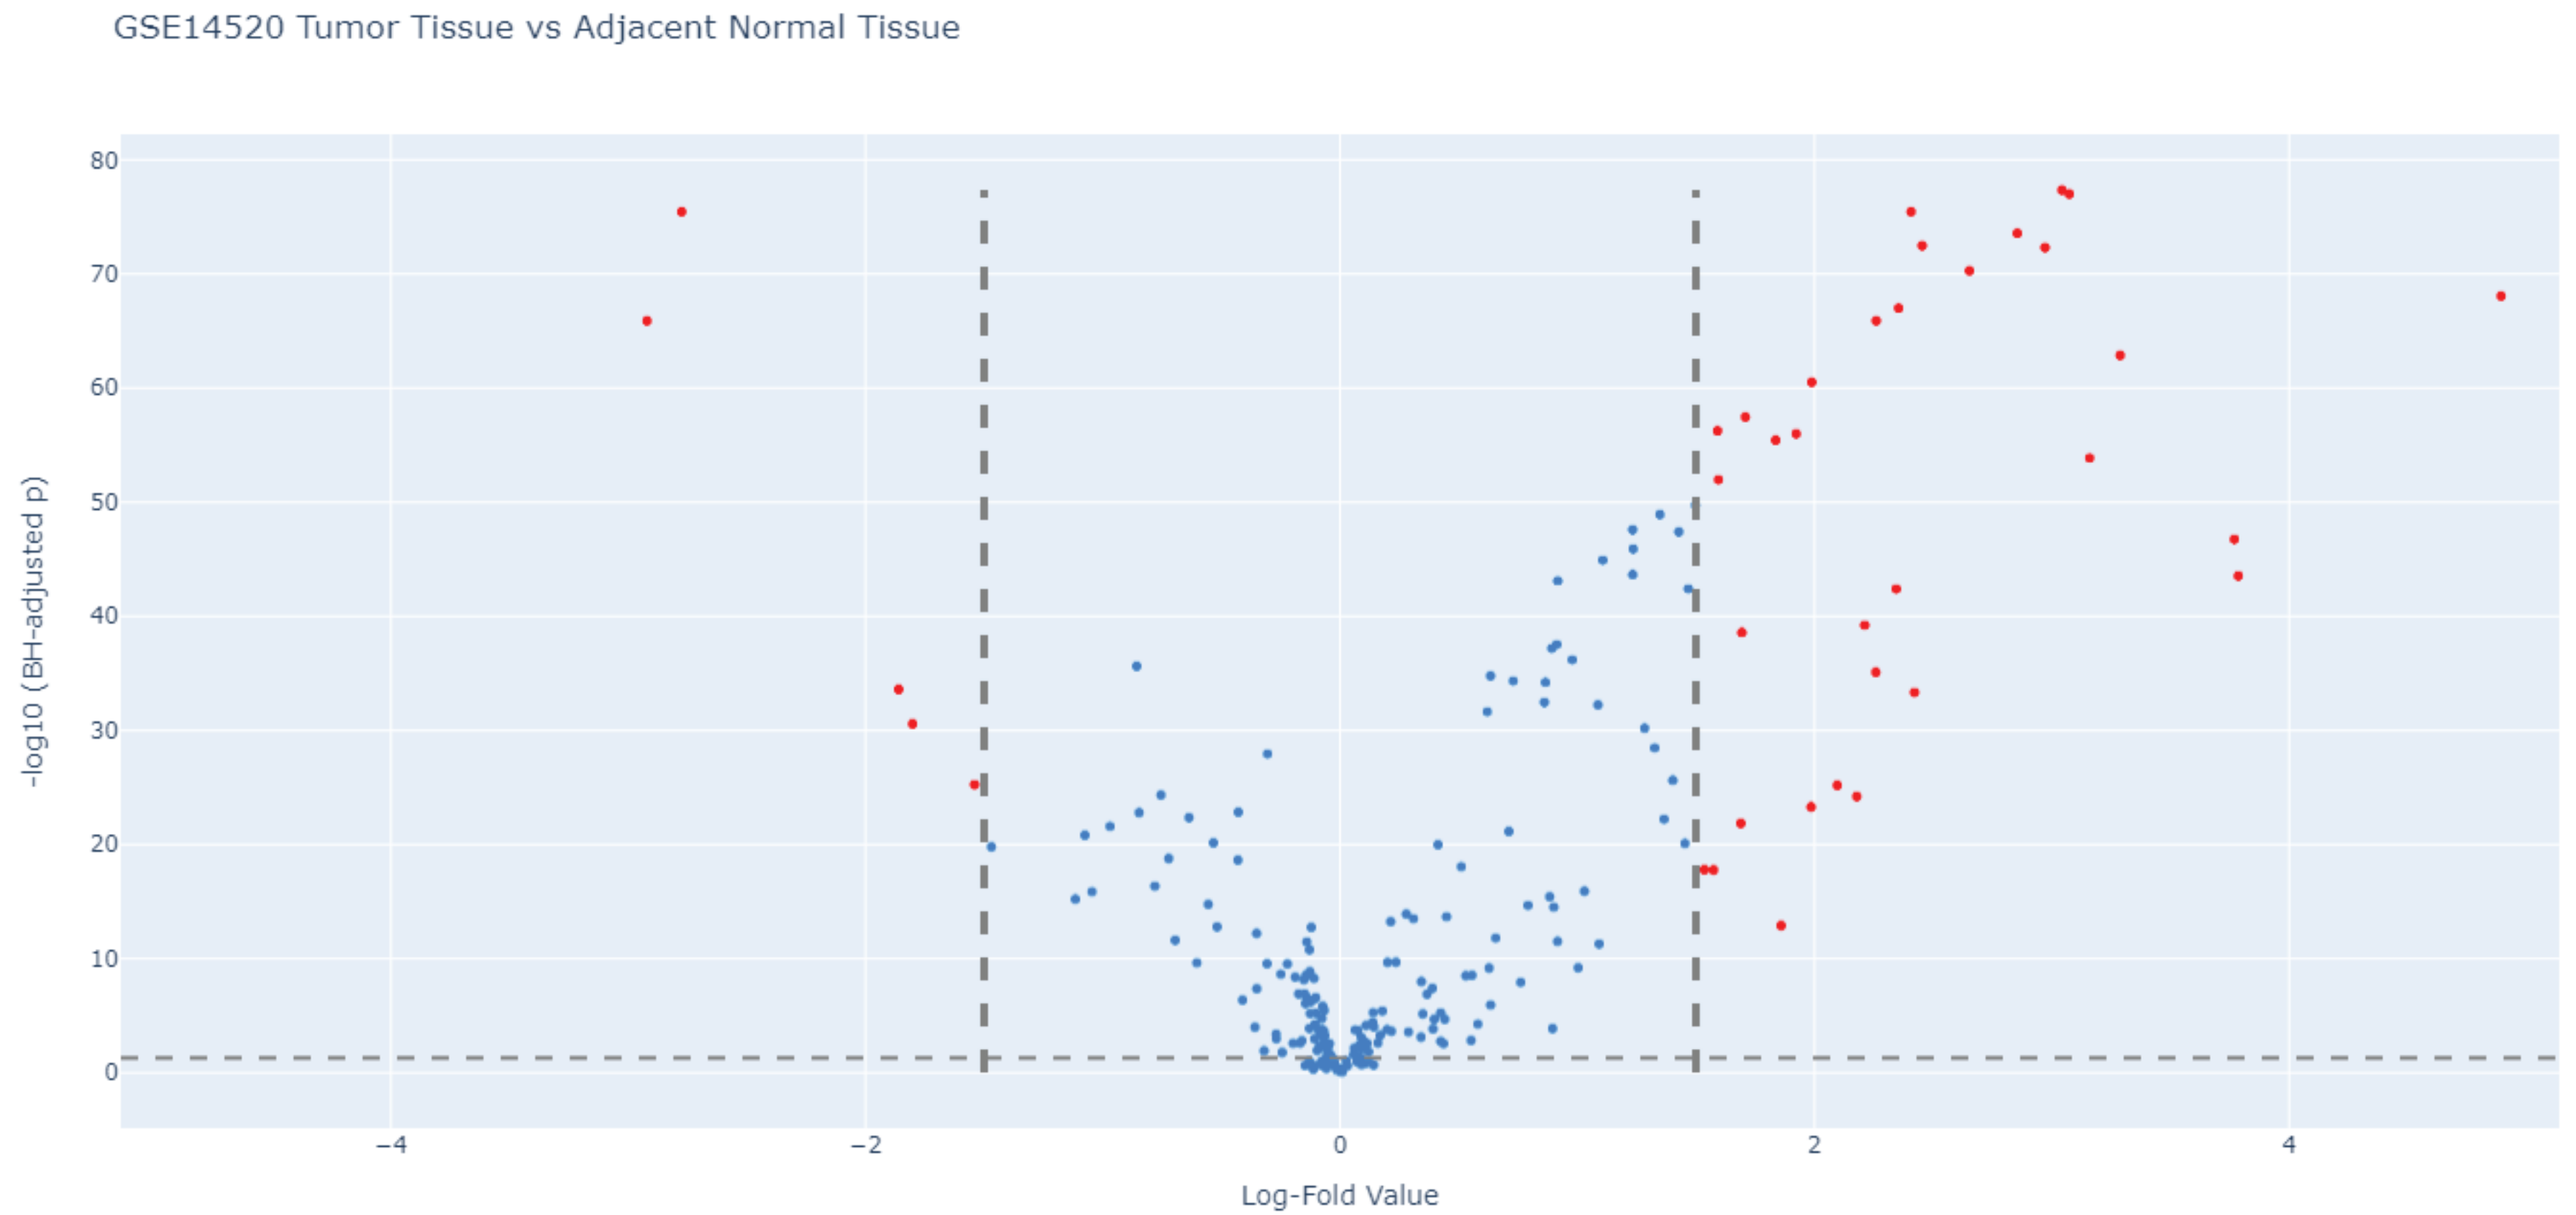

b

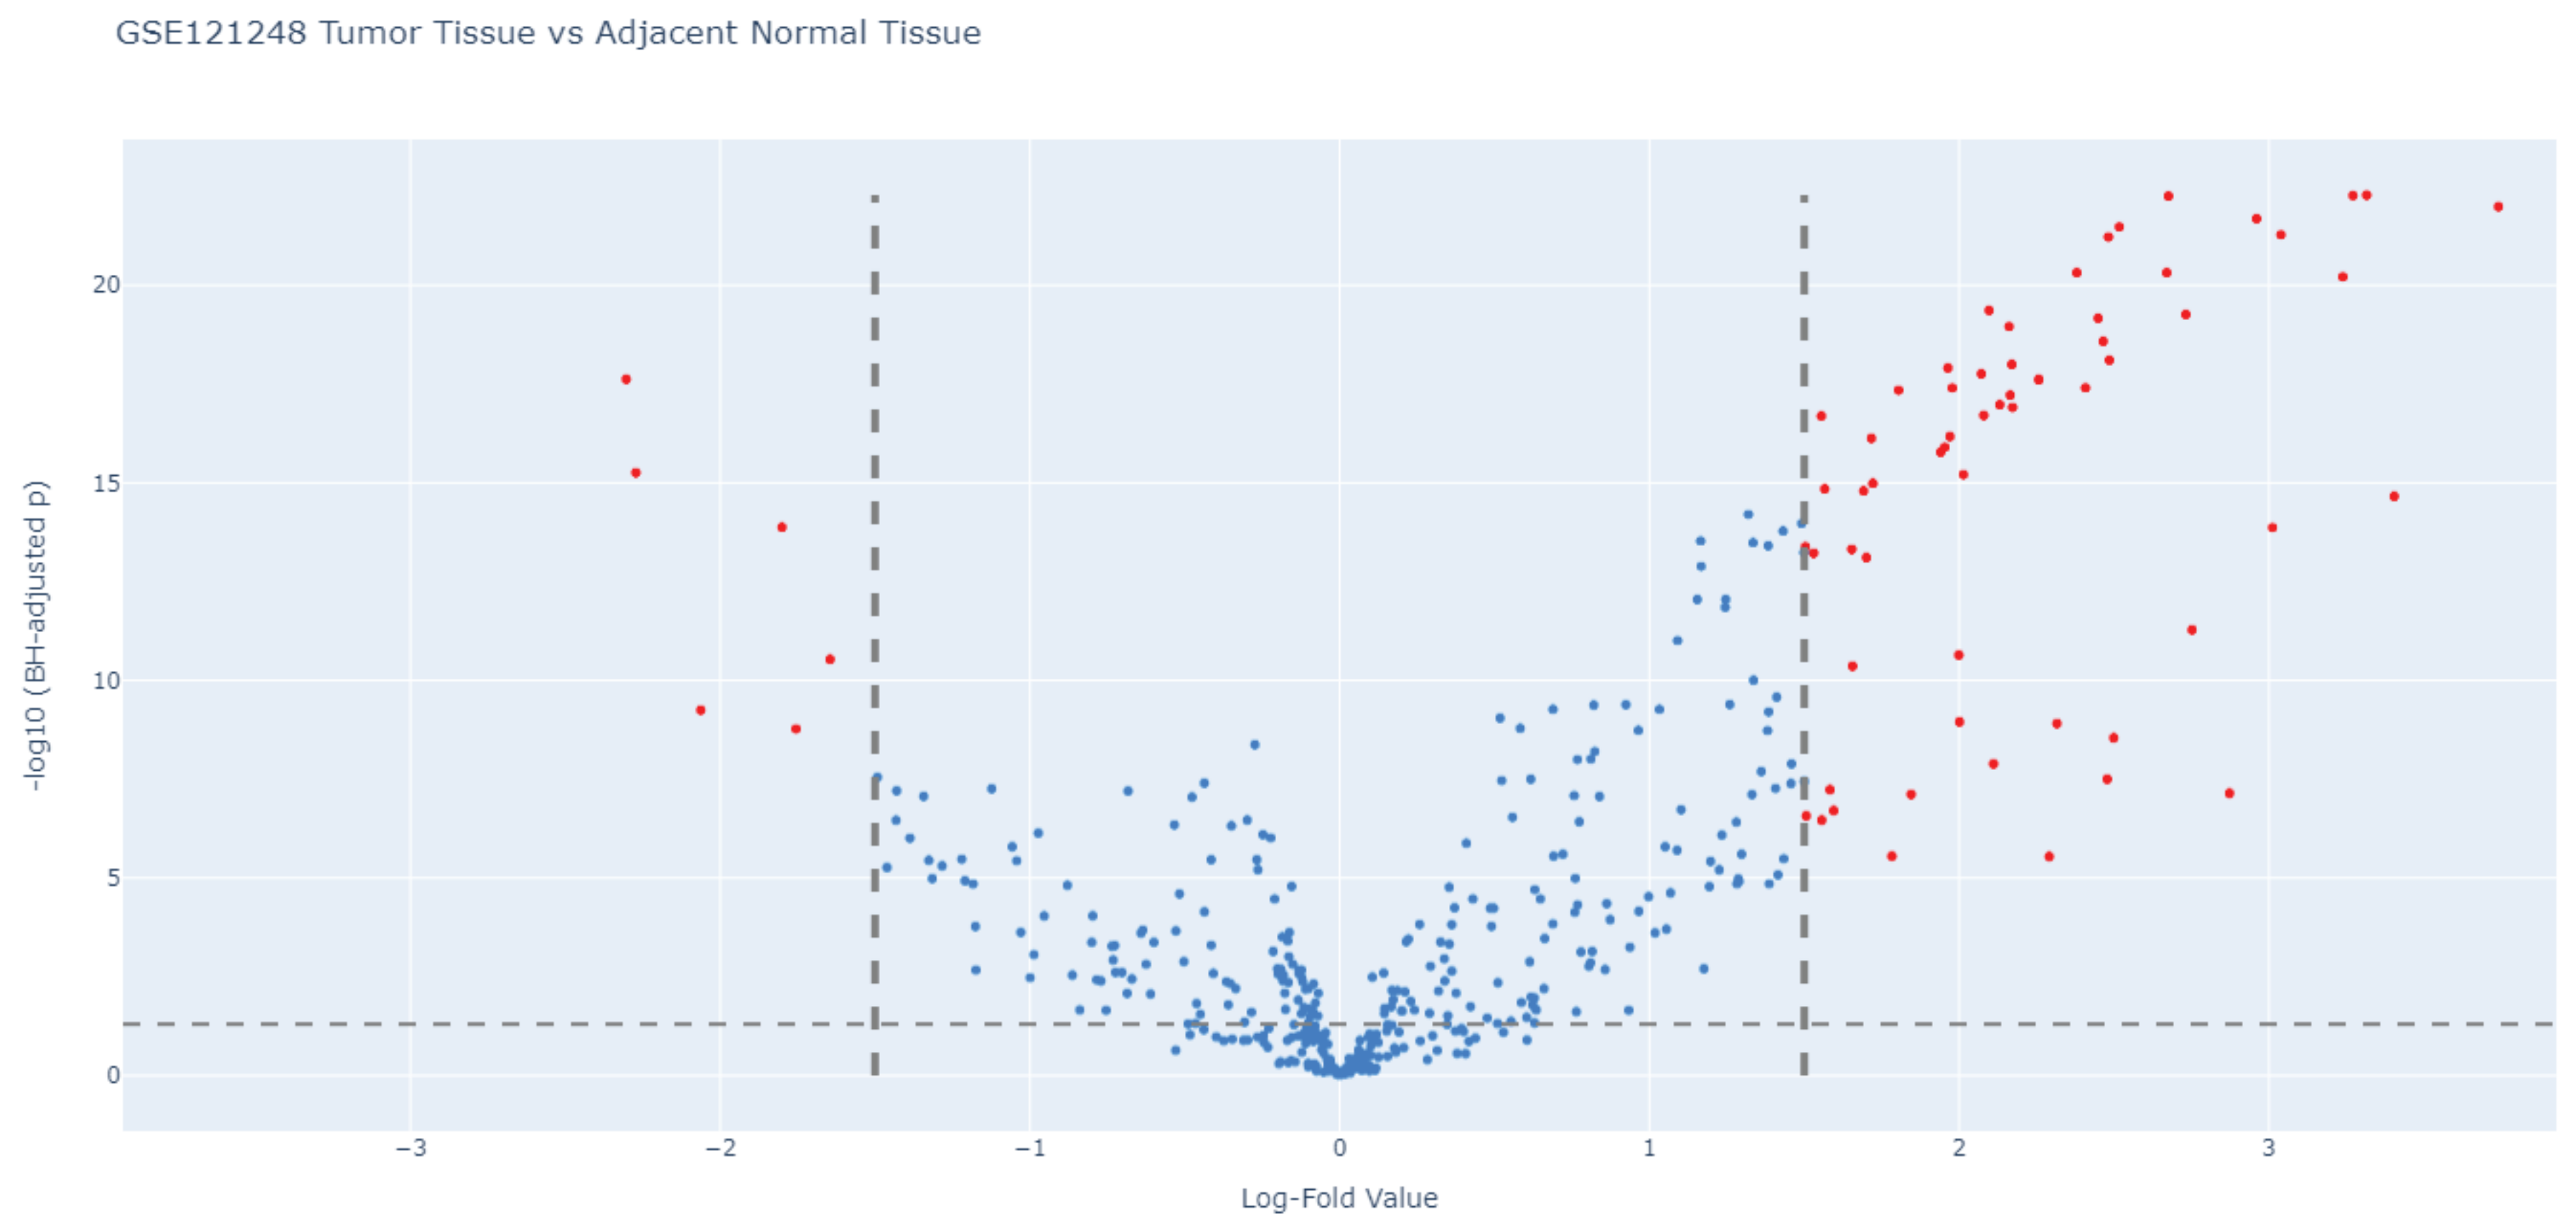

**Supplementary Figure S7:** Volcano plot comparing HCC tumors vs normal liver for PCM1 genes. Unpaired and paired t-test were per-formed in GSE121248 and GSE14520 for each probeset, respectively. Each dot represents one probeset. Log fold changes and Ben-jamini Hochberg corrected p values are given in x and y axis, respectively.
