# Supplementary material for: Transcriptomic Analysis of Hepatitis B Infected Liver for Prediction of Hepatocellular Carcinoma
Source: MDPI journal article supplement (doi:10.3390/biology12020188), 2023-01-26
Supplement: s1 [file s1]

## Functional analysis of genes included in PCM1

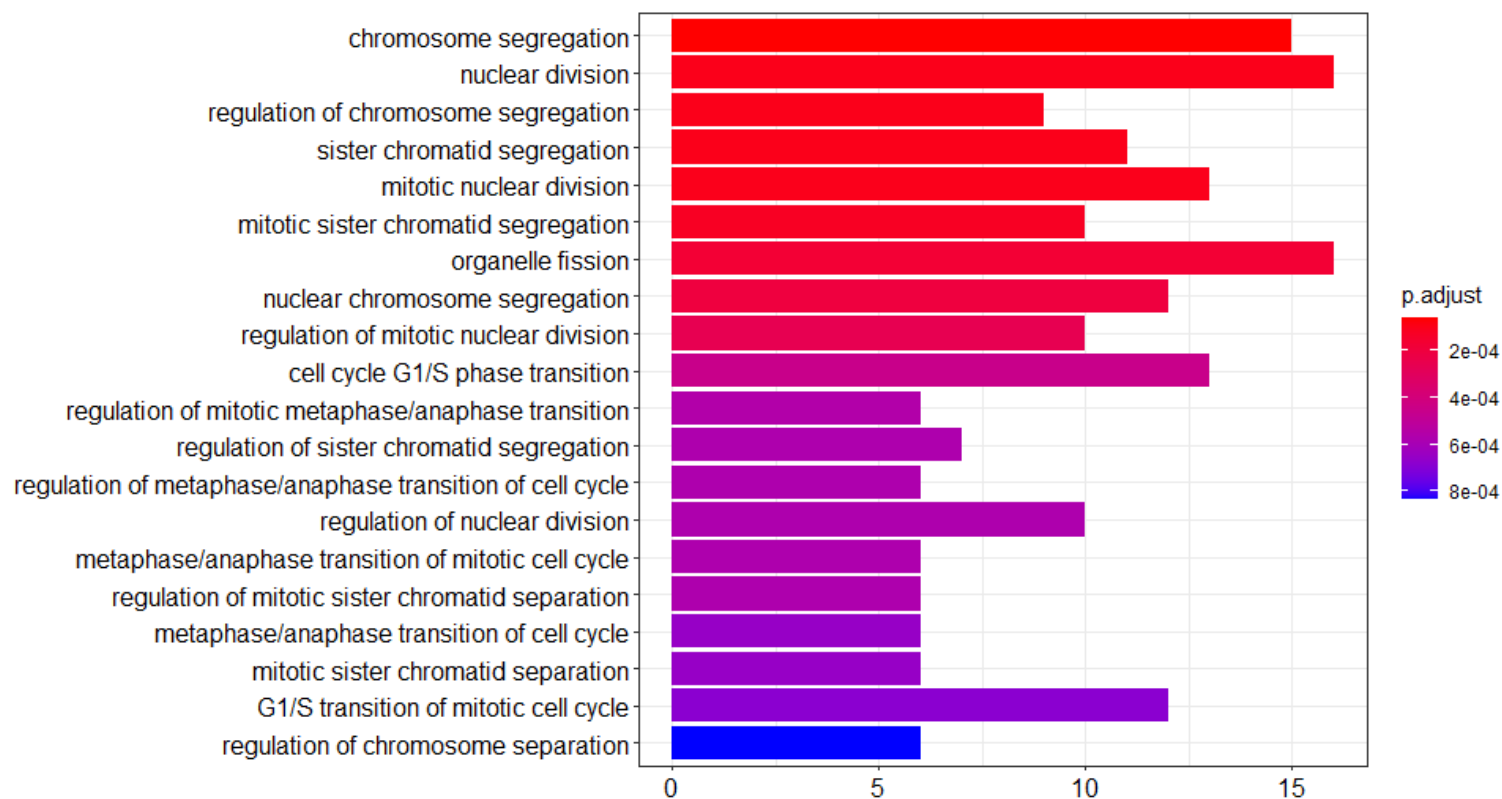

**Supplementary Figure S4:** Functional over-representation of 176 gene panel. Top 20 mechanisms with lowest enrichR based adjusted p value are shown.
