# Supplementary material for: Transcriptomic Analysis of Hepatitis B Infected Liver for Prediction of Hepatocellular Carcinoma
Source: MDPI journal article supplement (doi:10.3390/biology12020188), 2023-01-26
Supplement: s1 [file s1]

# Protein Network Analysis of PCM1

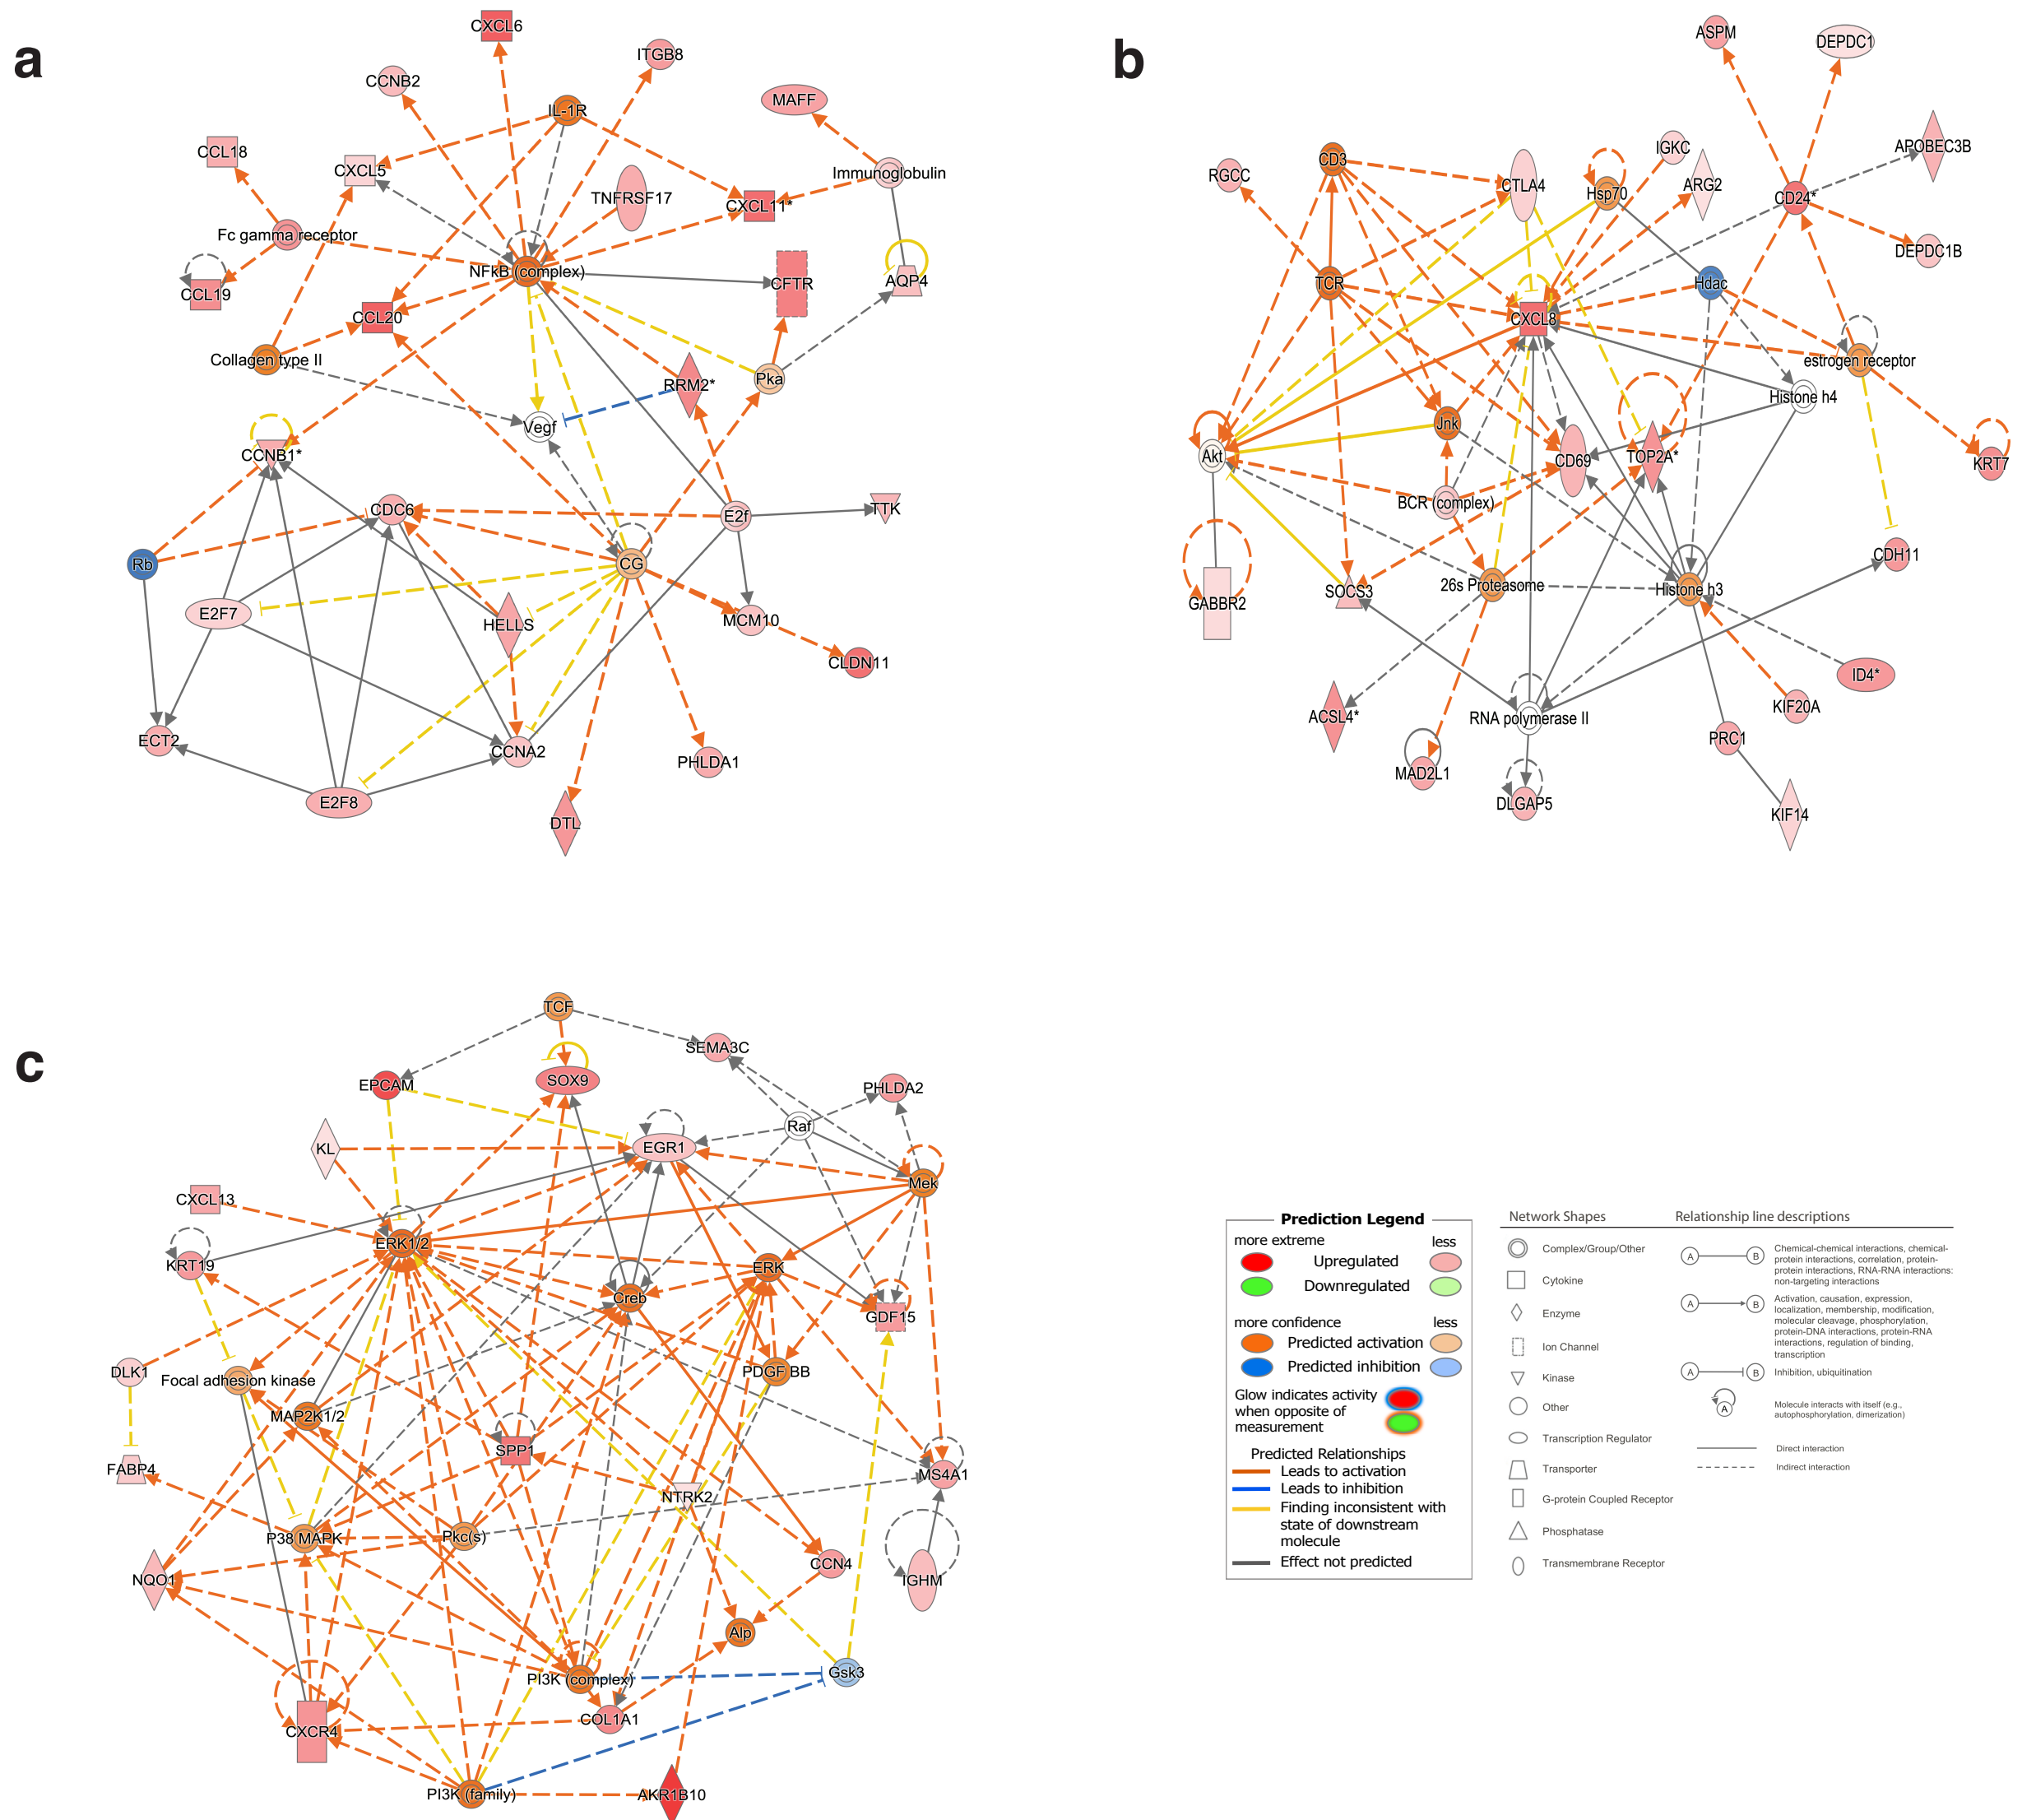

**Supplementary Figure S8:** Top molecular networks based on PCM1 generated through the use of IPA (QIAGEN Inc., <https://digitalinsights.qiagen.com/IPA>). Three networks with the highest number of focus molecules and the highest score (>30) are given. a, b and c show the top first, second, and the third network, respectively.
