# Supplementary material for: Transcriptomic Analysis of Hepatitis B Infected Liver for Prediction of Hepatocellular Carcinoma
Source: MDPI journal article supplement (doi:10.3390/biology12020188), 2023-01-26
Supplement: s1 [file s1]

# Protein-protein interaction network of PCM1

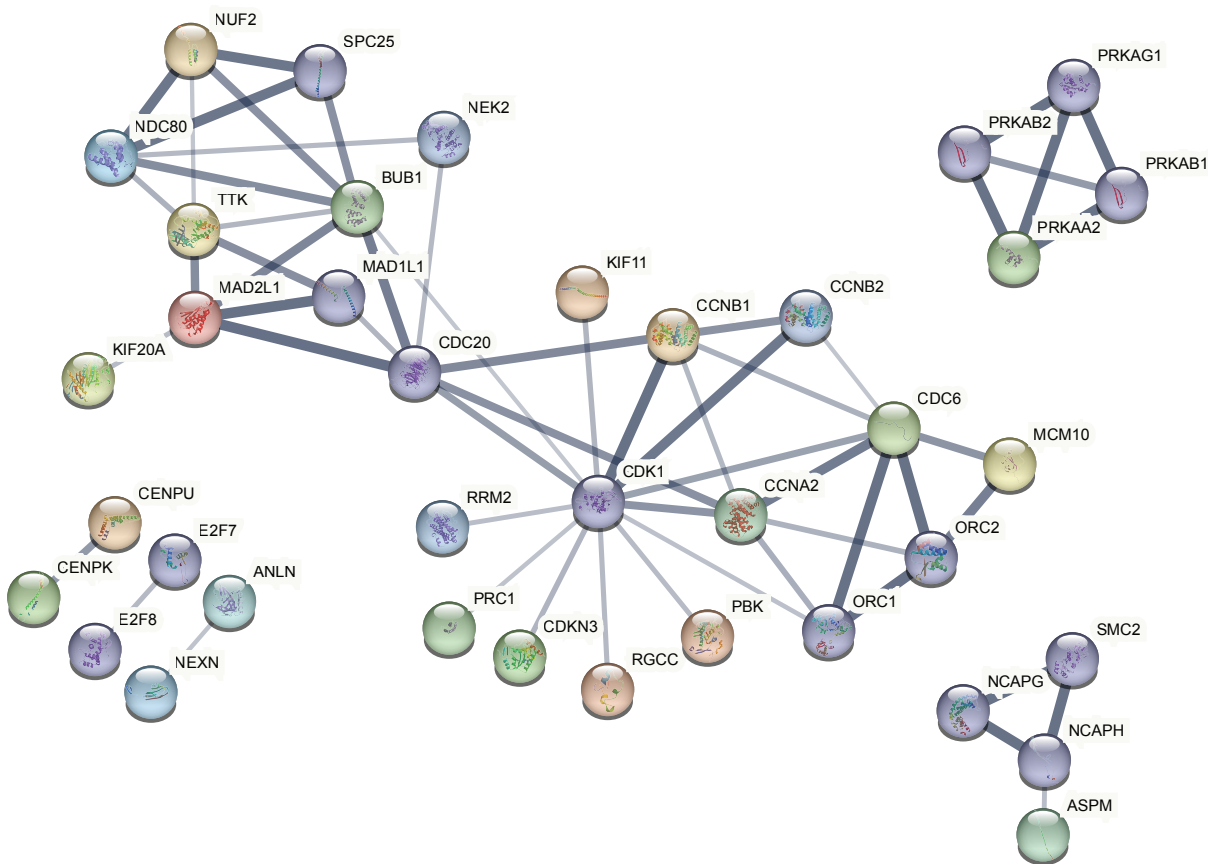

**Supplementary figure S9:** PPI network of proteins coded by PCM1 genes. 172 genes in PCM1 signature were used as input for network construction via STRING (<https://string-db.org/>). Line thickness indicates the strength of data support. The network was restricted to physical interactions with experimental evidence.
