# Supplementary material for: Transcriptomic Analysis of Hepatitis B Infected Liver for Prediction of Hepatocellular Carcinoma
Source: MDPI journal article supplement (doi:10.3390/biology12020188), 2023-01-26
Supplement: s1 [file s1]

# Expression of cell cycle related genes in PCM1-U and PCM1-D livers

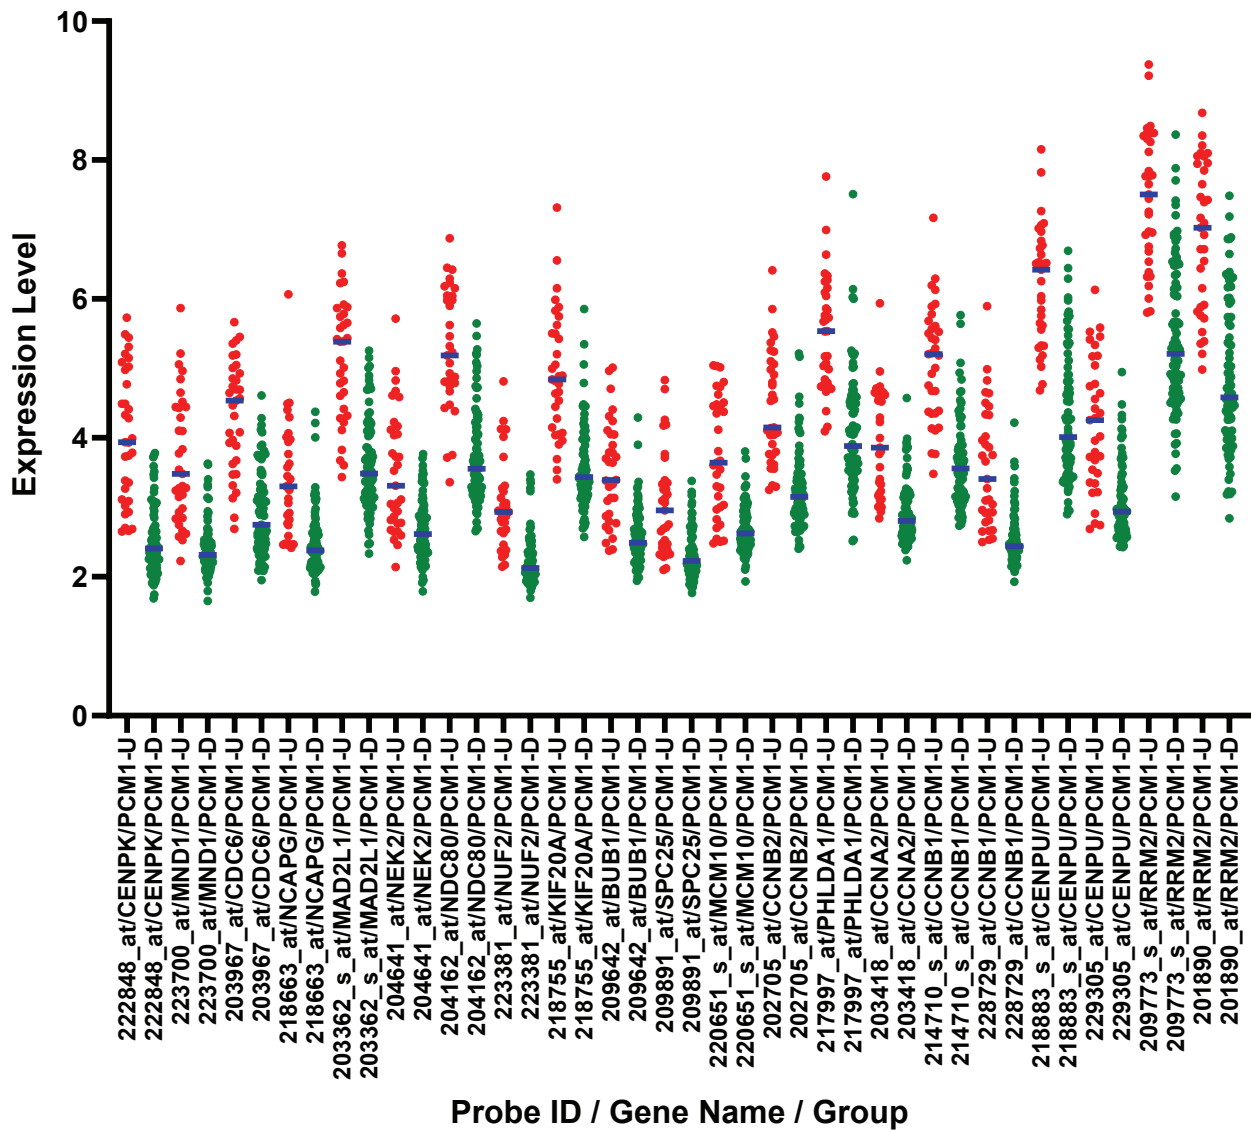

**Supplementary Figure S5:** Cell cycle related gene expression in PCM1-U (red) and PCM1-D (green) groups (GSE83148). Horizontal line indicates median.
