# Supplementary material for: Transcriptomic Analysis of Hepatitis B Infected Liver for Prediction of Hepatocellular Carcinoma
Source: Biology (Basel). 2023 Jan 26;12(2):188. doi: 10.3390/biology12020188 (PMC9952979; doi:10.3390/biology12020188)
Supplement: Supplementary file 1 [file biology-12-00188-s001.zip]

Archive with 15 entries (15 files):
- Sup. Figure S1.pdf
- Sup. Figure S2.pdf
- Sup. Figure S3.pdf
- Sup. Figure S4.pdf
- Sup. Figure S5.pdf
- Sup. Figure S6.pdf
- Sup. Figure S7.pdf
- Supp. Figure S8.pdf
- Supp. Figure S9.pdf
- Supp. Table S10.xlsx
- Supp. Table S6.xlsx
- Supp. Table S7.xlsx
- Supp. Table S8.xlsx
- Supp. Table S9.xlsx
- Supp. Tables S1-S5.pdf
