# Supplementary material for: Transcriptomic Analysis of Hepatitis B Infected Liver for Prediction of Hepatocellular Carcinoma
Source: Biology (Basel). 2023 Jan 26;12(2):188. doi: 10.3390/biology12020188 (PMC9952979; doi:10.3390/biology12020188)
Supplement: Supplementary file 1 [file biology-12-00188-s001.zip › Supp. Table S6.xlsx]

## Sheet: Enriched GSEA
Supplementary Table S6: Common 500 genesets enriched (GSEA) in GSE84044 and GSE83148
	GSE84044					GSE83148
	GO ID	ES	NES	NOM p-val	FDR q-val	ES	NES	NOM p-val	FDR q-val
GO_REGULATION_OF_CELL_CYCLE_PHASE_TRANSITION	GO:1901987	0.582907	1.92856	0	0.179829	0.561859	1.83797	0.00205339	0.104415
GO_RNA_CATABOLIC_PROCESS	GO:0006401	0.380526	1.92485	0	0.158437	0.376819	1.89556	0	0.239588
GO_NEGATIVE_REGULATION_OF_MITOTIC_CELL_CYCLE	GO:0045930	0.593739	1.92022	0	0.12888	0.577362	1.83486	0.00206186	0.0867859
GO_EXTRINSIC_APOPTOTIC_SIGNALING_PATHWAY_VIA_DEATH_DOMAIN_RECEPTORS	GO:0008625	0.656908	1.91474	0	0.101707	0.660441	1.87562	0	0.187948
GO_LATE_ENDOSOME_MEMBRANE	GO:0031902	0.51083	1.91382	0.00198413	0.0949398	0.496911	1.83778	0.00208768	0.10121
GO_HEMATOPOIETIC_PROGENITOR_CELL_DIFFERENTIATION	GO:0002244	0.499789	1.90927	0	0.0929932	0.473282	1.81011	0.00207469	0.0623354
GO_NEGATIVE_REGULATION_OF_RESPONSE_TO_DNA_DAMAGE_STIMULUS	GO:2001021	0.570491	1.90878	0	0.0870506	0.550254	1.82352	0	0.0686525
GO_SIGNAL_TRANSDUCTION_BY_P53_CLASS_MEDIATOR	GO:0072331	0.553183	1.90818	0	0.0824266	0.546229	1.86178	0	0.134634
GO_CELL_CYCLE_G2_M_PHASE_TRANSITION	GO:0044839	0.579467	1.90525	0	0.079957	0.557908	1.80683	0.00208768	0.0584988
GO_SITE_OF_DNA_DAMAGE	GO:0090734	0.576054	1.89998	0.00209205	0.0799087	0.574975	1.89428	0.00424628	0.208117
GO_REGULATION_OF_RESPONSE_TO_CYTOKINE_STIMULUS	GO:0060759	0.625148	1.89974	0	0.0758212	0.607038	1.86441	0	0.150151
GO_EXTRINSIC_APOPTOTIC_SIGNALING_PATHWAY	GO:0097191	0.552095	1.89504	0	0.0753614	0.55039	1.85489	0	0.136054
GO_TUMOR_NECROSIS_FACTOR_MEDIATED_SIGNALING_PATHWAY	GO:0033209	0.566191	1.89484	0	0.0717728	0.556521	1.87729	0.00215054	0.205852
GO_REGULATION_OF_APOPTOTIC_SIGNALING_PATHWAY	GO:2001233	0.485159	1.89231	0	0.0680473	0.480942	1.84187	0.00215054	0.112831
GO_POSITIVE_REGULATION_OF_MULTI_ORGANISM_PROCESS	GO:0043902	0.48124	1.89214	0	0.0652974	0.463694	1.83869	0	0.107709
GO_REGULATION_OF_CELL_CYCLE_G2_M_PHASE_TRANSITION	GO:1902749	0.563907	1.88845	0	0.0651456	0.541787	1.79019	0.00210084	0.0510166
GO_POSITIVE_REGULATION_OF_APOPTOTIC_SIGNALING_PATHWAY	GO:2001235	0.499065	1.8849	0	0.065437	0.492728	1.79484	0.00214133	0.0529495
GO_SITE_OF_DOUBLE_STRAND_BREAK	GO:0035861	0.577958	1.88116	0.00412371	0.0631953	0.574839	1.87241	0.00210526	0.160977
GO_PROTEIN_MODIFICATION_BY_SMALL_PROTEIN_REMOVAL	GO:0070646	0.463799	1.87906	0.0039604	0.0623857	0.450187	1.80445	0	0.05652
GO_NEGATIVE_REGULATION_OF_EXTRINSIC_APOPTOTIC_SIGNALING_PATHWAY	GO:2001237	0.560819	1.87847	0.0020284	0.0585268	0.557329	1.87951	0	0.225648
GO_INTRINSIC_APOPTOTIC_SIGNALING_PATHWAY	GO:0097193	0.496521	1.8767	0	0.0578586	0.488814	1.83066	0	0.0813886
GO_VIRAL_LIFE_CYCLE	GO:0019058	0.540209	1.87476	0	0.0572672	0.518156	1.83013	0	0.0776995
GO_REGULATION_OF_HEMATOPOIETIC_PROGENITOR_CELL_DIFFERENTIATION	GO:1901532	0.408308	1.87382	0	0.0559266	0.384514	1.74395	0.00860215	0.0401025
GO_NEGATIVE_REGULATION_OF_CHROMOSOME_ORGANIZATION	GO:2001251	0.580007	1.87375	0	0.0543287	0.550163	1.71567	0.00425532	0.0330841
GO_MEMBRANE_DOCKING	GO:0022406	0.526458	1.8724	0	0.0533262	0.524559	1.85199	0	0.124537
GO_REGULATION_OF_CHROMOSOME_ORGANIZATION	GO:0033044	0.502841	1.87129	0.00205339	0.0511343	0.479122	1.73842	0.00420168	0.0386657
GO_TERTIARY_GRANULE_MEMBRANE	GO:0070821	0.640512	1.87	0	0.050242	0.626238	1.84258	0	0.127153
GO_NEGATIVE_REGULATION_OF_CELL_CYCLE_PHASE_TRANSITION	GO:1901988	0.604864	1.86986	0	0.0490831	0.588516	1.79779	0.00205339	0.0562477
GO_DNA_GEOMETRIC_CHANGE	GO:0032392	0.622646	1.86951	0	0.0481229	0.611002	1.82453	0.00407332	0.0693943
GO_REGULATION_OF_EXTRINSIC_APOPTOTIC_SIGNALING_PATHWAY	GO:2001236	0.527751	1.86847	0	0.0476808	0.528886	1.8371	0	0.092249
GO_KINASE_INHIBITOR_ACTIVITY	GO:0019210	0.535129	1.86774	0	0.0468435	0.516806	1.80105	0.00211864	0.0571517
GO_ANTIGEN_PROCESSING_AND_PRESENTATION_OF_PEPTIDE_ANTIGEN_VIA_MHC_CLASS_I	GO:0002474	0.620491	1.86602	0	0.0464216	0.59925	1.7616	0.00851064	0.044143
GO_REGULATION_OF_MULTI_ORGANISM_PROCESS	GO:0043900	0.535339	1.86397	0	0.0458708	0.5083	1.79738	0.00209644	0.0558119
GO_CENTROSOME	GO:0005813	0.544884	1.86321	0	0.0453163	0.533171	1.80848	0.00206186	0.060022
GO_UBIQUITIN_LIKE_PROTEIN_LIGASE_BINDING	GO:0044389	0.445601	1.8622	0	0.0455674	0.436369	1.84203	0.00408998	0.116862
GO_ANTIGEN_PROCESSING_AND_PRESENTATION_OF_EXOGENOUS_PEPTIDE_ANTIGEN_VIA_MHC_CLASS_I	GO:0042590	0.642451	1.86205	0	0.044618	0.619142	1.73794	0.00429185	0.0379176
GO_CELLULAR_RESPONSE_TO_OXIDATIVE_STRESS	GO:0034599	0.5445	1.86152	0	0.0437501	0.541206	1.82721	0	0.0712961
GO_VESICLE_ORGANIZATION	GO:0016050	0.44054	1.86073	0	0.0432777	0.439132	1.84671	0.00213675	0.126446
GO_NEGATIVE_REGULATION_OF_CELL_CYCLE_PROCESS	GO:0010948	0.559485	1.86001	0	0.0426073	0.544158	1.78151	0.00414938	0.0488402
GO_DNA_INTEGRITY_CHECKPOINT	GO:0031570	0.619032	1.85687	0	0.0426009	0.607293	1.76374	0.00208333	0.0443429
GO_POSITIVE_REGULATION_OF_ESTABLISHMENT_OF_PROTEIN_LOCALIZATION_TO_MITOCHONDRION	GO:1903749	0.493194	1.85478	0	0.0429379	0.474213	1.73812	0.00414079	0.0383853
GO_SPINDLE	GO:0005819	0.591415	1.85396	0	0.042479	0.573481	1.71931	0.00213675	0.0337544
GO_RESPONSE_TO_OXIDATIVE_STRESS	GO:0006979	0.51266	1.85386	0	0.0417393	0.517843	1.84014	0	0.11027
GO_CELL_CYCLE_CHECKPOINT	GO:0000075	0.654074	1.85167	0	0.0413111	0.63875	1.7561	0.00208768	0.0442233
GO_NEGATIVE_REGULATION_OF_APOPTOTIC_SIGNALING_PATHWAY	GO:2001234	0.50436	1.85055	0.0020284	0.0412328	0.509378	1.86437	0	0.14021
GO_NEGATIVE_REGULATION_OF_DNA_BINDING	GO:0043392	0.578957	1.8495	0	0.0411951	0.566063	1.78078	0	0.048878
GO_REGULATION_OF_INTRINSIC_APOPTOTIC_SIGNALING_PATHWAY	GO:2001242	0.523621	1.84888	0.00203666	0.040734	0.517837	1.82167	0	0.0671832
GO_PROTEIN_CONTAINING_COMPLEX_DISASSEMBLY	GO:0032984	0.450643	1.84787	0	0.040575	0.45065	1.79651	0.00623701	0.0541009
GO_REGULATION_OF_PROTEIN_LOCALIZATION_TO_MEMBRANE	GO:1905475	0.493357	1.84782	0	0.039931	0.487904	1.82591	0	0.0712567
GO_REGULATION_OF_SYMBIOSIS_ENCOMPASSING_MUTUALISM_THROUGH_PARASITISM	GO:0043903	0.588464	1.84601	0	0.0401461	0.570437	1.8085	0	0.0609113
GO_DNA_DEPENDENT_ATPASE_ACTIVITY	GO:0008094	0.591958	1.84567	0.00414938	0.0396076	0.572342	1.79509	0.00207039	0.0538702
GO_SIGNAL_TRANSDUCTION_IN_RESPONSE_TO_DNA_DAMAGE	GO:0042770	0.61933	1.84331	0	0.040653	0.615439	1.81612	0	0.0628389
GO_REGULATION_OF_STEM_CELL_DIFFERENTIATION	GO:2000736	0.504673	1.84224	0.00205761	0.0406443	0.492322	1.77312	0.00204918	0.0464639
GO_DNA_REPLICATION	GO:0006260	0.604194	1.84199	0.0020284	0.0400466	0.58742	1.74977	0.00626305	0.0426707
GO_INTERACTION_WITH_HOST	GO:0051701	0.526407	1.84196	0	0.0395868	0.499435	1.77099	0.0021097	0.0463731
GO_REGULATION_OF_PROTEIN_MODIFICATION_BY_SMALL_PROTEIN_CONJUGATION_OR_REMOVAL	GO:1903320	0.466317	1.83825	0.00200803	0.0399139	0.444496	1.70851	0.00626305	0.0329858
GO_SPECIFIC_GRANULE_MEMBRANE	GO:0035579	0.579214	1.83798	0	0.0394491	0.563577	1.81592	0.0041841	0.0620172
GO_CHROMOSOMAL_REGION	GO:0098687	0.603283	1.83599	0	0.039191	0.583554	1.70573	0.00838574	0.0324147
GO_INTERLEUKIN_1_MEDIATED_SIGNALING_PATHWAY	GO:0070498	0.476281	1.83571	0.00399202	0.0387673	0.465303	1.78445	0.00414938	0.0504643
GO_MIDBODY	GO:0030496	0.603692	1.8356	0	0.0382572	0.566456	1.6819	0.00425532	0.0314829
GO_SPINDLE_POLE	GO:0000922	0.607078	1.83514	0	0.0378854	0.592497	1.71644	0.00423729	0.0330651
GO_REGULATION_OF_PROTEIN_CATABOLIC_PROCESS	GO:0042176	0.430291	1.83493	0.00197239	0.0375432	0.410651	1.73052	0	0.0357969
GO_ATPASE_ACTIVITY	GO:0016887	0.451131	1.83323	0	0.0375862	0.436113	1.77658	0.00205761	0.0478246
GO_RNA_LOCALIZATION	GO:0006403	0.455537	1.83274	0.00811359	0.0367882	0.448506	1.81801	0.00406504	0.0633819
GO_CELLULAR_RESPONSE_TO_ANTIBIOTIC	GO:0071236	0.588533	1.83201	0	0.0366318	0.583086	1.82279	0	0.0677593
GO_POSITIVE_REGULATION_OF_ORGANELLE_ASSEMBLY	GO:1902117	0.494174	1.82987	0.00411523	0.0364737	0.484715	1.82818	0.0041841	0.0738584
GO_POSITIVE_REGULATION_OF_CELLULAR_PROTEIN_LOCALIZATION	GO:1903829	0.480329	1.8285	0	0.0362349	0.475898	1.8061	0	0.0580284
GO_ANTIGEN_PROCESSING_AND_PRESENTATION	GO:0019882	0.619083	1.8285	0	0.0358231	0.602023	1.74851	0.00847458	0.0420335
GO_EMBRYONIC_PLACENTA_DEVELOPMENT	GO:0001892	0.556393	1.82823	0	0.0354703	0.551995	1.76385	0	0.0446105
GO_REGULATION_OF_BINDING	GO:0051098	0.469182	1.82657	0.002079	0.0352803	0.474691	1.84213	0	0.122015
GO_CELL_CORTEX	GO:0005938	0.454481	1.82549	0.00209644	0.0349355	0.459693	1.82576	0.00431965	0.0699126
GO_REGULATION_OF_DNA_BINDING	GO:0051101	0.512949	1.82537	0	0.034575	0.494385	1.76313	0.00417537	0.0443552
GO_REGULATION_OF_PROTEIN_LOCALIZATION_TO_CELL_PERIPHERY	GO:1904375	0.513078	1.82478	0	0.0339761	0.495628	1.74629	0.00215517	0.0412491
GO_CELLULAR_RESPONSE_TO_OXYGEN_LEVELS	GO:0071453	0.462925	1.82354	0	0.0333532	0.457033	1.81126	0	0.0627866
GO_APICAL_JUNCTION_ASSEMBLY	GO:0043297	0.581365	1.82353	0.00210084	0.0330196	0.563705	1.76902	0.00212314	0.0463413
GO_REGULATION_OF_EXTRINSIC_APOPTOTIC_SIGNALING_PATHWAY_VIA_DEATH_DOMAIN_RECEPTORS	GO:1902041	0.670924	1.8229	0.00204082	0.0328553	0.669961	1.79093	0	0.0518152
GO_REGULATION_OF_CELL_CYCLE_G1_S_PHASE_TRANSITION	GO:1902806	0.602995	1.82234	0	0.0326559	0.586867	1.74416	0.00210084	0.0404184
GO_I_KAPPAB_KINASE_NF_KAPPAB_SIGNALING	GO:0007249	0.572655	1.82233	0	0.0323388	0.561462	1.78369	0.00205339	0.0503127
GO_TRANSLATIONAL_INITIATION	GO:0006413	0.391302	1.82113	0.00858369	0.032336	0.402151	1.86949	0.00635593	0.153284
GO_POSITIVE_REGULATION_OF_PROTEOLYSIS	GO:0045862	0.436742	1.82096	0	0.0320909	0.427657	1.78479	0	0.0508228
GO_MITOTIC_DNA_INTEGRITY_CHECKPOINT	GO:0044774	0.629399	1.81967	0	0.0322252	0.606274	1.72345	0.00414079	0.0337024
GO_MITOTIC_CELL_CYCLE_CHECKPOINT	GO:0007093	0.670607	1.81949	0	0.0320741	0.654141	1.73552	0.00206612	0.0367247
GO_DNA_DAMAGE_RESPONSE_SIGNAL_TRANSDUCTION_BY_P53_CLASS_MEDIATOR	GO:0030330	0.640949	1.81943	0	0.0317971	0.633726	1.79812	0	0.0566244
GO_POSITIVE_REGULATION_OF_NUCLEOBASE_CONTAINING_COMPOUND_METABOLIC_PROCESS	GO:0045935	0.443537	1.81906	0	0.0316084	0.429747	1.77827	0.00208768	0.0479097
GO_REGULATION_OF_DNA_BINDING_TRANSCRIPTION_FACTOR_ACTIVITY	GO:0051090	0.496443	1.81874	0.0020202	0.0314609	0.489982	1.819	0	0.0650717
GO_POSITIVE_REGULATION_OF_CELL_CYCLE_PROCESS	GO:0090068	0.562302	1.81739	0	0.0315859	0.549562	1.75451	0.00416667	0.0439602
GO_NEGATIVE_REGULATION_OF_TRANSFERASE_ACTIVITY	GO:0051348	0.474972	1.81537	0	0.0314526	0.471515	1.80892	0	0.0623062
GO_REGULATION_OF_CYTOSKELETON_ORGANIZATION	GO:0051493	0.520084	1.81469	0	0.0313423	0.520949	1.78324	0	0.0496084
GO_NEGATIVE_REGULATION_OF_DNA_BINDING_TRANSCRIPTION_FACTOR_ACTIVITY	GO:0043433	0.552297	1.81341	0.00411523	0.0308806	0.541094	1.78629	0	0.0510058
GO_REGULATION_OF_MRNA_CATABOLIC_PROCESS	GO:0061013	0.376728	1.81303	0	0.0307366	0.36732	1.76562	0.00845666	0.0443627
GO_POSITIVE_REGULATION_OF_CELL_CYCLE_PHASE_TRANSITION	GO:1901989	0.692029	1.81228	0	0.0307928	0.6541	1.69867	0.00824742	0.0322144
GO_NEGATIVE_REGULATION_OF_ORGANELLE_ORGANIZATION	GO:0010639	0.494381	1.81219	0	0.0305383	0.484307	1.77422	0.00211416	0.0466665
GO_REGULATION_OF_TUMOR_NECROSIS_FACTOR_MEDIATED_SIGNALING_PATHWAY	GO:0010803	0.635212	1.81151	0.00409836	0.0305015	0.648186	1.87456	0.00204082	0.172264
GO_DNA_CONFORMATION_CHANGE	GO:0071103	0.536158	1.80978	0.00206612	0.0309089	0.515212	1.7292	0.00625	0.0351959
GO_POSITIVE_REGULATION_OF_IMMUNE_EFFECTOR_PROCESS	GO:0002699	0.631393	1.80923	0.00200803	0.0308167	0.603874	1.73105	0.00842105	0.0360314
GO_CELLULAR_RESPONSE_TO_REACTIVE_OXYGEN_SPECIES	GO:0034614	0.571892	1.80898	0	0.0305869	0.563278	1.76831	0	0.0456376
GO_POSITIVE_REGULATION_OF_INTRINSIC_APOPTOTIC_SIGNALING_PATHWAY	GO:2001244	0.534184	1.80826	0	0.0305545	0.523764	1.79142	0.00406504	0.0520097
GO_RECYCLING_ENDOSOME_MEMBRANE	GO:0055038	0.562293	1.80726	0.00414079	0.0306658	0.55729	1.73459	0.00886918	0.0364176
GO_PROTEIN_C_TERMINUS_BINDING	GO:0008022	0.496017	1.80684	0	0.0305024	0.47706	1.70913	0	0.0332732
GO_PHAGOCYTIC_VESICLE	GO:0045335	0.594623	1.80639	0.00210526	0.0304094	0.577066	1.78367	0.00854701	0.0498335
GO_POSITIVE_REGULATION_OF_I_KAPPAB_KINASE_NF_KAPPAB_SIGNALING	GO:0043123	0.589532	1.80629	0	0.0302022	0.582942	1.7588	0	0.0443185
GO_RESPONSE_TO_IONIZING_RADIATION	GO:0010212	0.586855	1.80598	0	0.0300699	0.571258	1.75194	0	0.0439025
GO_CELLULAR_RESPONSE_TO_TOXIC_SUBSTANCE	GO:0097237	0.530732	1.80579	0	0.0299565	0.521438	1.80684	0.00199203	0.0593466
GO_ENDOSOMAL_PART	GO:0044440	0.441183	1.80525	0.00197628	0.0299119	0.432541	1.80447	0.00206612	0.0572626
GO_CELL_ADHESION_MOLECULE_BINDING	GO:0050839	0.501726	1.80496	0	0.0297785	0.499243	1.77	0.00218341	0.0462089
GO_REGULATION_OF_CYCLIN_DEPENDENT_PROTEIN_KINASE_ACTIVITY	GO:1904029	0.571337	1.8045	0	0.0296943	0.554307	1.75072	0	0.0431782
GO_RESPONSE_TO_TUMOR_NECROSIS_FACTOR	GO:0034612	0.574373	1.80403	0.00207039	0.0296217	0.568579	1.80509	0.00209205	0.0577451
GO_REGULATION_OF_RESPONSE_TO_DNA_DAMAGE_STIMULUS	GO:2001020	0.477991	1.80296	0	0.0298851	0.476166	1.77585	0.00207469	0.0473433
GO_PATTERN_RECOGNITION_RECEPTOR_SIGNALING_PATHWAY	GO:0002221	0.555494	1.80265	0.00603622	0.0298204	0.527449	1.724	0.00838574	0.0338421
GO_PROTEIN_MONOUBIQUITINATION	GO:0006513	0.547643	1.8025	0.00417537	0.0296887	0.532636	1.72054	0.00207039	0.0339894
GO_SUBSTRATE_ADHESION_DEPENDENT_CELL_SPREADING	GO:0034446	0.613841	1.80235	0	0.0295252	0.622334	1.81444	0.00210084	0.0621561
GO_POST_TRANSLATIONAL_PROTEIN_MODIFICATION	GO:0043687	0.38709	1.80194	0	0.0293752	0.384132	1.75111	0	0.0434844
GO_RECYCLING_ENDOSOME	GO:0055037	0.525487	1.80135	0	0.0291745	0.531176	1.82981	0.00209644	0.0762055
GO_REGULATION_OF_LEUKOCYTE_MEDIATED_IMMUNITY	GO:0002703	0.617056	1.80072	0.00200803	0.0289711	0.594019	1.73806	0.00849257	0.038225
GO_RESPONSE_TO_HYDROGEN_PEROXIDE	GO:0042542	0.606267	1.80014	0	0.0290146	0.599256	1.7457	0	0.0410196
GO_NECROTIC_CELL_DEATH	GO:0070265	0.656781	1.79946	0	0.0289972	0.646704	1.73722	0.00635593	0.0377072
GO_REGULATION_OF_PRODUCTION_OF_MOLECULAR_MEDIATOR_OF_IMMUNE_RESPONSE	GO:0002700	0.636449	1.79879	0.00202429	0.0289376	0.609582	1.75	0.00407332	0.0428364
GO_PLACENTA_DEVELOPMENT	GO:0001890	0.503483	1.79862	0.00200803	0.0285778	0.504041	1.7968	0	0.0546994
GO_ESTABLISHMENT_OR_MAINTENANCE_OF_CELL_POLARITY	GO:0007163	0.528669	1.79853	0.00200803	0.0283885	0.522944	1.76528	0.002079	0.0442263
GO_INNATE_IMMUNE_RESPONSE_ACTIVATING_CELL_SURFACE_RECEPTOR_SIGNALING_PATHWAY	GO:0002220	0.439429	1.79841	0.00618557	0.0282389	0.427174	1.75673	0.00823045	0.0448196
GO_CELLULAR_RESPONSE_TO_HYDROGEN_PEROXIDE	GO:0070301	0.630706	1.797	0	0.0282598	0.616911	1.75287	0	0.04384
GO_REGULATION_OF_PROTEIN_LOCALIZATION_TO_PLASMA_MEMBRANE	GO:1903076	0.50907	1.79645	0	0.0282173	0.483125	1.73295	0.00416667	0.0358886
GO_POSITIVE_REGULATION_OF_CELL_CYCLE_ARREST	GO:0071158	0.603073	1.79605	0	0.0281541	0.592442	1.73049	0.00206186	0.0356822
GO_KINASE_REGULATOR_ACTIVITY	GO:0019207	0.539362	1.7956	0	0.0281422	0.531929	1.73636	0	0.0372904
GO_ENDOMEMBRANE_SYSTEM_ORGANIZATION	GO:0010256	0.429338	1.7952	0.00198807	0.0281035	0.425821	1.77952	0	0.0477076
GO_POSITIVE_REGULATION_OF_DNA_METABOLIC_PROCESS	GO:0051054	0.464023	1.79452	0	0.0281828	0.452914	1.79834	0.00204499	0.0572684
GO_CELL_CYCLE_G1_S_PHASE_TRANSITION	GO:0044843	0.609668	1.79415	0	0.0279118	0.597466	1.74963	0.00205761	0.0424565
GO_DNA_BIOSYNTHETIC_PROCESS	GO:0071897	0.517597	1.7938	0.00204082	0.0278365	0.509071	1.74573	0.00417537	0.0412297
GO_ATPASE_ACTIVITY_COUPLED	GO:0042623	0.440161	1.79369	0	0.0276914	0.42542	1.74515	0.00208768	0.041099
GO_HOMEOSTASIS_OF_NUMBER_OF_CELLS	GO:0048872	0.553195	1.79336	0.0020202	0.0276143	0.547235	1.74121	0.00423729	0.0404487
GO_CELL_CORTEX_PART	GO:0044448	0.455318	1.79312	0.00211864	0.0274808	0.461378	1.79021	0.0043956	0.0515536
GO_RUFFLE_MEMBRANE	GO:0032587	0.530485	1.79198	0.00793651	0.0273222	0.523123	1.76811	0.00211864	0.0453815
GO_NEGATIVE_REGULATION_OF_NF_KAPPAB_TRANSCRIPTION_FACTOR_ACTIVITY	GO:0032088	0.62312	1.79156	0.00200401	0.0272332	0.60642	1.73974	0.00212766	0.0389515
GO_REGULATION_OF_CELL_PROJECTION_ASSEMBLY	GO:0060491	0.557059	1.79113	0	0.0272179	0.564718	1.79153	0	0.0525399
GO_PROTEASOMAL_PROTEIN_CATABOLIC_PROCESS	GO:0010498	0.416256	1.79088	0.00398406	0.0271687	0.410937	1.76786	0.00609756	0.044798
GO_RAS_PROTEIN_SIGNAL_TRANSDUCTION	GO:0007265	0.486552	1.79035	0.00199601	0.0271086	0.483112	1.75343	0.00211864	0.0441802
GO_CILIARY_BASAL_BODY_PLASMA_MEMBRANE_DOCKING	GO:0097711	0.579772	1.79014	0	0.0269891	0.578195	1.79507	0.00206186	0.0532779
GO_CELL_DEATH_IN_RESPONSE_TO_OXIDATIVE_STRESS	GO:0036473	0.534479	1.78956	0	0.0269651	0.514193	1.70492	0.00214133	0.032313
GO_POSITIVE_REGULATION_OF_ESTABLISHMENT_OF_PROTEIN_LOCALIZATION	GO:1904951	0.494418	1.78953	0.00201207	0.0268168	0.477992	1.71532	0.00213675	0.0327304
GO_NEGATIVE_REGULATION_OF_INTRINSIC_APOPTOTIC_SIGNALING_PATHWAY	GO:2001243	0.545608	1.78902	0	0.0266545	0.53942	1.77682	0	0.0481776
GO_RESPONSE_TO_VIRUS	GO:0009615	0.58364	1.7884	0.002	0.0264928	0.559865	1.71629	0.00835073	0.033042
GO_NEGATIVE_REGULATION_OF_PROTEIN_SERINE_THREONINE_KINASE_ACTIVITY	GO:0071901	0.512915	1.78779	0	0.02644	0.505603	1.73423	0.00218341	0.0360772
GO_SPECIFIC_GRANULE	GO:0042581	0.557293	1.78775	0	0.0262939	0.535409	1.72083	0.00639659	0.0340456
GO_REGULATION_OF_VIRAL_TRANSCRIPTION	GO:0046782	0.514802	1.78676	0.00409836	0.0263321	0.516205	1.81811	0.00424628	0.0644579
GO_REPLICATION_FORK	GO:0005657	0.636407	1.78599	0.00604839	0.0264373	0.635134	1.72799	0.00214592	0.0348384
GO_REGULATION_OF_PROTEIN_COMPLEX_ASSEMBLY	GO:0043254	0.459123	1.78568	0.0040404	0.0263651	0.452389	1.74667	0	0.0418096
GO_NEGATIVE_REGULATION_OF_CELL_ADHESION	GO:0007162	0.600401	1.78567	0	0.0262234	0.595388	1.78709	0	0.0508241
GO_REGULATION_OF_PROTEIN_SERINE_THREONINE_KINASE_ACTIVITY	GO:0071900	0.498293	1.78541	0	0.0261199	0.490453	1.74482	0.0021097	0.0409602
GO_LATE_ENDOSOME	GO:0005770	0.414042	1.78538	0.00590551	0.0259868	0.394618	1.69238	0.00821355	0.031582
GO_CILIUM_ORGANIZATION	GO:0044782	0.450336	1.78486	0	0.0259816	0.462646	1.83753	0	0.0980994
GO_RUFFLE_ORGANIZATION	GO:0031529	0.617226	1.78467	0.00398406	0.0259138	0.620681	1.78022	0.00208333	0.048574
GO_NON_MOTILE_CILIUM_ASSEMBLY	GO:1905515	0.623356	1.78466	0.0020284	0.0257781	0.617222	1.83752	0.00197628	0.0948294
GO_PLATELET_DEGRANULATION	GO:0002576	0.588266	1.7837	0.00403226	0.0257314	0.599469	1.79271	0	0.0524515
GO_REGULATION_OF_VIRAL_LIFE_CYCLE	GO:1903900	0.637084	1.78314	0.00199203	0.0258277	0.623264	1.76271	0	0.0442095
GO_MITOTIC_NUCLEAR_DIVISION	GO:0140014	0.644196	1.78274	0.00205761	0.0257619	0.628451	1.67596	0.00645161	0.0315674
GO_SOMATIC_RECOMBINATION_OF_IMMUNOGLOBULIN_GENE_SEGMENTS	GO:0016447	0.588416	1.78246	0	0.0256689	0.582175	1.83679	0.0020202	0.0869973
GO_CYTOKINESIS	GO:0000910	0.500531	1.78215	0.0021097	0.0255224	0.480297	1.66013	0.00865801	0.0318693
GO_REGULATION_OF_CELL_KILLING	GO:0031341	0.68135	1.78106	0.0019802	0.0256633	0.640578	1.66512	0.00863931	0.0317375
GO_INTRINSIC_APOPTOTIC_SIGNALING_PATHWAY_IN_RESPONSE_TO_DNA_DAMAGE	GO:0008630	0.513593	1.78059	0	0.0256402	0.499483	1.69252	0.00422833	0.0316313
GO_PRODUCTION_OF_MOLECULAR_MEDIATOR_OF_IMMUNE_RESPONSE	GO:0002440	0.663101	1.7803	0.00202429	0.0255436	0.639268	1.74223	0.00806452	0.0404476
GO_NUCLEAR_PERIPHERY	GO:0034399	0.541976	1.78008	0	0.025473	0.535446	1.78622	0.00200401	0.0505728
GO_ANATOMICAL_STRUCTURE_HOMEOSTASIS	GO:0060249	0.453365	1.77995	0	0.0254319	0.442841	1.73945	0	0.0387086
GO_REGULATION_OF_REACTIVE_OXYGEN_SPECIES_METABOLIC_PROCESS	GO:2000377	0.556187	1.77972	0	0.0253994	0.556348	1.81637	0.00410678	0.0637812
GO_RESPONSE_TO_OXYGEN_LEVELS	GO:0070482	0.46199	1.77971	0	0.0252853	0.459951	1.75636	0	0.0446703
GO_POSITIVE_REGULATION_OF_CYTOKINE_PRODUCTION	GO:0001819	0.585318	1.77961	0.00203252	0.0251907	0.564542	1.72941	0.00430108	0.0355376
GO_ORGANELLE_MEMBRANE_FUSION	GO:0090174	0.508317	1.77947	0.00616016	0.0250912	0.499986	1.76605	0.00627615	0.0448149
GO_PROTEIN_POLYMERIZATION	GO:0051258	0.500161	1.77907	0.00409836	0.0250831	0.493976	1.71924	0.00645161	0.0336545
GO_SECRETORY_GRANULE_MEMBRANE	GO:0030667	0.504884	1.77898	0.00204918	0.024968	0.490078	1.75279	0.00632911	0.0435904
GO_VACUOLAR_MEMBRANE	GO:0005774	0.439092	1.77866	0.00612245	0.0249274	0.426519	1.75607	0.00211416	0.0439579
GO_IN_UTERO_EMBRYONIC_DEVELOPMENT	GO:0001701	0.458439	1.77865	0	0.0248093	0.455963	1.72856	0	0.0347474
GO_REGULATION_OF_CYSTEINE_TYPE_ENDOPEPTIDASE_ACTIVITY	GO:2000116	0.529246	1.77861	0.00207039	0.0246923	0.512206	1.74802	0.00409836	0.0420331
GO_POSITIVE_REGULATION_OF_MITOCHONDRION_ORGANIZATION	GO:0010822	0.475054	1.77739	0.00207039	0.0246469	0.455715	1.71657	0.0040404	0.0332516
GO_REGULATION_OF_DNA_METABOLIC_PROCESS	GO:0051052	0.433173	1.77689	0	0.0245425	0.421408	1.72882	0.00210526	0.0350387
GO_NEGATIVE_REGULATION_OF_CYTOKINE_SECRETION	GO:0050710	0.729501	1.77641	0	0.0244423	0.723762	1.7946	0	0.0524663
GO_REGULATION_OF_NUCLEOBASE_CONTAINING_COMPOUND_METABOLIC_PROCESS	GO:0019219	0.394689	1.77546	0	0.0244047	0.376987	1.72514	0.00201613	0.0341734
GO_SIGNAL_TRANSDUCTION_INVOLVED_IN_CELL_CYCLE_CHECKPOINT	GO:0072395	0.669306	1.77539	0	0.0243358	0.658196	1.7198	0	0.034031
GO_PROTEIN_LOCALIZATION_TO_PLASMA_MEMBRANE	GO:0072659	0.461479	1.77509	0	0.0242827	0.463069	1.83178	0	0.0825393
GO_POSITIVE_REGULATION_OF_PROTEIN_LOCALIZATION_TO_MEMBRANE	GO:1905477	0.53044	1.77457	0	0.0240643	0.521107	1.75134	0	0.0439323
GO_MEMBRANE_LIPID_METABOLIC_PROCESS	GO:0006643	0.471184	1.7739	0	0.0240214	0.466693	1.73618	0.00210526	0.0371919
GO_CELLULAR_RESPONSE_TO_RADIATION	GO:0071478	0.473807	1.77289	0	0.0241293	0.468203	1.74427	0.00205761	0.040588
GO_NEGATIVE_REGULATION_OF_CYTOKINE_PRODUCTION	GO:0001818	0.582505	1.77268	0.00206186	0.0240859	0.559992	1.7154	0.00851064	0.0330009
GO_RESPONSE_TO_REACTIVE_OXYGEN_SPECIES	GO:0000302	0.558834	1.7721	0	0.0237298	0.560841	1.74306	0.00211864	0.0402529
GO_REGULATION_OF_PROTEIN_BINDING	GO:0043393	0.467	1.77195	0.00398406	0.0236593	0.472127	1.78013	0	0.048172
GO_GTPASE_ACTIVITY	GO:0003924	0.441382	1.77183	0.00201613	0.0234863	0.442504	1.797	0.00208333	0.0552977
GO_NEGATIVE_REGULATION_OF_CELL_CYCLE_G1_S_PHASE_TRANSITION	GO:1902807	0.637632	1.77182	0	0.0233929	0.625697	1.72434	0.00614754	0.0340828
GO_POSITIVE_REGULATION_OF_CYTOSKELETON_ORGANIZATION	GO:0051495	0.503813	1.77139	0	0.0234319	0.507657	1.74074	0	0.040238
GO_POSITIVE_REGULATION_OF_BINDING	GO:0051099	0.465683	1.77095	0.00209205	0.0234424	0.462877	1.75504	0	0.0437671
GO_REGULATION_OF_CELLULAR_PROTEIN_CATABOLIC_PROCESS	GO:1903362	0.406821	1.77073	0.00595238	0.0232751	0.398366	1.74051	0.00814664	0.0397212
GO_CYTOPLASMIC_REGION	GO:0099568	0.407188	1.77063	0	0.0232106	0.420257	1.8138	0	0.0615186
GO_RESPONSE_TO_UV	GO:0009411	0.56115	1.76991	0	0.0232681	0.549083	1.75078	0	0.0433517
GO_CELLULAR_RESPONSE_TO_UV	GO:0034644	0.631769	1.76978	0	0.0231871	0.627636	1.78008	0	0.0477605
GO_NEGATIVE_REGULATION_OF_INTRACELLULAR_SIGNAL_TRANSDUCTION	GO:1902532	0.485793	1.76976	0	0.0231059	0.484693	1.72994	0	0.0356926
GO_CLEAVAGE_FURROW	GO:0032154	0.602412	1.76953	0.00424628	0.0229515	0.587524	1.69646	0.00429185	0.0319405
GO_NUCLEAR_DNA_REPLICATION	GO:0033260	0.653446	1.76941	0.00613497	0.0228917	0.631509	1.64901	0.00842105	0.0321372
GO_ORGANELLE_FUSION	GO:0048284	0.486903	1.7692	0.00408998	0.0228373	0.485122	1.77544	0.00207469	0.0468474
GO_MICROTUBULE	GO:0005874	0.477009	1.76913	0	0.022751	0.473801	1.73395	0.00210526	0.0358479
GO_G1_DNA_DAMAGE_CHECKPOINT	GO:0044783	0.668929	1.76911	0	0.0226614	0.65211	1.67174	0.00412371	0.032035
GO_POSITIVE_REGULATION_OF_CELL_ADHESION	GO:0045785	0.592057	1.76905	0.00203666	0.0225869	0.575593	1.7399	0.00632911	0.0390738
GO_CYTOKINE_PRODUCTION_INVOLVED_IN_IMMUNE_RESPONSE	GO:0002367	0.691311	1.76767	0.00197628	0.0225922	0.673741	1.74657	0	0.0416296
GO_NEGATIVE_REGULATION_OF_CELL_CELL_ADHESION	GO:0022408	0.622422	1.76744	0.00198807	0.0225208	0.610555	1.75594	0.00206186	0.0438021
GO_TUBULIN_BINDING	GO:0015631	0.470462	1.76739	0	0.0224461	0.469413	1.74765	0	0.0419698
GO_RESPONSE_TO_INTERLEUKIN_1	GO:0070555	0.557429	1.76671	0.00203252	0.0225288	0.54197	1.71771	0.00851064	0.0332753
GO_CYTOSKELETON_DEPENDENT_INTRACELLULAR_TRANSPORT	GO:0030705	0.461376	1.76623	0.0019802	0.0225161	0.46956	1.81953	0.00601202	0.0659023
GO_POSITIVE_REGULATION_OF_CELL_CYCLE	GO:0045787	0.522244	1.76572	0	0.022515	0.507666	1.73406	0.00410678	0.0359612
GO_CYTOKINE_SECRETION	GO:0050663	0.637854	1.76569	0	0.022434	0.619184	1.7264	0.00425532	0.0342756
GO_NEGATIVE_REGULATION_OF_PROTEIN_CATABOLIC_PROCESS	GO:0042177	0.411228	1.76528	0	0.0224029	0.400445	1.68524	0.00414938	0.0314862
GO_NEGATIVE_REGULATION_OF_MULTI_ORGANISM_PROCESS	GO:0043901	0.572348	1.76295	0	0.0225353	0.548465	1.71438	0.00431035	0.0327055
GO_INTRINSIC_APOPTOTIC_SIGNALING_PATHWAY_BY_P53_CLASS_MEDIATOR	GO:0072332	0.514919	1.76281	0.00206612	0.0224892	0.504723	1.73756	0.00412371	0.037712
GO_POSITIVE_REGULATION_OF_CYSTEINE_TYPE_ENDOPEPTIDASE_ACTIVITY	GO:2001056	0.506929	1.76255	0	0.0224726	0.49484	1.75882	0.00413223	0.0446029
GO_POSITIVE_REGULATION_OF_CHROMOSOME_ORGANIZATION	GO:2001252	0.447104	1.76252	0.00408998	0.0223946	0.430142	1.70575	0.00594059	0.0325874
GO_PROTEIN_DNA_COMPLEX_SUBUNIT_ORGANIZATION	GO:0071824	0.484527	1.76239	0	0.0223666	0.463153	1.69343	0.00824742	0.0315549
GO_GUANYL_NUCLEOTIDE_BINDING	GO:0019001	0.435834	1.76226	0	0.0223322	0.437336	1.79295	0	0.0527886
GO_MEMBRANE_REGION	GO:0098589	0.480713	1.76176	0.0019685	0.022189	0.470524	1.71545	0.00843882	0.0330709
GO_HELICASE_ACTIVITY	GO:0004386	0.522456	1.76161	0.0020202	0.0221627	0.503487	1.71332	0.00625	0.0326258
GO_POSITIVE_REGULATION_OF_WNT_SIGNALING_PATHWAY	GO:0030177	0.488167	1.76012	0	0.0222378	0.48691	1.78174	0.00204918	0.0492052
GO_REGULATION_OF_GTPASE_ACTIVITY	GO:0043087	0.508694	1.7578	0	0.0224804	0.498031	1.74859	0.00207469	0.0422543
GO_NEGATIVE_REGULATION_OF_PEPTIDE_SECRETION	GO:0002792	0.551827	1.75732	0	0.0225189	0.534243	1.71181	0.00212314	0.0327338
GO_POSITIVE_REGULATION_OF_PEPTIDASE_ACTIVITY	GO:0010952	0.469918	1.75728	0	0.0224675	0.455219	1.72929	0.00207469	0.0352992
GO_NEGATIVE_REGULATION_OF_PHOSPHORYLATION	GO:0042326	0.473657	1.75708	0	0.0223623	0.470266	1.73581	0.00210526	0.0367827
GO_PLATELET_ACTIVATION	GO:0030168	0.572142	1.75703	0.00403226	0.0222886	0.56716	1.74749	0.00214592	0.0417729
GO_ESTABLISHMENT_OF_PROTEIN_LOCALIZATION_TO_MEMBRANE	GO:0090150	0.378215	1.75688	0.00205761	0.0222259	0.381342	1.80431	0.00408998	0.0559041
GO_REGULATION_OF_NUCLEAR_DIVISION	GO:0051783	0.613726	1.7564	0.00199601	0.0221518	0.611343	1.69108	0.00645161	0.0316167
GO_CELLULAR_RESPONSE_TO_BIOTIC_STIMULUS	GO:0071216	0.610816	1.75632	0.0040568	0.0220873	0.595167	1.71388	0.00649351	0.0325882
GO_REGULATION_OF_ORGANELLE_ASSEMBLY	GO:1902115	0.424485	1.75582	0.00198807	0.0221032	0.417832	1.74037	0.00205339	0.0395944
GO_SPHINGOLIPID_BIOSYNTHETIC_PROCESS	GO:0030148	0.544797	1.75558	0	0.0220956	0.544552	1.72879	0	0.0349111
GO_REGULATION_OF_CYTOKINE_PRODUCTION_INVOLVED_IN_IMMUNE_RESPONSE	GO:0002718	0.717854	1.75554	0.00196464	0.022028	0.694911	1.70958	0.00410678	0.0331427
GO_POSITIVE_REGULATION_OF_PROTEIN_COMPLEX_ASSEMBLY	GO:0031334	0.469296	1.75401	0.00601202	0.0221538	0.456953	1.67791	0.0021322	0.0314835
GO_NEGATIVE_REGULATION_OF_IMMUNE_SYSTEM_PROCESS	GO:0002683	0.559203	1.75293	0.00205339	0.0221764	0.545773	1.7347	0.00842105	0.0365191
GO_FC_RECEPTOR_SIGNALING_PATHWAY	GO:0038093	0.646548	1.75238	0	0.0222569	0.624673	1.71408	0.00840336	0.0326382
GO_POSITIVE_REGULATION_OF_MITOTIC_CELL_CYCLE	GO:0045931	0.609538	1.75228	0	0.0221984	0.597901	1.73956	0.00614754	0.0388513
GO_POSITIVE_REGULATION_OF_INTRACELLULAR_PROTEIN_TRANSPORT	GO:0090316	0.4603	1.75196	0.0040568	0.022149	0.448578	1.72932	0.00208333	0.0354172
GO_RESPONSE_TO_ANTIBIOTIC	GO:0046677	0.49768	1.7517	0	0.0221407	0.501711	1.77174	0	0.0462393
GO_AMEBOIDAL_TYPE_CELL_MIGRATION	GO:0001667	0.492127	1.75158	0.00201207	0.0220857	0.498665	1.75123	0.00424628	0.0437085
GO_MICROTUBULE_BINDING	GO:0008017	0.484608	1.75116	0.00205339	0.0220614	0.480519	1.71653	0	0.0331588
GO_REGULATION_OF_HEMOPOIESIS	GO:1903706	0.506216	1.75032	0.00407332	0.0220778	0.494641	1.72508	0.00636943	0.0340716
GO_CELL_CYCLE_DNA_REPLICATION	GO:0044786	0.647451	1.75011	0.00408998	0.0219948	0.630999	1.64819	0.00630252	0.0321082
GO_NEGATIVE_REGULATION_OF_KINASE_ACTIVITY	GO:0033673	0.463	1.74873	0.0039604	0.0221772	0.46487	1.75064	0.00430108	0.0430031
GO_RETROGRADE_VESICLE_MEDIATED_TRANSPORT_GOLGI_TO_ENDOPLASMIC_RETICULUM	GO:0006890	0.589793	1.74866	0	0.0221161	0.574911	1.6804	0.00641026	0.0313726
GO_CHROMATIN_REMODELING	GO:0006338	0.501188	1.74847	0.00203252	0.0220825	0.488635	1.68726	0.00209644	0.0314401
GO_POSITIVE_REGULATION_OF_RESPONSE_TO_EXTERNAL_STIMULUS	GO:0032103	0.606311	1.74718	0	0.0221637	0.598115	1.73225	0.00215517	0.035859
GO_NEGATIVE_REGULATION_OF_MAPK_CASCADE	GO:0043409	0.504072	1.74633	0	0.0221147	0.484901	1.68161	0.00209644	0.0313895
GO_MEMBRANE_LIPID_BIOSYNTHETIC_PROCESS	GO:0046467	0.491087	1.7463	0	0.0220472	0.494816	1.73483	0.00212766	0.0366254
GO_REGULATION_OF_ERBB_SIGNALING_PATHWAY	GO:1901184	0.496387	1.74617	0.00196078	0.0220213	0.515975	1.74896	0.00215983	0.0425873
GO_REGULATION_OF_CELL_CELL_ADHESION	GO:0022407	0.604023	1.74602	0.00204082	0.0219122	0.581578	1.73516	0.00613497	0.0367754
GO_POSITIVE_REGULATION_OF_PRODUCTION_OF_MOLECULAR_MEDIATOR_OF_IMMUNE_RESPONSE	GO:0002702	0.613933	1.74565	0.00400802	0.0218501	0.594222	1.69742	0.00614754	0.032033
GO_REGULATION_OF_SUPRAMOLECULAR_FIBER_ORGANIZATION	GO:1902903	0.502571	1.74537	0.00200401	0.0217817	0.502842	1.70961	0.0063425	0.0332365
GO_RUFFLE	GO:0001726	0.51868	1.7453	0.00803213	0.0217243	0.509337	1.69733	0.00862069	0.0319019
GO_NEGATIVE_REGULATION_OF_LEUKOCYTE_DIFFERENTIATION	GO:1902106	0.540145	1.74488	0.00404858	0.0217101	0.530294	1.73757	0.00428265	0.0378796
GO_CELLULAR_RESPONSE_TO_DRUG	GO:0035690	0.487475	1.74414	0	0.0218028	0.48523	1.72195	0.00211416	0.0337902
GO_NEGATIVE_REGULATION_OF_RESPONSE_TO_CYTOKINE_STIMULUS	GO:0060761	0.604478	1.74375	0.00619835	0.0216971	0.593267	1.70422	0.00210526	0.0322234
GO_B_CELL_ACTIVATION_INVOLVED_IN_IMMUNE_RESPONSE	GO:0002312	0.600927	1.74366	0.0019685	0.0216438	0.597477	1.78873	0.00608519	0.0511849
GO_TISSUE_MIGRATION	GO:0090130	0.514991	1.74363	0	0.0215874	0.524428	1.72353	0.00214592	0.0337689
GO_CYTOPLASMIC_MICROTUBULE	GO:0005881	0.515331	1.74355	0.00420168	0.0215398	0.502643	1.66898	0.00635593	0.0321042
GO_NUCLEAR_SPECK	GO:0016607	0.392306	1.74332	0.00594059	0.0215282	0.378508	1.69879	0.00788955	0.0323142
GO_COAGULATION	GO:0050817	0.505887	1.74323	0.00204499	0.0214971	0.506385	1.75629	0.0021645	0.0444337
GO_REGULATION_OF_MICROTUBULE_BASED_PROCESS	GO:0032886	0.49053	1.74291	0	0.0214434	0.487309	1.69607	0.00215983	0.0318257
GO_CELL_CYCLE_ARREST	GO:0007050	0.475763	1.74115	0	0.0216403	0.471664	1.73259	0.002079	0.0358674
GO_FIBROBLAST_PROLIFERATION	GO:0048144	0.639751	1.741	0	0.0216069	0.623214	1.67505	0.00211416	0.0316864
GO_REGULATION_OF_CELL_CYCLE_ARREST	GO:0071156	0.53935	1.74059	0	0.0216148	0.529194	1.68007	0.00416667	0.031437
GO_CELLULAR_RESPONSE_TO_ABIOTIC_STIMULUS	GO:0071214	0.458393	1.74048	0	0.0215703	0.454385	1.70487	0	0.0322386
GO_REGULATION_OF_CELLULAR_COMPONENT_SIZE	GO:0032535	0.465369	1.73995	0	0.0216789	0.458083	1.70566	0.00845666	0.0323435
GO_CELLULAR_RESPONSE_TO_AMINO_ACID_STIMULUS	GO:0071230	0.615326	1.73961	0.00203666	0.0216372	0.600391	1.72766	0.00609756	0.0347825
GO_REGULATION_OF_ACTIN_FILAMENT_ORGANIZATION	GO:0110053	0.501909	1.73858	0.00203252	0.0216232	0.502416	1.70576	0.00845666	0.0326777
GO_MEMBRANE_FUSION	GO:0061025	0.460046	1.73833	0.00614754	0.0215927	0.448817	1.70867	0.00436681	0.0332287
GO_NEGATIVE_REGULATION_OF_ESTABLISHMENT_OF_PROTEIN_LOCALIZATION	GO:1904950	0.509265	1.73813	0	0.0215761	0.500026	1.7099	0.00845666	0.033248
GO_ESTABLISHMENT_OF_ORGANELLE_LOCALIZATION	GO:0051656	0.402184	1.73762	0	0.021605	0.404834	1.79856	0	0.0577822
GO_RESPONSE_TO_MOLECULE_OF_BACTERIAL_ORIGIN	GO:0002237	0.587846	1.73725	0.00205339	0.0216146	0.577329	1.70694	0	0.0329084
GO_INTEGRIN_MEDIATED_SIGNALING_PATHWAY	GO:0007229	0.645323	1.7371	0.00419287	0.0215765	0.635715	1.69406	0.00865801	0.0316242
GO_CELL_DIVISION_SITE	GO:0032153	0.571774	1.73624	0.00638298	0.0216594	0.563598	1.68669	0.00641026	0.0314183
GO_VESICLE_DOCKING	GO:0048278	0.49052	1.73587	0.00408163	0.0215803	0.510141	1.80802	0.00416667	0.0594426
GO_RESPONSE_TO_GAMMA_RADIATION	GO:0010332	0.639434	1.73557	0.0059761	0.021596	0.640897	1.68653	0.00630252	0.0314273
GO_REGULATION_OF_ESTABLISHMENT_OF_PLANAR_POLARITY	GO:0090175	0.535567	1.73525	0.00398406	0.0216353	0.542979	1.7685	0.00829876	0.0459105
GO_CELLULAR_RESPONSE_TO_IONIZING_RADIATION	GO:0071479	0.597832	1.73519	0.00205339	0.0215937	0.589451	1.69905	0	0.0324926
GO_INTERACTION_WITH_SYMBIONT	GO:0051702	0.619357	1.73507	0.00203252	0.0215872	0.623959	1.75542	0.00209205	0.0438966
GO_STRESS_ACTIVATED_PROTEIN_KINASE_SIGNALING_CASCADE	GO:0031098	0.499296	1.7342	0	0.0216997	0.495673	1.72416	0	0.0340057
GO_POSITIVE_REGULATION_OF_GTPASE_ACTIVITY	GO:0043547	0.503568	1.73324	0	0.0218021	0.495534	1.72676	0.00208333	0.0342667
GO_CORTICAL_CYTOSKELETON	GO:0030863	0.477086	1.73208	0.00201613	0.0219216	0.481282	1.70843	0.00842105	0.0329083
GO_MYELOID_CELL_DIFFERENTIATION	GO:0030099	0.485147	1.73017	0.00204918	0.0220753	0.472288	1.68245	0.00211864	0.0314342
GO_POSITIVE_REGULATION_OF_SMOOTH_MUSCLE_CELL_PROLIFERATION	GO:0048661	0.601574	1.72931	0	0.022058	0.589183	1.70327	0.004158	0.0323733
GO_RHO_PROTEIN_SIGNAL_TRANSDUCTION	GO:0007266	0.499974	1.72859	0.00409836	0.0221618	0.490005	1.68486	0.00829876	0.0315023
GO_REGULATION_OF_EPITHELIAL_CELL_MIGRATION	GO:0010632	0.513238	1.72788	0.0020284	0.0222625	0.514176	1.74399	0.00205761	0.040292
GO_PROTEASE_BINDING	GO:0002020	0.521678	1.72769	0.00208333	0.0222766	0.522443	1.72528	0.00438597	0.0342351
GO_EPITHELIAL_CELL_PROLIFERATION	GO:0050673	0.487314	1.72742	0	0.0222813	0.49953	1.77264	0.00210084	0.0463072
GO_ORGANELLE_TRANSPORT_ALONG_MICROTUBULE	GO:0072384	0.483183	1.72612	0.00596422	0.0224405	0.490148	1.76204	0.00209644	0.0442597
GO_AMINOGLYCAN_BIOSYNTHETIC_PROCESS	GO:0006023	0.558409	1.72605	0.004158	0.0224477	0.561692	1.72334	0.00647948	0.0336335
GO_NEGATIVE_REGULATION_OF_LOCOMOTION	GO:0040013	0.51898	1.72582	0.00201613	0.0224333	0.52489	1.72594	0.00421941	0.0341704
GO_CELLULAR_RESPONSE_TO_MECHANICAL_STIMULUS	GO:0071260	0.654621	1.72514	0.00201207	0.0224371	0.638191	1.65356	0.00831601	0.0321725
GO_TIGHT_JUNCTION_ORGANIZATION	GO:0120193	0.552098	1.72449	0.00642398	0.0225621	0.530642	1.66347	0.00849257	0.0318661
GO_REGULATION_OF_VIRAL_GENOME_REPLICATION	GO:0045069	0.649102	1.72436	0.00203252	0.0225293	0.622395	1.69484	0.00404858	0.0317811
GO_REGULATION_OF_INTRACELLULAR_PROTEIN_TRANSPORT	GO:0033157	0.410441	1.72433	0.00408998	0.0224883	0.405925	1.73992	0	0.039237
GO_REGULATION_OF_DNA_REPLICATION	GO:0006275	0.594735	1.72371	0.00205339	0.0225993	0.588049	1.70174	0.00414938	0.0321131
GO_REGULATION_OF_SMALL_GTPASE_MEDIATED_SIGNAL_TRANSDUCTION	GO:0051056	0.473882	1.72319	0.00821355	0.0226581	0.462588	1.67856	0.00824742	0.0314443
GO_POSITIVE_REGULATION_OF_INTRACELLULAR_TRANSPORT	GO:0032388	0.440838	1.72258	0	0.0226454	0.433956	1.73609	0.00208333	0.0368789
GO_FIBRILLAR_CENTER	GO:0001650	0.463021	1.72229	0.00203252	0.0225994	0.459249	1.74066	0.00205761	0.0398592
GO_POSITIVE_REGULATION_OF_DNA_BINDING_TRANSCRIPTION_FACTOR_ACTIVITY	GO:0051091	0.470164	1.72198	0.0059761	0.0224867	0.462894	1.70681	0.00619835	0.0327385
GO_PROTEIN_LOCALIZATION_TO_CELL_PERIPHERY	GO:1990778	0.429092	1.72101	0	0.0226026	0.435787	1.77471	0	0.0468288
GO_LEUKOCYTE_DIFFERENTIATION	GO:0002521	0.563264	1.72072	0.00206186	0.0226238	0.548731	1.71252	0.00623701	0.0325909
GO_GOLGI_VESICLE_TRANSPORT	GO:0048193	0.434096	1.72067	0.0041841	0.0225702	0.423948	1.71916	0.00621118	0.0334911
GO_LEUKOCYTE_HOMEOSTASIS	GO:0001776	0.695487	1.71956	0.002	0.0227653	0.686641	1.6987	0.00429185	0.0322679
GO_MORPHOGENESIS_OF_A_POLARIZED_EPITHELIUM	GO:0001738	0.504981	1.71947	0.00408998	0.0227336	0.512827	1.78254	0.00414079	0.0495215
GO_RESPONSE_TO_TRANSFORMING_GROWTH_FACTOR_BETA	GO:0071559	0.52703	1.71946	0	0.0226802	0.525233	1.74121	0.00411523	0.0402504
GO_MACROPHAGE_ACTIVATION	GO:0042116	0.625552	1.71876	0.00201207	0.0227292	0.60061	1.65604	0.00421053	0.031982
GO_REGULATION_OF_MAP_KINASE_ACTIVITY	GO:0043405	0.493362	1.71876	0.00407332	0.0226763	0.48724	1.68107	0.00642398	0.0312968
GO_CORTICAL_ACTIN_CYTOSKELETON	GO:0030864	0.504792	1.71762	0.00408998	0.0228306	0.506785	1.72397	0.00618557	0.0337315
GO_PEPTIDYL_SERINE_MODIFICATION	GO:0018209	0.431918	1.71749	0	0.0228066	0.429083	1.73435	0.00210526	0.036187
GO_MODIFICATION_OF_MORPHOLOGY_OR_PHYSIOLOGY_OF_OTHER_ORGANISM_INVOLVED_IN_SYMBIOTIC_INTERACTION	GO:0051817	0.572683	1.71663	0	0.0228016	0.573575	1.76042	0.00204918	0.0440453
GO_REGULATION_OF_RESPONSE_TO_OXIDATIVE_STRESS	GO:1902882	0.489552	1.71404	0.00389864	0.0230195	0.489717	1.73802	0.00613497	0.038069
GO_ESTABLISHMENT_OF_CELL_POLARITY	GO:0030010	0.516587	1.71394	0	0.0230122	0.511449	1.73835	0.00201207	0.0385041
GO_REGULATION_OF_CHROMOSOME_SEPARATION	GO:1905818	0.769818	1.71298	0.00407332	0.0230952	0.740701	1.59418	0.00628931	0.0367042
GO_POSITIVE_REGULATION_OF_PROTEIN_SERINE_THREONINE_KINASE_ACTIVITY	GO:0071902	0.489575	1.71251	0	0.0231282	0.482484	1.68993	0.00421941	0.0313179
GO_POSITIVE_REGULATION_OF_SUPRAMOLECULAR_FIBER_ORGANIZATION	GO:1902905	0.497914	1.7116	0	0.0233455	0.505736	1.68544	0.00431035	0.0314978
GO_REGULATION_OF_CELL_MORPHOGENESIS	GO:0022604	0.429555	1.71131	0.00420168	0.0233452	0.432133	1.72865	0.00213675	0.0348584
GO_POSITIVE_REGULATION_OF_NUCLEAR_DIVISION	GO:0051785	0.546839	1.70977	0.00201613	0.0234294	0.539721	1.6951	0.00414938	0.031749
GO_NEGATIVE_REGULATION_OF_EPITHELIAL_CELL_PROLIFERATION	GO:0050680	0.565539	1.70962	0.0020202	0.0233773	0.554381	1.69661	0.00206186	0.031965
GO_REGULATION_OF_STRESS_ACTIVATED_PROTEIN_KINASE_SIGNALING_CASCADE	GO:0070302	0.493584	1.70943	0	0.0233183	0.497228	1.69006	0	0.0314176
GO_INTERLEUKIN_8_PRODUCTION	GO:0032637	0.674236	1.7088	0.00196464	0.0233034	0.660388	1.66716	0.00218341	0.0321898
GO_PLATELET_AGGREGATION	GO:0070527	0.604736	1.70838	0.00829876	0.0233504	0.599674	1.69435	0.00645161	0.0317562
GO_AGING	GO:0007568	0.461043	1.70807	0	0.0233499	0.450627	1.65844	0.00212766	0.0320507
GO_PHOSPHOLIPID_METABOLIC_PROCESS	GO:0006644	0.481142	1.70801	0.00194175	0.0233097	0.490343	1.7361	0.00408163	0.0370371
GO_ENDOTHELIAL_CELL_MIGRATION	GO:0043542	0.499697	1.70749	0.00806452	0.0232277	0.504303	1.69777	0.00210084	0.0320516
GO_PROTEIN_AUTOPHOSPHORYLATION	GO:0046777	0.483401	1.70721	0.00201207	0.0231396	0.483562	1.69943	0	0.0324692
GO_NEGATIVE_REGULATION_OF_BINDING	GO:0051100	0.473877	1.70711	0.00201613	0.023121	0.478946	1.71956	0	0.03378
GO_POSITIVE_REGULATION_OF_EPITHELIAL_CELL_MIGRATION	GO:0010634	0.536837	1.70709	0.00204499	0.0230753	0.538347	1.70851	0.00422833	0.0330774
GO_SMOOTH_MUSCLE_CELL_MIGRATION	GO:0014909	0.618097	1.70696	0.00596422	0.0230611	0.625223	1.71894	0.00421941	0.033229
GO_ENDOTHELIAL_CELL_PROLIFERATION	GO:0001935	0.496442	1.70671	0	0.0230886	0.490627	1.66956	0.0021322	0.0319793
GO_CELL_LEADING_EDGE	GO:0031252	0.46091	1.70649	0.00201207	0.023067	0.459343	1.69414	0.00838574	0.0317306
GO_POSITIVE_REGULATION_OF_CELLULAR_COMPONENT_BIOGENESIS	GO:0044089	0.431643	1.70589	0.00201613	0.0231287	0.427492	1.66686	0.00632911	0.0319525
GO_ERK1_AND_ERK2_CASCADE	GO:0070371	0.548263	1.70583	0	0.0230973	0.539663	1.69883	0	0.0323909
GO_REACTIVE_OXYGEN_SPECIES_METABOLIC_PROCESS	GO:0072593	0.506993	1.70578	0.00211416	0.0230147	0.500825	1.72278	0.00421053	0.0337247
GO_CENTRIOLE	GO:0005814	0.523381	1.70573	0.00209205	0.0229764	0.511174	1.68314	0.00625	0.031577
GO_POSITIVE_REGULATION_OF_MITOTIC_NUCLEAR_DIVISION	GO:0045840	0.588217	1.70528	0.00201613	0.0230581	0.589252	1.71318	0.00414938	0.0325863
GO_REGULATION_OF_LIPID_KINASE_ACTIVITY	GO:0043550	0.653517	1.7048	0.00843882	0.0229978	0.63777	1.66358	0.00208333	0.0318958
GO_ORGANELLE_SUBCOMPARTMENT	GO:0031984	0.424259	1.70438	0.00598802	0.0230033	0.428168	1.74197	0.00204082	0.0402993
GO_PROTEIN_SERINE_THREONINE_KINASE_ACTIVITY	GO:0004674	0.418262	1.70429	0	0.0229684	0.415449	1.71529	0	0.032634
GO_POSITIVE_REGULATION_OF_STRESS_ACTIVATED_PROTEIN_KINASE_SIGNALING_CASCADE	GO:0070304	0.513404	1.70313	0	0.0230664	0.526145	1.76131	0	0.0439595
GO_PROTEIN_DEPHOSPHORYLATION	GO:0006470	0.43841	1.70284	0.00199203	0.023093	0.440428	1.69992	0.00408163	0.0323593
GO_REGULATION_OF_DNA_DEPENDENT_DNA_REPLICATION	GO:0090329	0.655985	1.70255	0.00608519	0.0230839	0.645787	1.65724	0.0083682	0.0319674
GO_NEGATIVE_REGULATION_OF_HEMOPOIESIS	GO:1903707	0.476914	1.70184	0.00198807	0.0231799	0.471165	1.71924	0	0.0335442
GO_NEGATIVE_REGULATION_OF_VIRAL_PROCESS	GO:0048525	0.670972	1.70155	0	0.0231932	0.655164	1.71292	0.00821355	0.0325714
GO_CELLULAR_RESPONSE_TO_HEAT	GO:0034605	0.4875	1.70137	0.00596422	0.0230997	0.484898	1.66097	0.00211416	0.031851
GO_REGULATION_OF_LEUKOCYTE_MIGRATION	GO:0002685	0.667231	1.70133	0.00205761	0.0230602	0.660111	1.70136	0.00628931	0.0320591
GO_REGULATION_OF_ENDOTHELIAL_CELL_MIGRATION	GO:0010594	0.506007	1.7013	0.00821355	0.0230256	0.506289	1.70463	0.00416667	0.0322709
GO_MICROTUBULE_POLYMERIZATION_OR_DEPOLYMERIZATION	GO:0031109	0.544466	1.7004	0.00206612	0.023101	0.539955	1.68309	0.00428265	0.0315298
GO_TIGHT_JUNCTION	GO:0070160	0.530297	1.69947	0	0.0231587	0.536118	1.68441	0.00210526	0.0314219
GO_CELL_SUBSTRATE_ADHESION	GO:0031589	0.534251	1.69768	0.00823045	0.0232758	0.541582	1.69761	0.0083682	0.0320275
GO_GLYCOPROTEIN_BIOSYNTHETIC_PROCESS	GO:0009101	0.436477	1.69756	0.00209644	0.0232514	0.431919	1.68166	0	0.031429
GO_MICROTUBULE_BASED_MOVEMENT	GO:0007018	0.414586	1.69729	0	0.0232943	0.415377	1.68133	0.00208333	0.0312872
GO_NEGATIVE_REGULATION_OF_CELLULAR_PROTEIN_LOCALIZATION	GO:1903828	0.479968	1.69707	0	0.023302	0.498291	1.76584	0	0.0445948
GO_SULFUR_COMPOUND_BIOSYNTHETIC_PROCESS	GO:0044272	0.47411	1.69481	0	0.0235963	0.46899	1.7051	0.00413223	0.03243
GO_RAB_PROTEIN_SIGNAL_TRANSDUCTION	GO:0032482	0.499697	1.69479	0	0.0235538	0.49848	1.71976	0.00204918	0.03382
GO_CELLULAR_RESPONSE_TO_LIGHT_STIMULUS	GO:0071482	0.427938	1.69445	0	0.0235961	0.423665	1.67063	0.00429185	0.032037
GO_POSITIVE_REGULATION_OF_CYTOKINE_PRODUCTION_INVOLVED_IN_IMMUNE_RESPONSE	GO:0002720	0.715089	1.69426	0.00201613	0.023625	0.694152	1.66577	0.00617284	0.0318363
GO_ACTIVATION_OF_PROTEIN_KINASE_ACTIVITY	GO:0032147	0.450706	1.69241	0.00204082	0.0238063	0.449306	1.6962	0.00625	0.0318823
GO_DEPHOSPHORYLATION	GO:0016311	0.427568	1.69198	0	0.0237672	0.429574	1.66221	0.00211416	0.0317782
GO_CELLULAR_RESPONSE_TO_ACID_CHEMICAL	GO:0071229	0.49178	1.69141	0.00204499	0.023765	0.49102	1.71739	0	0.0331672
GO_NUCLEAR_TRANSCRIPTION_FACTOR_COMPLEX	GO:0044798	0.395593	1.69044	0.0020284	0.0239137	0.3911	1.63769	0.00636943	0.0323316
GO_CELL_CELL_JUNCTION	GO:0005911	0.451377	1.69026	0.00205761	0.0238904	0.450566	1.62733	0.00869565	0.0333599
GO_PHOSPHOLIPID_TRANSPORTER_ACTIVITY	GO:0005548	0.536614	1.6902	0.00618557	0.0238622	0.521019	1.70642	0.00414938	0.0327844
GO_CHAPERONE_BINDING	GO:0051087	0.459096	1.6901	0.00413223	0.0238382	0.46086	1.6776	0.00851064	0.0314174
GO_MYELOID_LEUKOCYTE_DIFFERENTIATION	GO:0002573	0.534852	1.68974	0.00626305	0.0237891	0.531275	1.70739	0.00616016	0.0329092
GO_REGULATION_OF_PEPTIDE_SECRETION	GO:0002791	0.460529	1.68935	0.0020284	0.0238199	0.445507	1.63178	0.00660793	0.0326623
GO_INTERLEUKIN_1_SECRETION	GO:0050701	0.726252	1.68891	0.008	0.0238532	0.705144	1.64165	0.00618557	0.0321075
GO_NEGATIVE_REGULATION_OF_CELL_MOTILITY	GO:2000146	0.515173	1.68867	0.0040404	0.0238472	0.526325	1.69398	0.00430108	0.0315829
GO_POSITIVE_REGULATION_OF_CELLULAR_AMIDE_METABOLIC_PROCESS	GO:0034250	0.439657	1.68831	0.00212314	0.0238445	0.430718	1.66049	0.00430108	0.0319652
GO_REPRODUCTIVE_SYSTEM_DEVELOPMENT	GO:0061458	0.412179	1.68798	0	0.0239041	0.410062	1.66883	0	0.0320892
GO_DNA_BINDING_TRANSCRIPTION_FACTOR_BINDING	#N/A	0.403296	1.68719	0.00205761	0.0239719	0.402117	1.65427	0.00631579	0.0321737
GO_CELLULAR_RESPONSE_TO_EXTERNAL_STIMULUS	GO:0071496	0.462434	1.68611	0.00606061	0.0239705	0.446351	1.60687	0.00849257	0.0351249
GO_OUTER_MEMBRANE	GO:0019867	0.383057	1.6859	0.00619835	0.0239373	0.381149	1.67915	0.00409836	0.0313269
GO_RESPONSE_TO_ACID_CHEMICAL	GO:0001101	0.477892	1.68543	0.00403226	0.0239161	0.471457	1.65974	0.00430108	0.0318762
GO_RESPONSE_TO_RADIATION	GO:0009314	0.410499	1.68505	0	0.0239393	0.404086	1.64402	0.00636943	0.0321204
GO_REGULATION_OF_CELL_SIZE	GO:0008361	0.445686	1.6833	0.00210526	0.0241073	0.442621	1.69409	0.00420168	0.0316842
GO_POSITIVE_REGULATION_OF_CHEMOTAXIS	GO:0050921	0.6285	1.68266	0.00207039	0.0241223	0.628547	1.719	0.00408998	0.0333245
GO_REGULATION_OF_CHEMOTAXIS	GO:0050920	0.601442	1.6825	0.00207469	0.0241111	0.60857	1.74867	0.00203252	0.0424149
GO_POSITIVE_REGULATION_OF_DNA_BIOSYNTHETIC_PROCESS	GO:2000573	0.568893	1.68176	0.00823045	0.0242055	0.576804	1.70863	0.0040568	0.0331449
GO_ENZYME_ACTIVATOR_ACTIVITY	GO:0008047	0.421045	1.68079	0.0040568	0.0242489	0.421285	1.6581	0.0021322	0.032083
GO_POSITIVE_REGULATION_OF_CANONICAL_WNT_SIGNALING_PATHWAY	GO:0090263	0.451723	1.68036	0.00419287	0.0242309	0.454345	1.71738	0.00412371	0.0330657
GO_LEUKOCYTE_CHEMOTAXIS	GO:0030595	0.661691	1.67996	0.0020202	0.0241867	0.658659	1.68893	0.00421053	0.031211
GO_POSITIVE_REGULATION_OF_MAP_KINASE_ACTIVITY	GO:0043406	0.489052	1.67948	0.00409836	0.0242426	0.490625	1.6748	0.00845666	0.0316883
GO_EPITHELIAL_TO_MESENCHYMAL_TRANSITION	GO:0001837	0.518558	1.67929	0.00401606	0.0242522	0.530092	1.72271	0	0.0336677
GO_REGULATION_OF_VASCULATURE_DEVELOPMENT	GO:1901342	0.516863	1.67686	0.00406504	0.0246153	0.519903	1.67285	0.00431035	0.0318183
GO_CELL_CHEMOTAXIS	GO:0060326	0.631843	1.67669	0.00207039	0.0245291	0.631939	1.6986	0.00212314	0.0321541
GO_GOLGI_CISTERNA	GO:0031985	0.455223	1.67651	0.00821355	0.0245578	0.459918	1.70422	0.00636943	0.0323015
GO_POSITIVE_REGULATION_OF_LEUKOCYTE_MIGRATION	GO:0002687	0.685255	1.67645	0.00408163	0.0245471	0.679265	1.6612	0.00635593	0.0318241
GO_BASOLATERAL_PLASMA_MEMBRANE	GO:0016323	0.46828	1.67607	0.0060241	0.0245515	0.47173	1.66647	0.00214592	0.031802
GO_POSITIVE_REGULATION_OF_JNK_CASCADE	GO:0046330	0.507722	1.67547	0.004	0.024597	0.516869	1.70232	0.00206612	0.0320939
GO_TRANSFERASE_ACTIVITY_TRANSFERRING_GLYCOSYL_GROUPS	GO:0016757	0.401405	1.67531	0	0.0245905	0.387864	1.61389	0.00421941	0.0339584
GO_NEGATIVE_REGULATION_OF_TRANSPORT	GO:0051051	0.468667	1.67479	0.00411523	0.0246514	0.466778	1.63606	0.00883002	0.032675
GO_NEGATIVE_REGULATION_OF_EPITHELIAL_CELL_MIGRATION	GO:0010633	0.571123	1.67477	0.00403226	0.0246163	0.563906	1.66881	0	0.0320444
GO_NEGATIVE_REGULATION_OF_RESPONSE_TO_EXTERNAL_STIMULUS	GO:0032102	0.492056	1.67469	0	0.0245626	0.490089	1.65488	0.00440529	0.0320697
GO_EPIDERMAL_GROWTH_FACTOR_RECEPTOR_SIGNALING_PATHWAY	GO:0007173	0.489218	1.67425	0.00598802	0.0245671	0.508962	1.68276	0.00431965	0.0314889
GO_REGULATION_OF_RHO_PROTEIN_SIGNAL_TRANSDUCTION	GO:0035023	0.494626	1.67306	0.0083682	0.0246771	0.481953	1.63258	0.00819672	0.0327936
GO_GRANULOCYTE_MIGRATION	GO:0097530	0.70867	1.67288	0.00201613	0.0246551	0.706714	1.66819	0.00635593	0.032085
GO_TRANSFORMING_GROWTH_FACTOR_BETA_RECEPTOR_SIGNALING_PATHWAY	GO:0007179	0.518945	1.67196	0	0.0246308	0.512067	1.69206	0.00408998	0.0314516
GO_CHEMOKINE_PRODUCTION	GO:0032602	0.59042	1.6714	0.008	0.024659	0.582959	1.66862	0.00412371	0.032024
GO_CELL_AGING	GO:0007569	0.483903	1.67067	0.00406504	0.0246447	0.482172	1.66565	0.00408163	0.0316895
GO_REGULATION_OF_MYELOID_CELL_DIFFERENTIATION	GO:0045637	0.461255	1.66924	0.00200401	0.024784	0.448083	1.63913	0.00833333	0.0325542
GO_AMINOGLYCAN_METABOLIC_PROCESS	GO:0006022	0.516014	1.66904	0.00214133	0.0247229	0.52443	1.71905	0.00430108	0.0334228
GO_SPINDLE_MICROTUBULE	GO:0005876	0.734131	1.66876	0.00612245	0.0246422	0.733172	1.63824	0.00625	0.0324657
GO_APICAL_JUNCTION_COMPLEX	GO:0043296	0.491167	1.66838	0.00197239	0.0246631	0.500552	1.6679	0.00422833	0.0321234
GO_REGULATION_OF_RESPONSE_TO_WOUNDING	GO:1903034	0.567841	1.66816	0.0020202	0.0246729	0.57579	1.70252	0.00431965	0.0321334
GO_PLASMA_MEMBRANE_ORGANIZATION	GO:0007009	0.496277	1.66812	0.00201613	0.0246515	0.493118	1.64579	0.00873363	0.0319922
GO_RESPONSE_TO_TOXIC_SUBSTANCE	GO:0009636	0.42422	1.66804	0	0.024637	0.416225	1.65128	0.00612245	0.0319941
GO_CENTROMERE_COMPLEX_ASSEMBLY	GO:0034508	0.73499	1.66697	0.00197628	0.0246651	0.723735	1.59793	0.00404858	0.0365495
GO_MOLECULAR_ADAPTOR_ACTIVITY	GO:0060090	0.421595	1.66633	0.00199203	0.0246967	0.438799	1.73098	0.00209205	0.0359012
GO_LYMPHOCYTE_MIGRATION	GO:0072676	0.703104	1.6656	0	0.0248474	0.698754	1.688	0.0040568	0.0312518
GO_PEPTIDYL_TYROSINE_MODIFICATION	GO:0018212	0.469156	1.66558	0.00420168	0.0248139	0.467704	1.69373	0.00414079	0.0315407
GO_RESPONSE_TO_HEAT	GO:0009408	0.447468	1.66525	0.00813008	0.0247875	0.445944	1.65802	0.00421941	0.0319969
GO_NUCLEAR_CHROMATIN	GO:0000790	0.377975	1.66501	0.0040404	0.0248039	0.375246	1.6921	0	0.0315055
GO_CELL_ADHESION_MEDIATED_BY_INTEGRIN	GO:0033627	0.711788	1.66486	0.00207469	0.0248027	0.715239	1.69891	0.00208333	0.0324379
GO_POSITIVE_REGULATION_OF_CELL_SUBSTRATE_ADHESION	GO:0010811	0.562009	1.66467	0.00213675	0.0248118	0.575328	1.7089	0.00867679	0.0332424
GO_TISSUE_HOMEOSTASIS	GO:0001894	0.486051	1.66453	0	0.0248078	0.477851	1.6628	0.00422833	0.031701
GO_POSITIVE_REGULATION_OF_CELL_PROJECTION_ORGANIZATION	GO:0031346	0.429041	1.66443	0.00201613	0.0247521	0.434601	1.70406	0	0.0322027
GO_INTERLEUKIN_1_PRODUCTION	GO:0032612	0.651971	1.66417	0.00606061	0.0247913	0.648616	1.64262	0	0.0322427
GO_POSITIVE_REGULATION_OF_FIBROBLAST_PROLIFERATION	GO:0048146	0.700137	1.66334	0.00203252	0.0248971	0.692899	1.6335	0.00421053	0.0327607
GO_ATPASE_ACTIVITY_COUPLED_TO_MOVEMENT_OF_SUBSTANCES	GO:0043492	0.428688	1.66239	0.00814664	0.0250415	0.424	1.62237	0.00431965	0.0335592
GO_REGULATION_OF_LYMPHOCYTE_MIGRATION	GO:2000401	0.728997	1.66197	0	0.0250241	0.735961	1.69225	0	0.0315409
GO_PROTEIN_TYROSINE_KINASE_ACTIVITY	GO:0004713	0.481961	1.66147	0.00831601	0.0250876	0.486103	1.67259	0.00204918	0.0317845
GO_POSITIVE_REGULATION_OF_LEUKOCYTE_CHEMOTAXIS	GO:0002690	0.684215	1.66072	0.00404858	0.0251411	0.675752	1.62135	0.00423729	0.0336227
GO_PEPTIDYL_THREONINE_MODIFICATION	GO:0018210	0.458438	1.66054	0.00198413	0.0251453	0.456553	1.6565	0	0.0319406
GO_POSITIVE_REGULATION_OF_ERK1_AND_ERK2_CASCADE	GO:0070374	0.577001	1.65916	0.00619835	0.0252076	0.567495	1.67782	0.00627615	0.0314071
GO_REGULATION_OF_BODY_FLUID_LEVELS	GO:0050878	0.442446	1.659	0.00623701	0.0251959	0.450956	1.69034	0.00656455	0.0316768
GO_PEPTIDYL_TYROSINE_DEPHOSPHORYLATION	GO:0035335	0.481775	1.65885	0.00200401	0.0251667	0.487901	1.67575	0.00632911	0.0315279
GO_RESPONSE_TO_ALCOHOL	GO:0097305	0.448494	1.65853	0.00203666	0.0251768	0.433777	1.59745	0.00626305	0.0365853
GO_MYELOID_LEUKOCYTE_MIGRATION	GO:0097529	0.653628	1.65805	0	0.0250857	0.650382	1.6661	0.00845666	0.031833
GO_NEUTROPHIL_MIGRATION	GO:1990266	0.723031	1.65749	0.0020202	0.0251625	0.727234	1.65809	0.00642398	0.0320312
GO_RESPONSE_TO_MECHANICAL_STIMULUS	GO:0009612	0.503946	1.65598	0.00210084	0.0254267	0.497769	1.61556	0.00646552	0.0339649
GO_INTERLEUKIN_1_BETA_PRODUCTION	GO:0032611	0.678092	1.65525	0.00414079	0.0254865	0.680402	1.67042	0	0.0320508
GO_REGULATION_OF_CELL_SUBSTRATE_ADHESION	GO:0010810	0.532735	1.65513	0.00621118	0.0254496	0.54782	1.68081	0.00421941	0.0312896
GO_POSITIVE_CHEMOTAXIS	GO:0050918	0.554127	1.65512	0.00816326	0.0254163	0.554482	1.66755	0.00419287	0.032139
GO_ORGANOPHOSPHATE_METABOLIC_PROCESS	GO:0019637	0.426133	1.65455	0.00607288	0.0254893	0.421427	1.63248	0.00630252	0.0327667
GO_MAINTENANCE_OF_LOCATION	GO:0051235	0.484458	1.65427	0.00412371	0.0254522	0.484241	1.62411	0.00431965	0.0334102
GO_ERBB_SIGNALING_PATHWAY	GO:0038127	0.448735	1.65378	0.00809717	0.0254747	0.466952	1.66432	0	0.0317878
GO_COATED_VESICLE	GO:0030135	0.404146	1.653	0.00197239	0.02553	0.407089	1.68598	0.00214133	0.031533
GO_MAGNESIUM_ION_BINDING	GO:0000287	0.410516	1.65043	0.00622407	0.0259807	0.407706	1.65262	0.00209644	0.0320432
GO_POSITIVE_REGULATION_OF_PROTEIN_LOCALIZATION_TO_CELL_PERIPHERY	GO:1904377	0.527765	1.65043	0.00394477	0.0259481	0.51952	1.63762	0.00208333	0.0322992
GO_CARBOHYDRATE_BINDING	GO:0030246	0.492034	1.64811	0.00639659	0.0261407	0.469689	1.6082	0.00845666	0.0348608
GO_PROTEIN_TYROSINE_PHOSPHATASE_ACTIVITY	GO:0004725	0.485771	1.64769	0.00200401	0.0262213	0.492782	1.67115	0.00631579	0.0320838
GO_PHOSPHOLIPID_BINDING	GO:0005543	0.411347	1.64633	0.00819672	0.0264415	0.403109	1.64036	0.00623701	0.0322937
GO_REGULATION_OF_COAGULATION	GO:0050818	0.6333	1.64605	0.0040568	0.0264188	0.650266	1.70224	0.004329	0.0320328
GO_CYTOPLASMIC_SIDE_OF_MEMBRANE	GO:0098562	0.443248	1.64596	0.0063425	0.0263752	0.440539	1.64572	0.00862069	0.0319141
GO_HETEROTYPIC_CELL_CELL_ADHESION	GO:0034113	0.580083	1.64562	0.00589391	0.0263558	0.571002	1.62895	0.00628931	0.0331395
GO_REGULATION_OF_VESICLE_MEDIATED_TRANSPORT	GO:0060627	0.412157	1.64542	0.00414079	0.0262907	0.405335	1.64412	0.00845666	0.0321455
GO_PROTEIN_KINASE_B_SIGNALING	GO:0043491	0.498457	1.64494	0.00816326	0.0262693	0.491662	1.63735	0.00626305	0.0323188
GO_REGULATION_OF_WOUND_HEALING	GO:0061041	0.58241	1.64481	0.00410678	0.0262773	0.597123	1.69738	0.0043384	0.0319687
GO_POSITIVE_REGULATION_OF_EPITHELIAL_CELL_PROLIFERATION	GO:0050679	0.439513	1.64266	0.00206186	0.0265661	0.443097	1.67998	0.00421053	0.0313927
GO_TISSUE_REMODELING	GO:0048771	0.510646	1.64226	0.00412371	0.0266472	0.502302	1.63815	0.00619835	0.032437
GO_REGULATION_OF_MACROPHAGE_ACTIVATION	GO:0043030	0.62086	1.6421	0.00204918	0.0265517	0.601329	1.58943	0.00835073	0.0374691
GO_NEGATIVE_REGULATION_OF_CELL_PROJECTION_ORGANIZATION	GO:0031345	0.477581	1.63957	0.00808081	0.0269254	0.491289	1.68701	0.0021645	0.0314182
GO_NUCLEAR_ENVELOPE	GO:0005635	0.373862	1.63882	0.00198807	0.0270747	0.368103	1.58892	0.00632911	0.0373206
GO_SMOOTH_MUSCLE_CELL_PROLIFERATION	GO:0048659	0.538113	1.6385	0.00996016	0.0270709	0.546047	1.66662	0.00209644	0.0318087
GO_RESPONSE_TO_FATTY_ACID	GO:0070542	0.563327	1.63827	0.00843882	0.0270843	0.552325	1.63548	0.00843882	0.0326875
GO_PROTEIN_CONTAINING_COMPLEX_LOCALIZATION	GO:0031503	0.357535	1.63704	0.00211416	0.0272887	0.367616	1.68269	0.00625	0.0314374
GO_TRANSCRIPTION_COREPRESSOR_ACTIVITY	GO:0003714	0.389644	1.63612	0.00199601	0.0273973	0.384374	1.59348	0	0.0368014
GO_SCAFFOLD_PROTEIN_BINDING	GO:0097110	0.485088	1.63582	0.004158	0.0273862	0.468421	1.58702	0.00842105	0.0377601
GO_REGULATION_OF_CELL_DIVISION	GO:0051302	0.482325	1.63254	0.0020202	0.0280164	0.482817	1.61649	0.00828157	0.0337915
GO_NEGATIVE_REGULATION_OF_HYDROLASE_ACTIVITY	GO:0051346	0.431015	1.63195	0.00398406	0.0281205	0.431636	1.61411	0.00650759	0.0339612
GO_RESPONSE_TO_KETONE	GO:1901654	0.460529	1.62959	0.00406504	0.0285838	0.469966	1.64636	0.00211416	0.0320916
GO_REGULATION_OF_LEUKOCYTE_CHEMOTAXIS	GO:0002688	0.663154	1.62952	0.00616016	0.0285723	0.664162	1.63389	0.00635593	0.0327823
GO_RESPONSE_TO_ORGANOPHOSPHORUS	GO:0046683	0.478161	1.62876	0.0040404	0.0287475	0.482076	1.64609	0	0.0320975
GO_REGULATION_OF_ANTIGEN_RECEPTOR_MEDIATED_SIGNALING_PATHWAY	GO:0050854	0.737202	1.62835	0.00616016	0.0287659	0.730747	1.64595	0.00627615	0.0320349
GO_GLYCOSAMINOGLYCAN_BINDING	GO:0005539	0.54211	1.62617	0.0020202	0.028987	0.543986	1.65377	0.00623701	0.0321661
GO_POSITIVE_REGULATION_OF_PLASMA_MEMBRANE_BOUNDED_CELL_PROJECTION_ASSEMBLY	GO:0120034	0.52428	1.62422	0.00612245	0.0293104	0.529596	1.65801	0.00608519	0.0319474
GO_T_CELL_MIGRATION	GO:0072678	0.765266	1.62414	0	0.0292625	0.75024	1.62489	0.00206186	0.0335625
GO_CLATHRIN_COATED_VESICLE	GO:0030136	0.435527	1.62265	0.00395257	0.0293101	0.448636	1.68461	0.00849257	0.0314178
GO_MUSCLE_CELL_PROLIFERATION	GO:0033002	0.480506	1.62059	0.00974659	0.0298291	0.489756	1.6243	0.00638298	0.0335317
GO_RESPONSE_TO_TEMPERATURE_STIMULUS	GO:0009266	0.43088	1.6197	0.00412371	0.0299687	0.422573	1.59886	0.00842105	0.0364708
GO_POSITIVE_REGULATION_OF_VASCULATURE_DEVELOPMENT	GO:1904018	0.506624	1.61842	0.00813008	0.0301692	0.518481	1.65158	0.00424628	0.0320998
GO_SYNCYTIUM_FORMATION	GO:0006949	0.577305	1.61827	0.00204082	0.0301842	0.565613	1.57525	0.00860215	0.0397449
GO_POSITIVE_REGULATION_OF_RESPONSE_TO_WOUNDING	GO:1903036	0.580374	1.61803	0.00808081	0.0301867	0.585303	1.67959	0.00860215	0.0313146
GO_CALCIUM_MEDIATED_SIGNALING	GO:0019722	0.54277	1.61651	0.00795229	0.0304546	0.549925	1.60914	0.00858369	0.0346844
GO_TRANSCRIPTION_COACTIVATOR_ACTIVITY	GO:0003713	0.363019	1.61402	0.00391389	0.0309318	0.370123	1.64658	0.00205761	0.0320932
GO_CELL_MATURATION	GO:0048469	0.443192	1.61304	0.00591716	0.0310878	0.445539	1.60975	0.00200803	0.0345853
GO_REGULATION_OF_INTRACELLULAR_TRANSPORT	GO:0032386	0.357949	1.61086	0.00413223	0.0312873	0.357876	1.60684	0.00662252	0.0350913
GO_REGULATION_OF_STEM_CELL_PROLIFERATION	GO:0072091	0.504464	1.60616	0.00619835	0.0317946	0.505444	1.59977	0.00417537	0.0363357
GO_PROTEIN_HETERODIMERIZATION_ACTIVITY	GO:0046982	0.38474	1.60593	0	0.0318275	0.383829	1.61547	0.00821355	0.0339488
GO_NEGATIVE_REGULATION_OF_NEURON_PROJECTION_DEVELOPMENT	GO:0010977	0.45873	1.59891	0.00809717	0.033337	0.475514	1.6671	0.00656455	0.0321484
GO_REGULATION_OF_REPRODUCTIVE_PROCESS	GO:2000241	0.440255	1.59781	0	0.0333423	0.431375	1.54931	0.00642398	0.0447211
GO_CELLULAR_RESPONSE_TO_PEPTIDE	GO:1901653	0.372185	1.59613	0.00816326	0.0335191	0.367964	1.5773	0.00858369	0.0393975
GO_PHOSPHORIC_ESTER_HYDROLASE_ACTIVITY	GO:0042578	0.410642	1.5951	0	0.0337362	0.416233	1.6084	0.00426439	0.0348142
GO_REGULATION_OF_CELLULAR_RESPONSE_TO_TRANSFORMING_GROWTH_FACTOR_BETA_STIMULUS	GO:1903844	0.502838	1.59471	0.00863931	0.033825	0.505267	1.62352	0.00845666	0.0334625
GO_CYSTEINE_TYPE_ENDOPEPTIDASE_ACTIVITY	GO:0004197	0.429048	1.59071	0.00598802	0.0344471	0.41834	1.55825	0.00823045	0.0431988
GO_UROGENITAL_SYSTEM_DEVELOPMENT	GO:0001655	0.452286	1.58577	0.00788955	0.0352667	0.466914	1.64043	0.00808081	0.0323721
GO_REGULATION_OF_NEURON_PROJECTION_DEVELOPMENT	GO:0010975	0.376054	1.58516	0.00806452	0.0353594	0.393021	1.65886	0	0.0320514
GO_RESPONSE_TO_PEPTIDE	GO:1901652	0.366893	1.58427	0.00826446	0.0355521	0.364061	1.57746	0.00426439	0.0393801
GO_RESPONSE_TO_ESTRADIOL	GO:0032355	0.429936	1.58386	0.00401606	0.0356201	0.432289	1.5676	0.00434783	0.0411551
GO_DEVELOPMENTAL_MATURATION	GO:0021700	0.402087	1.58313	0.00206186	0.0358264	0.40942	1.60709	0.00204082	0.0351041
GO_PHOSPHATASE_ACTIVITY	GO:0016791	0.414469	1.58257	0	0.035926	0.41852	1.57003	0.00430108	0.0405612
GO_G_PROTEIN_COUPLED_RECEPTOR_BINDING	GO:0001664	0.48791	1.58156	0.00816326	0.0360623	0.494937	1.6116	0.00632911	0.0343816
GO_DNA_TEMPLATED_TRANSCRIPTION_INITIATION	GO:0006352	0.353675	1.57461	0.00603622	0.0376067	0.355495	1.58402	0.00831601	0.0382642
GO_GLYCOSYLATION	GO:0070085	0.36245	1.57373	0.00416667	0.0377609	0.363454	1.56752	0.00421053	0.0411388
GO_DENDRITE_DEVELOPMENT	GO:0016358	0.356085	1.56298	0.006	0.0400412	0.376834	1.63314	0.00440529	0.0328369
GO_ANATOMICAL_STRUCTURE_MATURATION	GO:0071695	0.431521	1.56284	0.0020284	0.0400345	0.437041	1.58478	0.006	0.0382677
GO_NEGATIVE_REGULATION_OF_CELL_DEVELOPMENT	GO:0010721	0.407713	1.54895	0.00819672	0.043322	0.418323	1.6032	0.00217391	0.0357041
GO_TRANSCRIPTION_FACTOR_COMPLEX	GO:0005667	0.323527	1.54531	0	0.0442139	0.322091	1.48909	0.00875273	0.059692
GO_PALLIUM_DEVELOPMENT	GO:0021543	0.395508	1.54286	0.00808081	0.0447967	0.399463	1.54268	0.0063425	0.0456377
GO_DEVELOPMENT_OF_PRIMARY_SEXUAL_CHARACTERISTICS	GO:0045137	0.379686	1.53751	0.00392927	0.0462538	0.375429	1.50152	0.00641026	0.0556822
GO_TELENCEPHALON_DEVELOPMENT	GO:0021537	0.369204	1.51507	0.00400802	0.052208	0.369236	1.5127	0.00623701	0.0526411
GO_MULTICELLULAR_ORGANISMAL_HOMEOSTASIS	GO:0048871	0.388596	1.50926	0.00420168	0.0539835	0.398948	1.53423	0.00223214	0.0472007
GO_GLAND_DEVELOPMENT	GO:0048732	0.355382	1.5078	0.00811359	0.0544715	0.368098	1.55037	0.00643777	0.0446524
GO_RESPONSE_TO_PEPTIDE_HORMONE	GO:0043434	0.326716	1.47922	0.00819672	0.0637915	0.324914	1.48864	0.00422833	0.0597893
