# Supplementary material for: Transcriptomic Analysis of Hepatitis B Infected Liver for Prediction of Hepatocellular Carcinoma
Source: Biology (Basel). 2023 Jan 26;12(2):188. doi: 10.3390/biology12020188 (PMC9952979; doi:10.3390/biology12020188)
Supplement: Supplementary file 1 [file biology-12-00188-s001.zip › Supp. Table S7.xlsx]

## Sheet: Sheet1
Supplementary Table S7: PCM1 gene list (genes, probesets)
176 gen		195 probeset
C9orf152		229964_AT / C9ORF152
ENPP5		227803_AT / ENPP5
TMPRSS3		220177_S_AT / TMPRSS3
CTHRC1		223949_AT / TMPRSS3
TMEM200A		225681_AT / CTHRC1
COL1A1		234994_AT / TMEM200A
LOXL1		202311_S_AT / COL1A1
FNDC1		203570_AT / LOXL1
STMN2		226930_AT / FNDC1
SEMA3C		203000_AT / STMN2
SMOC2		203001_S_AT / STMN2
CDH11		203789_S_AT / SEMA3C
EFEMP1		223235_S_AT / SMOC2
NPNT		207173_X_AT / CDH11
CCDC80		201843_S_AT / EFEMP1
SPP1		201842_S_AT / EFEMP1
SOX9		225911_AT / NPNT
CD24		225242_S_AT / CCDC80
CLIC6		209875_S_AT / SPP1
DCDC2		202935_S_AT / SOX9
CFTR		208650_S_AT / CD24
KRT7		227742_AT / CLIC6
EPCAM		222925_AT / DCDC2
TACSTD2		205043_AT / CFTR
CXCL6		209016_S_AT / KRT7
BICC1		201839_S_AT / EPCAM
ELOVL7		202286_S_AT / TACSTD2
ITGB8		206336_AT / CXCL6
KCNJ16		213429_AT / BICC1
ALKAL2		266_S_AT / CD24
NALCN		227180_AT / ELOVL7
CLDN11		226189_AT / ITGB8
DKK3		219564_AT / KCNJ16
EPHA3		238018_AT / ALKAL2
KRT19		228608_AT / NALCN
ANXA3		228335_AT / CLDN11
APCDD1		202196_S_AT / DKK3
RAB25		206070_S_AT / EPHA3
FAM3B		201650_AT / KRT19
ESRP1		209369_AT / ANXA3
PDZK1IP1		225016_AT / APCDD1
CXCL5		221127_S_AT / DKK3
GABRP		218186_AT / RAB25
NTM		227194_AT / FAM3B
COL10A1		225846_AT / ESRP1
GLRB		1553589_A_AT / PDZK1IP1
ZPLD1		219630_AT / PDZK1IP1
AKR1B10		214974_X_AT / CXCL5
NQO1		205044_AT / GABRP
SULT1C2		227566_AT / NTM
DLK1		217428_S_AT / COL10A1
COL15A1		205280_AT / GLRB
FABP4		1561969_AT / ZPLD1
EDIL3		206561_S_AT / AKR1B10
MAMDC2		210519_S_AT / NQO1
NTRK2		205342_S_AT / SULT1C2
OGN		211470_S_AT / SULT1C2
MEOX2		209560_S_AT / DLK1
PRKAA2		203477_AT / COL15A1
AQP4		203980_AT / FABP4
DTNA		225275_AT / EDIL3
NEXN		228885_AT / MAMDC2
C12orf75		221796_AT / NTRK2
EGR1		222722_AT / OGN
ARG2		206201_S_AT / MEOX2
NTS		238441_AT / PRKAA2
ID4		226228_AT / AQP4
WISP1		205741_S_AT / DTNA
CHST9		226103_AT / NEXN
CCL20		225105_AT / C12ORF75
CXCL8		227404_S_AT / EGR1
KRT23		203946_S_AT / ARG2
LRRC1		206291_AT / NTS
RASEF		209292_AT / ID4
B3GNT5		209291_AT / ID4
SLC28A3		229802_AT / WISP1
BICD1		224400_S_AT / CHST9
VASH2		223737_X_AT / CHST9
DNAJC6		205476_AT / CCL20
VGLL3		202859_X_AT / CXCL8
ANKRD36BP2		218963_S_AT / KRT23
IGKC		218816_AT / LRRC1
FCRL5		227084_AT / DTNA
TNFRSF17		235144_AT / RASEF
POU2AF1		225612_S_AT / B3GNT5
RGCC		232277_AT / SLC28A3
CD1E		231964_AT / BICD1
MS4A1		235343_AT / VASH2
CXCR4		204720_S_AT / DNAJC6
CCL19		227399_AT / VGLL3
ITGBL1		1569040_S_AT / ANKRD36BP2
KIAA1211		237625_S_AT / IGKC
CLMP		231647_S_AT / FCRL5
SPON1		206641_AT / TNFRSF17
ACSL4		205267_AT / POU2AF1
GPC3		218723_S_AT / RGCC
HKDC1		215784_AT / CD1E
KLHL29		228592_AT / MS4A1
PHLDA2		217028_AT / CXCR4
MAFF		210072_AT / CCL19
PHLDA1		205422_S_AT / ITGBL1
GDF15		231993_AT / ITGBL1
SOCS3		227231_AT / KIAA1211
SLC51B		226834_AT / CLMP
FAM169A		213994_S_AT / SPON1
NPW		202422_S_AT / ACSL4
TMEM255A		1557418_AT / ACSL4
C11orf80		209220_AT / GPC3
MPP7		227614_AT / HKDC1
SLC12A1		229310_AT / KLHL29
ADAMDEC1		209803_S_AT / PHLDA2
CCL18		36711_AT / MAFF
APOBEC3B		217997_AT / PHLDA1
GPNMB		221577_X_AT / GDF15
GAS2L3		227697_AT / SOCS3
BCAT1		230830_AT / SLC51B
THEMIS		213954_AT / FAM169A
C16orf54		243110_X_AT / NPW
CRTAM		219895_AT / TMEM255A
TOX		238593_AT / C11ORF80
CD69		238778_AT / MPP7
PTPN22		220281_AT / SLC12A1
CTLA4		206134_AT / ADAMDEC1
KL		32128_AT / CCL18
GABBR2		206632_S_AT / APOBEC3B
UPP2		1554018_AT / GPNMB
GPR82		238756_AT / GAS2L3
ZNF818P		225285_AT / BCAT1
CXCL13		226517_AT / BCAT1
CXCL11		1558972_S_AT / THEMIS
ANKRD22		1559584_A_AT / C16ORF54
C15orf48		206914_AT / CRTAM
FCGR1B		204529_S_AT / TOX
ETV7		209795_AT / CD69
UTS2		236539_AT / PTPN22
DEPDC1B		236341_AT / CTLA4
CDC6		205978_AT / KL
HELLS		209990_S_AT / GABBR2
CENPK		231376_AT / UPP2
ECT2		244434_AT / GPR82
MAD2L1		238149_AT / ZNF818P
CENPU		205242_AT / CXCL13
DTL		211122_S_AT / CXCL11
MND1		210163_AT / CXCL11
E2F8		238439_AT / ANKRD22
MCM10		223484_AT / C15ORF48
ANLN		214511_X_AT / FCGR1B
TOP2A		224225_S_AT / ETV7
KIF20A		220785_AT / UTS2
PBK		220784_S_AT / UTS2
CDKN3		226980_AT / DEPDC1B
CCNB1		203967_AT / CDC6
PRC1		227350_AT / HELLS
RRM2		222848_AT / CENPK
ASPM		219787_S_AT / ECT2
NDC80		203362_S_AT / MAD2L1
TTK		218883_S_AT / CENPU
KIF11		218585_S_AT / DTL
NUF2		229305_AT / CENPU
DLGAP5		223700_AT / MND1
CCNB2		219990_AT / E2F8
CCNA2		220651_S_AT / MCM10
SPC25		222608_S_AT / ANLN
NEK2		201292_AT / TOP2A
KIF14		218755_AT / KIF20A
NCAPG		219148_AT / PBK
BUB1		1555758_A_AT / CDKN3
FAM111B		214710_S_AT / CCNB1
DEPDC1		218009_S_AT / PRC1
UHRF1		201890_AT / RRM2
E2F7		209773_S_AT / RRM2
PEG10		219918_S_AT / ASPM
LYZ		204162_AT / NDC80
IGHM		204822_AT / TTK
MZB1		228729_AT / CCNB1
TRIM31		204444_AT / KIF11
		223381_AT / NUF2
		203764_AT / DLGAP5
		202705_AT / CCNB2
		203418_AT / CCNA2
		209891_AT / SPC25
		204641_AT / NEK2
		236641_AT / KIF14
		201291_S_AT / TOP2A
		218663_AT / NCAPG
		209642_AT / BUB1
		1557129_A_AT / FAM111B
		232278_S_AT / DEPDC1
		225655_AT / UHRF1
		228033_AT / E2F7
		212094_AT / PEG10
		1555745_A_AT / LYZ
		216491_X_AT / IGHM
		223565_AT / MZB1
		208170_S_AT / TRIM31
