# Supplementary material for: Transcriptomic Analysis of Hepatitis B Infected Liver for Prediction of Hepatocellular Carcinoma
Source: Biology (Basel). 2023 Jan 26;12(2):188. doi: 10.3390/biology12020188 (PMC9952979; doi:10.3390/biology12020188)
Supplement: Supplementary file 1 [file biology-12-00188-s001.zip › Supp. Table S8.xlsx]

## Sheet: GSE14520
Supplementary Table S8: Differentially expressed genes between HCC tumors and normal liver
ProbeSet	Symbol	Adjusted-p	Log fold change
219918_s_at	ASPM	4.40605e-78	3.04263
201890_at	RRM2	9.71906e-78	3.07348
201693_s_at	EGR1	3.49816e-76	-2.77462
218009_s_at	PRC1	3.49816e-76	2.40657
209773_s_at	RRM2	2.71088e-74	2.85432
214710_s_at	CCNB1	3.33179e-73	2.45345
201291_s_at	TOP2A	4.87205e-73	2.97128
201292_at	TOP2A	5.26947e-71	2.65275
209220_at	GPC3	8.66277e-69	4.89352
209714_s_at	CDKN3	1.01803e-67	2.3541
218585_s_at	DTL	1.27896e-66	2.25985
201694_s_at	EGR1	1.28119e-66	-2.92077
202422_s_at	ACSL4	1.37167e-63	3.28792
219787_s_at	ECT2	3.07663e-61	1.98818
204641_at	NEK2	3.52697e-58	1.70856
218755_at	KIF20A	5.86972e-57	1.59107
218883_s_at	CENPU	1.02349e-56	1.92256
218662_s_at	NCAPG	3.84599e-56	1.83598
205476_at	CCL20	1.4046e-54	3.15929
204822_at	TTK	1.08301e-52	1.59483
219148_at	PBK	1.89675e-50	1.49846
202705_at	CCNB2	1.2437e-49	1.34833
204162_at	NDC80	2.70262e-48	1.23332
203362_s_at	MAD2L1	4.11705e-48	1.42778
206561_s_at	AKR1B10	1.79618e-47	3.76921
213226_at	CCNA2	1.27984e-46	1.2357
218663_at	NCAPG	1.26189e-45	1.10739
203764_at	DLGAP5	2.35034e-44	1.23351
212094_at	PEG10	2.94622e-44	3.7857
206364_at	KIF14	8.28077e-44	0.917614
218816_at	LRRC1	4.09147e-43	1.46825
211470_s_at	SULT1C2	4.18764e-43	2.34401
205342_s_at	SULT1C2	6.31908e-40	2.21123
203477_at	COL15A1	2.80206e-39	1.69357
209642_at	BUB1	3.1444e-38	0.913559
203967_at	CDC6	6.78061e-38	0.892316
220085_at	HELLS	6.86945e-37	0.978991
217998_at	PHLDA1	2.51517e-36	-0.856946
212092_at	PEG10	8.56819e-36	2.25836
209891_at	SPC25	1.78372e-35	0.634451
203968_s_at	CDC6	4.91441e-35	0.729869
204444_at	KIF11	6.68695e-35	0.865971
209374_s_at	IGHM	2.71684e-34	-1.86009
208650_s_at	CD24	4.9811e-34	2.42068
203418_at	CCNA2	3.69094e-33	0.861269
204720_s_at	DNAJC6	6.1676e-33	1.08722
219990_at	E2F8	2.4377e-32	0.620595
210072_at	CCL19	2.86824e-31	-1.80139
205343_at	SULT1C2	7.0656e-31	1.2838
209772_s_at	CD24	3.69146e-29	1.32628
221795_at	NTRK2	1.22911e-28	-0.305478
209803_s_at	PHLDA2	2.55706e-26	1.40251
214669_x_at	IGKC	6.11155e-26	-1.54026
209875_s_at	SPP1	6.97983e-26	2.09571
219564_at	KCNJ16	4.96003e-25	-0.754739
210519_s_at	NQO1	6.6131e-25	2.17797
201468_s_at	NQO1	5.58542e-24	1.98561
209293_x_at	ID4	1.5819e-23	-0.428661
217999_s_at	PHLDA1	1.77678e-23	-0.846741
218000_s_at	PHLDA1	4.73459e-23	-0.636285
213975_s_at	LYZ	6.54529e-23	1.36563
266_s_at	CD24	1.51595e-22	1.68927
205043_at	CFTR	2.82412e-22	-0.969239
206632_s_at	APOBEC3B	7.78265e-22	0.711584
209291_at	ID4	1.6714e-21	-1.07526
212827_at	IGHM	7.82458e-21	-0.53345
208651_x_at	CD24	9.03126e-21	1.4538
220295_x_at	DEPDC1	1.13839e-20	0.412868
217996_at	PHLDA1	1.7709e-20	-1.46908
205044_at	GABRP	1.86221e-19	-0.722005
209436_at	SPON1	2.52159e-19	-0.430214
205741_s_at	DTNA	9.70357e-19	0.511194
209771_x_at	CD24	1.77051e-18	1.53585
216379_x_at	CD24	1.8919e-18	1.57453
206070_s_at	EPHA3	4.89999e-17	-0.780486
202936_s_at	SOX9	1.35722e-16	1.03002
217997_at	PHLDA1	1.51891e-16	-1.04523
218723_s_at	RGCC	4.17363e-16	0.883818
202286_s_at	TACSTD2	6.7795e-16	-1.11535
209795_at	CD69	1.93524e-15	-0.555309
201467_s_at	NQO1	2.39398e-15	0.792232
201141_at	GPNMB	3.40591e-15	0.900753
220651_s_at	MCM10	1.37886e-14	0.279408
215444_s_at	TRIM31	2.37661e-14	0.448889
220585_at	HKDC1	3.52051e-14	0.30957
211080_s_at	NEK2	6.33331e-14	0.213591
209560_s_at	DLK1	1.42227e-13	1.85918
209292_at	ID4	1.82202e-13	-0.518081
217026_at	CFTR	2.01637e-13	-0.120979
221286_s_at	MZB1	6.83359e-13	-0.351566
203946_s_at	ARG2	1.73175e-12	0.656132
214768_x_at	IGKC	2.70815e-12	-0.69471
202935_s_at	SOX9	3.48219e-12	0.916664
206360_s_at	SOCS3	3.80055e-12	-0.140166
219630_at	PDZK1IP1	5.74039e-12	1.09213
202312_s_at	COL1A1	1.85577e-11	-0.128541
214806_at	BICD1	2.28931e-10	0.235653
207790_at	LRRC1	2.36771e-10	0.200528
214777_at	IGKC	2.5904e-10	-0.603475
213994_s_at	SPON1	3.07933e-10	-0.307509
221796_at	NTRK2	3.23731e-10	-0.2218
218963_s_at	KRT23	7.06998e-10	1.00366
214974_x_at	CXCL5	7.4933e-10	0.628315
206071_s_at	EPHA3	1.50878e-09	-0.1272
206359_at	SOCS3	2.58276e-09	-0.249401
215784_at	CD1E	3.15494e-09	-0.12384
210163_at	CXCL11	3.18156e-09	0.556447
215702_s_at	CFTR	3.18156e-09	-0.143702
209990_s_at	GABBR2	3.5227e-09	0.530483
206060_s_at	PTPN22	4.64819e-09	-0.188798
211835_at	IGKC	5.99478e-09	-0.110001
208592_s_at	CD1E	7.87233e-09	-0.152281
206134_at	ADAMDEC1	1.15726e-08	0.342957
213429_at	BICC1	1.32585e-08	0.761543
211122_s_at	CXCL11	4.40083e-08	0.389263
209369_at	ANXA3	4.84028e-08	-0.350821
214345_at	EDIL3	1.36104e-07	-0.149769
207379_at	EDIL3	1.39089e-07	-0.174515
222020_s_at	NTM	1.43497e-07	-0.149361
209924_at	CCL18	1.47274e-07	0.366822
213993_at	SPON1	2.60977e-07	-0.14215
206914_at	CRTAM	2.8539e-07	-0.102374
211312_s_at	WISP1	3.59543e-07	-0.105341
216491_x_at	IGHM	4.79364e-07	-0.410804
214680_at	NTRK2	6.61459e-07	-0.122554
221680_s_at	ETV7	9.69029e-07	-0.145416
36711_at	MAFF	1.29764e-06	0.63481
215703_at	CFTR	1.67182e-06	-0.0731103
208010_s_at	PTPN22	3.90289e-06	-0.0663355
210611_s_at	DTNA	4.43687e-06	0.178501
204922_at	C11orf80	6.08878e-06	0.139642
202311_s_at	COL1A1	6.46436e-06	0.424324
211146_at	IGKC	6.62944e-06	-0.102101
203788_s_at	SEMA3C	7.19798e-06	-0.12553
220281_at	SLC12A1	7.93268e-06	0.348874
210906_x_at	AQP4	2.00657e-05	-0.0771027
220177_s_at	TMPRSS3	2.30515e-05	0.397069
203980_at	FABP4	2.31309e-05	0.441283
210159_s_at	TRIM31	4.34408e-05	0.138086
202859_x_at	CXCL8	6.19111e-05	0.580778
211488_s_at	ITGB8	6.41435e-05	-0.105877
207709_at	PRKAA2	8.18473e-05	0.109655
219895_at	TMEM255A	0.000106984	0.142751
214927_at	ITGBL1	0.000114815	-0.358605
217418_x_at	MS4A1	0.000146687	-0.128718
201839_s_at	EPCAM	0.000149613	0.895878
207173_x_at	CDH11	0.000162106	0.39216
220475_at	SLC28A3	0.000180766	-0.0757294
32128_at	CCL18	0.000190474	0.198594
215508_at	BUB1	0.000201648	0.0637183
209802_at	PHLDA2	0.000219777	-0.0887815
211493_x_at	DTNA	0.000225941	0.0744689
202287_s_at	TACSTD2	0.00024499	-0.0687315
204529_s_at	TOX	0.000259427	0.216675
219121_s_at	ESRP1	0.000301113	0.288584
211919_s_at	CXCR4	0.000460657	-0.269337
210091_s_at	DTNA	0.000584105	0.169467
208011_at	PTPN22	0.000598352	-0.0837594
204721_s_at	DNAJC6	0.000598352	-0.0673985
210067_at	AQP4	0.000621769	-0.0640261
205242_at	CXCL13	0.000851444	0.341311
215509_s_at	BUB1	0.000880809	0.089528
209201_x_at	CXCR4	0.00116965	-0.268497
210356_x_at	MS4A1	0.00120069	-0.10727
206291_at	NTS	0.00164218	0.552573
217077_s_at	GABBR2	0.00176873	-0.160734
219740_at	VASH2	0.00188499	0.0947724
221577_x_at	GDF15	0.00196767	0.424705
208170_s_at	TRIM31	0.0020502	0.102721
213954_at	FAM169A	0.00272622	0.15968
203570_at	LOXL1	0.00278175	-0.168248
217430_x_at	COL1A1	0.00297168	-0.197483
206908_s_at	CLDN11	0.00300519	-0.067368
205280_at	GLRB	0.00300519	0.114135
216275_at	BUB1	0.00312142	-0.0447653
202310_s_at	COL1A1	0.00315212	0.436238
208430_s_at	DTNA	0.00452208	0.0813422
216517_at	IGKC	0.00538132	-0.081705
204741_at	BICD1	0.00540212	-0.0872666
220327_at	VGLL3	0.00699204	-0.0598261
204530_s_at	TOX	0.00743636	-0.0499608
205279_s_at	GLRB	0.0077627	0.0603313
206201_s_at	MEOX2	0.00796803	0.0907362
203945_at	ARG2	0.00935893	-0.0898991
209991_x_at	GABBR2	0.0126246	-0.0962639
206336_at	CXCL6	0.0135794	-0.320044
214511_x_at	FCGR1B	0.0164622	0.120601
217028_at	CXCR4	0.0185418	-0.243406
209016_s_at	KRT7	0.0192453	-0.243874
220348_at	KLHL29	0.0288761	0.0574167
221126_at	DKK3	0.0301797	-0.0407031
214390_s_at	BCAT1	0.0305826	-0.0544246
215101_s_at	CXCL5	0.0417683	0.0708397
221127_s_at	DKK3	0.0525804	0.0872209
211164_at	EPHA3	0.0560443	-0.0323404
220580_at	BICC1	0.0706806	0.0843817
217428_s_at	COL10A1	0.0741944	-0.0632336
202285_s_at	TACSTD2	0.0861505	-0.0336619
214031_s_at	KRT7	0.0919718	-0.0331073
215217_at	IGKC	0.098604	0.0255606
210068_s_at	AQP4	0.1042	-0.0371394
205941_s_at	COL10A1	0.10668	-0.0764831
209437_s_at	SPON1	0.111066	-0.0405188
218186_at	RAB25	0.11353	-0.129213
221576_at	GDF15	0.115631	-0.0245271
211679_x_at	GABBR2	0.120409	0.0709202
211506_s_at	CXCL8	0.148182	0.124342
218730_s_at	OGN	0.148182	-0.0592598
216686_at	ANKRD36BP2	0.159565	-0.0259171
202196_s_at	DKK3	0.164454	0.106614
206796_at	WISP1	0.172885	-0.0285799
205193_at	MAFF	0.196748	0.088318
203001_s_at	STMN2	0.204891	-0.0668875
203789_s_at	SEMA3C	0.221381	0.0912971
201650_at	KRT19	0.235803	0.141726
221331_x_at	CTLA4	0.239523	-0.0253596
203000_at	STMN2	0.256071	-0.0754882
214247_s_at	DKK3	0.260926	-0.147214
205422_s_at	ITGBL1	0.262329	-0.102511
214452_at	BCAT1	0.265852	0.0313445
214105_at	SOCS3	0.289144	-0.0178902
220785_at	UTS2	0.310601	0.0271018
207152_at	NTRK2	0.377188	-0.0187691
216277_at	BUB1	0.48125	0.00993115
205267_at	POU2AF1	0.492594	-0.0576077
201842_s_at	EFEMP1	0.557784	-0.112349
207852_at	CXCL5	0.580358	0.0103832
205978_at	KL	0.580687	0.00999942
205816_at	ITGB8	0.649228	-0.00972997
210736_x_at	DTNA	0.65705	-0.0119921
206641_at	TNFRSF17	0.669196	-0.012707
210066_s_at	AQP4	0.68151	0.00793422
220784_s_at	UTS2	0.864237	0.00488566
206202_at	MEOX2	0.913467	0.00234895
207172_s_at	CDH11	0.913467	0.00459602
201843_s_at	EFEMP1	0.928238	0.0102898

## Sheet: GSE121248
Supplementary Table S8: Differentially expressed genes between HCC tumors and normal liver
ProbeID	Gene	Adjusted-p	Log fold change
219918_s_at	ASPM	5.21247e-23	3.31554
201292_at	TOP2A	5.35115e-23	3.27142
1555758_a_at	CDKN3	5.5313e-23	2.67576
201291_s_at	TOP2A	1.01792e-22	3.74092
222608_s_at	ANLN	2.06371e-22	2.96019
219787_s_at	ECT2	3.33349e-22	2.51697
201890_at	RRM2	5.26343e-22	3.03887
218009_s_at	PRC1	6.00162e-22	2.48193
209714_s_at	CDKN3	4.81089e-21	2.37975
204641_at	NEK2	4.81089e-21	2.67012
203477_at	COL15A1	6.13826e-21	3.23854
225655_at	UHRF1	4.32734e-20	2.09658
219148_at	PBK	5.51447e-20	2.73185
214710_s_at	CCNB1	6.85416e-20	2.44864
202705_at	CCNB2	1.111e-19	2.16122
218585_s_at	DTL	2.63967e-19	2.46497
209773_s_at	RRM2	7.91144e-19	2.48498
204162_at	NDC80	1.01475e-18	2.16987
236641_at	KIF14	1.24631e-18	1.96341
232238_at	ASPM	1.75339e-18	2.07155
201693_s_at	EGR1	2.39239e-18	-2.30312
218662_s_at	NCAPG	2.39239e-18	2.25714
203362_s_at	MAD2L1	2.50443e-18	2.25678
223381_at	NUF2	3.9556e-18	2.40798
222848_at	CENPK	3.98251e-18	1.97787
219990_at	E2F8	4.54607e-18	1.80443
218755_at	KIF20A	6.09992e-18	2.16464
228729_at	CCNB1	1.06754e-17	2.13121
218883_s_at	CENPU	1.23896e-17	2.17218
204822_at	TTK	1.98041e-17	2.07943
223700_at	MND1	2.05219e-17	1.55513
203764_at	DLGAP5	6.74181e-17	1.97025
204444_at	KIF11	7.49993e-17	1.71675
227350_at	HELLS	1.26544e-16	1.9539
209642_at	BUB1	1.68734e-16	1.94039
209374_s_at	IGHM	5.56111e-16	-2.27214
218663_at	NCAPG	6.1915e-16	2.01375
226980_at	DEPDC1B	1.04261e-15	1.72149
228033_at	E2F7	1.44151e-15	1.56594
204720_s_at	DNAJC6	1.62409e-15	1.69148
209220_at	GPC3	2.22827e-15	3.40462
206364_at	KIF14	6.37071e-15	1.31935
1552619_a_at	ANLN	1.08853e-14	1.49134
201694_s_at	EGR1	1.36027e-14	-1.80029
202422_s_at	ACSL4	1.37945e-14	3.01163
213226_at	CCNA2	1.68711e-14	1.43153
222680_s_at	DTL	2.99403e-14	1.16554
1554768_a_at	MAD2L1	3.32174e-14	1.33469
222958_s_at	DEPDC1	3.94843e-14	1.38366
209891_at	SPC25	4.18035e-14	1.50354
238756_at	GAS2L3	4.87393e-14	1.65334
239002_at	ASPM	5.80531e-14	1.49884
220295_x_at	DEPDC1	6.08871e-14	1.53028
220085_at	HELLS	7.90667e-14	1.70059
203968_s_at	CDC6	1.31215e-13	1.16705
203418_at	CCNA2	9.08517e-13	1.24624
223556_at	HELLS	9.11073e-13	1.15463
203967_at	CDC6	1.43305e-12	1.2448
225681_at	CTHRC1	5.31386e-12	2.75192
235545_at	DEPDC1	1.00125e-11	1.09061
225275_at	EDIL3	2.32535e-11	1.99902
227404_s_at	EGR1	3.00936e-11	-1.645
206632_s_at	APOBEC3B	4.43313e-11	1.65581
209772_s_at	CD24	1.01871e-10	1.33605
1568574_x_at	SPP1	2.70763e-10	1.4109
243243_at	GPC3	4.14408e-10	1.25954
232278_s_at	DEPDC1	4.20317e-10	0.924142
1557129_a_at	FAM111B	4.33385e-10	0.820431
227349_at	HELLS	5.5284e-10	0.688571
220651_s_at	MCM10	5.5284e-10	1.03235
202286_s_at	TACSTD2	5.72609e-10	-2.06264
225285_at	BCAT1	6.38541e-10	1.38506
229304_s_at	CENPU	9.17428e-10	0.517852
205342_s_at	SULT1C2	1.14197e-09	2.00112
211470_s_at	SULT1C2	1.25856e-09	2.31549
237469_at	TOP2A	1.68254e-09	0.58287
214669_x_at	IGKC	1.72102e-09	-1.75492
229305_at	CENPU	1.88112e-09	0.964308
218816_at	LRRC1	1.90352e-09	1.38127
209875_s_at	SPP1	2.93007e-09	2.49892
206360_s_at	SOCS3	4.30644e-09	-0.273621
222962_s_at	MCM10	6.46882e-09	0.823685
240349_at	PRKAA2	1.00872e-08	0.810984
223570_at	MCM10	1.0312e-08	0.767749
208650_s_at	CD24	1.3284e-08	2.11093
227084_at	DTNA	1.3284e-08	1.45881
226517_at	BCAT1	2.06885e-08	1.36112
214768_x_at	IGKC	2.90945e-08	-1.4924
211080_s_at	NEK2	3.23112e-08	0.617103
205476_at	CCL20	3.23112e-08	2.47799
238489_at	PRKAA2	3.50659e-08	0.523193
238441_at	PRKAA2	3.70627e-08	1.4996
221795_at	NTRK2	4.07692e-08	-0.436791
227892_at	PRKAA2	4.18936e-08	1.45706
225105_at	C12orf75	5.52674e-08	1.40719
221796_at	NTRK2	5.65285e-08	-1.12331
1557418_at	ACSL4	5.99824e-08	1.58294
219564_at	KCNJ16	6.37081e-08	-1.43026
221286_s_at	MZB1	6.46208e-08	-0.683089
206561_s_at	AKR1B10	7.4096e-08	2.87284
210519_s_at	NQO1	7.86288e-08	1.84504
225612_s_at	B3GNT5	7.92871e-08	1.33129
231964_at	BICD1	8.44063e-08	0.757005
217996_at	PHLDA1	8.78483e-08	-1.34308
235709_at	GAS2L3	8.87534e-08	0.838764
209293_x_at	ID4	9.25579e-08	-0.476459
235343_at	VASH2	1.91646e-07	1.10241
202311_s_at	COL1A1	2.03174e-07	1.59486
1557419_a_at	ACSL4	2.75509e-07	1.50623
1556051_a_at	BICD1	2.97452e-07	0.557935
242913_at	CLIC6	3.54013e-07	-0.298398
223484_at	C15orf48	3.55664e-07	1.55652
209291_at	ID4	3.58233e-07	-1.43225
205741_s_at	DTNA	3.8921e-07	0.773616
205343_at	SULT1C2	3.99246e-07	1.28061
217998_at	PHLDA1	4.63849e-07	-0.533708
203945_at	ARG2	4.92879e-07	-0.349468
227742_at	CLIC6	7.52957e-07	-0.972914
208592_s_at	CD1E	8.24892e-07	-0.247606
212092_at	PEG10	8.44705e-07	1.23384
214031_s_at	KRT7	9.96582e-07	-0.222585
238018_at	ALKAL2	1.01185e-06	-1.38724
1557128_at	FAM111B	1.37053e-06	0.408937
230830_at	SLC51B	1.67288e-06	1.05089
225842_at	PHLDA1	1.67288e-06	-1.05702
235048_at	FAM169A	2.05116e-06	1.08935
208651_x_at	CD24	2.58274e-06	1.29767
210091_s_at	DTNA	2.58274e-06	0.720624
1555745_a_at	LYZ	2.89668e-06	1.78292
208170_s_at	TRIM31	2.90134e-06	0.690577
212094_at	PEG10	2.9691e-06	2.29079
266_s_at	CD24	3.36666e-06	1.43364
209795_at	CD69	3.45014e-06	-1.22002
216517_at	IGKC	3.56002e-06	-0.414775
211835_at	IGKC	3.56002e-06	-0.267524
205043_at	CFTR	3.69519e-06	-1.32627
205044_at	GABRP	3.78838e-06	-1.04277
213975_s_at	LYZ	3.90591e-06	1.19748
217997_at	PHLDA1	5.10671e-06	-1.28344
210072_at	CCL19	5.59764e-06	-1.46148
1563010_at	ITGB8	6.37878e-06	-0.263877
201467_s_at	NQO1	6.44365e-06	1.22537
201468_s_at	NQO1	8.5956e-06	1.41512
238593_at	C11orf80	1.05381e-05	0.760694
227697_at	SOCS3	1.06468e-05	-1.31535
209771_x_at	CD24	1.08248e-05	1.28692
205267_at	POU2AF1	1.20934e-05	-1.20981
216379_x_at	CD24	1.25323e-05	1.28931
1553589_a_at	PDZK1IP1	1.45113e-05	1.28286
219630_at	PDZK1IP1	1.45113e-05	1.38668
217999_s_at	PHLDA1	1.45783e-05	-1.18363
226228_at	AQP4	1.58645e-05	-0.878882
202287_s_at	TACSTD2	1.68471e-05	-0.154972
211122_s_at	CXCL11	1.70312e-05	1.19359
242228_at	BICD1	1.77914e-05	0.353561
210611_s_at	DTNA	2.03698e-05	0.629816
227566_at	NTM	2.46888e-05	1.06831
218000_s_at	PHLDA1	2.60767e-05	-0.517005
210163_at	CXCL11	3.07054e-05	0.997499
202312_s_at	COL1A1	3.50495e-05	-0.209986
214806_at	BICD1	3.50495e-05	0.430189
1556134_a_at	B3GNT5	3.50495e-05	0.648042
206134_at	ADAMDEC1	4.61137e-05	0.862135
223949_at	TMPRSS3	4.95213e-05	0.768121
207709_at	PRKAA2	5.85876e-05	0.370871
219740_at	VASH2	6.03354e-05	0.497012
215444_s_at	TRIM31	6.03551e-05	0.486224
209990_s_at	GABBR2	7.1748e-05	0.965842
224404_s_at	FCRL5	7.42019e-05	-0.436619
229964_at	C9orf152	7.63873e-05	0.759209
206641_at	TNFRSF17	9.40564e-05	-0.797197
1559584_a_at	C16orf54	9.50722e-05	-0.953983
213954_at	FAM169A	0.000117517	0.873079
206201_s_at	MEOX2	0.000150401	0.688236
236312_at	MAD2L1	0.000154193	0.258144
240200_at	SULT1C2	0.000157295	0.361837
214452_at	BCAT1	0.000172273	0.490125
206070_s_at	EPHA3	0.00017364	-1.17587
235144_at	RASEF	0.000204856	1.05492
228885_at	MAMDC2	0.00021556	-0.635584
209436_at	SPON1	0.000226604	-0.52871
214777_at	IGKC	0.000246417	-1.02939
215217_at	IGKC	0.000247316	-0.16232
227614_at	HKDC1	0.000254076	1.01822
237625_s_at	IGKC	0.000257728	-0.641408
206071_s_at	EPHA3	0.000323344	-0.185118
1553986_at	RASEF	0.000352816	0.661847
244142_at	DTNA	0.000364692	0.221963
1554702_at	NALCN	0.000406984	-0.167255
204741_at	BICD1	0.000424537	0.21491
205978_at	KL	0.000432348	0.325843
205193_at	MAFF	0.000441295	-0.599768
216491_x_at	IGHM	0.000441295	-0.8003
224225_s_at	ETV7	0.000490353	0.354276
226933_s_at	ID4	0.000523522	-0.414733
218186_at	RAB25	0.000533151	-0.726482
223565_at	MZB1	0.00055157	-0.735218
227180_at	ELOVL7	0.00058686	0.937115
228082_at	CLMP	0.000745586	-0.214756
238778_at	MPP7	0.000748574	0.815278
201141_at	GPNMB	0.00077361	0.779062
226189_at	ITGB8	0.000902456	-0.987228
224405_at	FCRL5	0.00101572	-0.164277
1554020_at	BICD1	0.00114372	0.337818
209369_at	ANXA3	0.00124108	-0.731209
206359_at	SOCS3	0.00135205	-0.502927
229310_at	KLHL29	0.00136345	0.613499
202310_s_at	COL1A1	0.00145075	0.809907
212827_at	IGHM	0.00157827	-0.624949
216275_at	BUB1	0.00157827	-0.151553
1556499_s_at	COL1A1	0.0017762	0.804735
210159_s_at	TRIM31	0.00177936	0.292951
214974_x_at	CXCL5	0.00205258	1.17603
235600_at	DLK1	0.00205283	-0.200442
242982_x_at	ITGB8	0.00211052	-0.189853
203980_at	FABP4	0.00215267	0.857021
202285_s_at	TACSTD2	0.0021965	-0.123387
206336_at	CXCL6	0.00220801	-1.1743
1555799_at	FCRL5	0.00220801	-0.131802
222020_s_at	NTM	0.00235249	0.361896
228608_at	NALCN	0.00253626	-0.723594
223737_x_at	CHST9	0.00254673	-0.70269
211493_x_at	DTNA	0.00263782	0.142117
213993_at	SPON1	0.00270271	-0.407896
242880_at	NALCN	0.00272389	-0.13178
224406_s_at	FCRL5	0.00279217	-0.198979
228691_at	BICD1	0.00294095	-0.181856
228335_at	CLDN11	0.00298279	-0.862936
222901_s_at	KCNJ16	0.00332699	-0.187553
234040_at	HELLS	0.00335588	0.105587
243110_x_at	NPW	0.00345791	-0.999303
241934_at	NTM	0.00347561	-0.122027
213994_s_at	SPON1	0.00373016	-0.670806
228592_at	MS4A1	0.00391589	-0.784433
209292_at	ID4	0.00417655	-0.770571
1553186_x_at	RASEF	0.00417655	0.339395
1554842_at	SLC12A1	0.00420292	-0.18239
217026_at	CFTR	0.00437994	-0.119248
1556183_at	ANKRD36BP2	0.00437994	-0.36562
211312_s_at	WISP1	0.00457475	-0.16553
236179_at	CDH11	0.00464104	0.510724
206914_at	CRTAM	0.00484316	-0.353334
211146_at	IGKC	0.00496197	-0.084148
206060_s_at	PTPN22	0.00651294	-0.335627
1554018_at	GPNMB	0.00657492	0.659704
210066_s_at	AQP4	0.00657492	-0.100648
206908_s_at	CLDN11	0.00682591	-0.110216
234992_x_at	ECT2	0.00723921	0.168685
237323_at	HKDC1	0.00738015	0.186282
1553185_at	RASEF	0.00753293	0.319225
204922_at	C11orf80	0.00791788	0.210701
219895_at	TMEM255A	0.00848853	0.375872
1555092_at	VASH2	0.00850548	-0.176902
211164_at	EPHA3	0.00855221	-0.0689437
209016_s_at	KRT7	0.00862835	-0.686097
224400_s_at	CHST9	0.00898622	-0.610511
227399_at	VGLL3	0.0107679	0.617927
215101_s_at	CXCL5	0.011356	0.628845
209991_x_at	GABBR2	0.0124695	0.173052
214680_at	NTRK2	0.0127397	-0.133846
235978_at	FABP4	0.0137048	0.229439
220281_at	SLC12A1	0.0146773	0.586583
1553317_s_at	GPR82	0.0151375	-0.0784902
231647_s_at	FCRL5	0.0156246	-0.461882
236539_at	PTPN22	0.0167935	-0.359493
234994_at	TMEM200A	0.0170275	0.623086
214511_x_at	FCGR1B	0.0187253	0.422394
220585_at	HKDC1	0.0189517	0.166526
214345_at	EDIL3	0.0196598	-0.115881
208430_s_at	DTNA	0.0206172	0.145763
210906_x_at	AQP4	0.0207558	-0.103218
32128_at	CCL18	0.0217146	0.632524
215702_s_at	CFTR	0.0220105	-0.174811
220785_at	UTS2	0.022736	0.241483
225242_s_at	CCDC80	0.022736	0.634652
231376_at	UPP2	0.0227494	-0.839086
218963_s_at	KRT23	0.0231737	0.933451
201650_at	KRT19	0.0231737	-0.753857
217077_s_at	GABBR2	0.0239403	0.199389
211679_x_at	GABBR2	0.0240762	0.202181
221126_at	DKK3	0.0250674	-0.0862063
209803_s_at	PHLDA2	0.02527	0.764063
217418_x_at	MS4A1	0.0259949	-0.28481
220784_s_at	UTS2	0.0276443	0.290062
1564308_a_at	MPP7	0.027923	0.144307
231794_at	CTLA4	0.0282293	-0.123329
1552309_a_at	NEXN	0.0291843	-0.449665
237054_at	ENPP5	0.0318561	0.349306
234702_x_at	CFTR	0.0323654	-0.0703233
232764_at	CCNB2	0.0326035	-0.0938416
207173_x_at	CDH11	0.0351674	0.603883
226930_at	FNDC1	0.0364634	0.476527
227803_at	ENPP5	0.0441972	0.553357
1558972_s_at	THEMIS	0.046064	-0.306736
231418_at	MS4A1	0.0473663	-0.100503
222925_at	DCDC2	0.0485016	0.629199
217028_at	CXCR4	0.0498396	-0.465514
202936_s_at	SOX9	0.0501088	0.509576
1569040_s_at	ANKRD36BP2	0.051337	-0.489254
209924_at	CCL18	0.0527693	0.347043
229868_s_at	GDF15	0.0535336	-0.147391
237324_s_at	HKDC1	0.0537562	0.154845
205279_s_at	GLRB	0.0558413	0.168963
208010_s_at	PTPN22	0.0576686	-0.0791853
211488_s_at	ITGB8	0.0638823	-0.106913
226834_at	CLMP	0.0666802	-0.228806
205280_at	GLRB	0.0675017	0.393757
225016_at	APCDD1	0.0716402	-0.438497
1558393_at	KRT7	0.0748435	-0.087281
207790_at	LRRC1	0.0779544	0.152158
218723_s_at	RGCC	0.0779544	0.374031
217430_x_at	COL1A1	0.0799408	-0.0860842
203946_s_at	ARG2	0.0799408	0.400161
238451_at	MPP7	0.0822518	0.191649
202935_s_at	SOX9	0.0834664	0.528907
206202_at	MEOX2	0.0864212	-0.0451845
1564828_at	KIAA1211	0.0883571	-0.0756989
244747_at	NPNT	0.0888784	-0.115683
228491_at	KRT19	0.0919077	0.0968869
244680_at	GLRB	0.0936468	0.118107
224488_s_at	SPON1	0.0967248	-0.0723045
241725_at	E2F7	0.0967248	-0.084218
209437_s_at	SPON1	0.0967248	-0.0876369
205816_at	ITGB8	0.0967248	-0.0698137
1557080_s_at	ITGBL1	0.0967248	-0.483009
239827_at	RGCC	0.100808	-0.245817
217428_s_at	COL10A1	0.102597	0.299986
220475_at	SLC28A3	0.10344	-0.132713
214105_at	SOCS3	0.105617	-0.0770801
214927_at	ITGBL1	0.109614	-0.398139
232277_at	SLC28A3	0.110284	-0.265192
232768_at	CCNB2	0.111181	0.0925163
244434_at	GPR82	0.111993	-0.154169
203788_s_at	SEMA3C	0.116633	-0.0897113
225911_at	NPNT	0.117692	0.43831
216686_at	ANKRD36BP2	0.119599	-0.0518039
228599_at	MS4A1	0.121213	-0.109296
36711_at	MAFF	0.124305	-0.346652
204530_s_at	TOX	0.130632	-0.0772328
209560_s_at	DLK1	0.131446	0.604984
209201_x_at	CXCR4	0.131446	-0.296947
211919_s_at	CXCR4	0.133586	-0.310212
223948_s_at	TMPRSS3	0.133794	0.118132
210356_x_at	MS4A1	0.13419	-0.16898
1554835_a_at	B3GNT5	0.13419	0.0656301
226103_at	NEXN	0.136958	-0.374107
210068_s_at	AQP4	0.136958	-0.0867704
238439_at	ANKRD22	0.138345	0.260246
227128_s_at	TACSTD2	0.141122	-0.0850505
211506_s_at	CXCL8	0.141776	0.417362
207172_s_at	CDH11	0.142646	0.111865
236095_at	NTRK2	0.145905	-0.0579083
203000_at	STMN2	0.15093	-0.244365
207852_at	CXCL5	0.150938	0.12454
215703_at	CFTR	0.159108	-0.109841
234706_x_at	CFTR	0.167651	-0.0379543
220348_at	KLHL29	0.183433	0.100819
233155_at	UPP2	0.200543	-0.232066
220580_at	BICC1	0.205041	0.206774
1561969_at	ZPLD1	0.210065	0.176824
229386_at	ID4	0.230486	-0.058123
210736_x_at	DTNA	0.231892	0.0612936
201839_s_at	EPCAM	0.238509	-0.529273
223235_s_at	SMOC2	0.240797	0.315014
225241_at	CCDC80	0.267159	0.181194
1558971_at	THEMIS	0.267575	-0.121901
1554261_at	KLHL29	0.281082	-0.0517298
228193_s_at	RGCC	0.286454	0.087781
201843_s_at	EFEMP1	0.286857	0.379309
227194_at	FAM3B	0.289112	0.406746
243864_at	CCDC80	0.316707	0.0999557
214390_s_at	BCAT1	0.321079	0.0673393
239196_at	ANKRD22	0.321375	0.0928633
222926_at	DCDC2	0.341291	0.15434
243946_at	SMOC2	0.341291	0.0577542
221576_at	GDF15	0.349464	0.0596686
205941_s_at	COL10A1	0.35607	0.12513
243862_at	RASEF	0.386814	0.0306808
1569777_a_at	ZPLD1	0.401049	-0.0402851
1558394_s_at	KRT7	0.401049	0.0444757
229463_at	NTRK2	0.401049	-0.0340049
1554262_s_at	KLHL29	0.403836	0.0504917
204721_s_at	DNAJC6	0.403836	-0.0312701
213429_at	BICC1	0.412383	0.283374
221127_s_at	DKK3	0.4353	-0.156751
220327_at	VGLL3	0.438736	0.07654
207152_at	NTRK2	0.454282	-0.0361742
208011_at	PTPN22	0.464767	-0.0311487
221577_x_at	GDF15	0.464767	-0.190809
204529_s_at	TOX	0.467505	-0.143496
222722_at	OGN	0.486485	-0.165564
215784_at	CD1E	0.513372	-0.101387
205422_s_at	ITGBL1	0.520214	-0.195976
230508_at	DKK3	0.525476	-0.0820151
206796_at	WISP1	0.540108	-0.0382551
1553316_at	GPR82	0.55035	-0.0288465
228421_s_at	EFEMP1	0.55035	0.0381777
238149_at	ZNF818P	0.559586	0.0936308
207379_at	EDIL3	0.570426	-0.0340179
235821_at	WISP1	0.598593	0.0702515
218730_s_at	OGN	0.600032	-0.0755422
221331_x_at	CTLA4	0.616291	0.0255422
231993_at	ITGBL1	0.624816	-0.100916
237495_at	MPP7	0.661502	-0.0234597
215509_s_at	BUB1	0.661502	0.0227787
229802_at	WISP1	0.668309	0.116773
239286_at	CDH11	0.673863	0.0392143
209802_at	PHLDA2	0.673863	0.0278552
219121_s_at	ESRP1	0.674019	0.054333
237241_at	ECT2	0.678478	-0.0171096
220177_s_at	TMPRSS3	0.678478	0.0875215
221680_s_at	ETV7	0.678478	0.0299952
210067_at	AQP4	0.709506	-0.0135253
1558643_s_at	EDIL3	0.714896	0.0247811
203789_s_at	SEMA3C	0.743618	0.0757825
201842_s_at	EFEMP1	0.761816	0.114504
202196_s_at	DKK3	0.775908	0.0719472
238148_s_at	ZNF818P	0.776114	-0.0294981
216277_at	BUB1	0.782015	0.0117568
229494_s_at	PHLDA2	0.785866	-0.0148126
206291_at	NTS	0.795192	0.0963999
225846_at	ESRP1	0.799247	-0.0745406
227231_at	KIAA1211	0.817745	-0.0376139
214247_s_at	DKK3	0.849611	-0.0514984
215508_at	BUB1	0.849647	0.00701533
234362_s_at	CTLA4	0.8581	-0.00874946
203570_at	LOXL1	0.88632	0.0349271
234895_at	CTLA4	0.933163	-0.00447411
203001_s_at	STMN2	0.950518	0.0171544
236341_at	CTLA4	0.95145	0.00949963
227230_s_at	KIAA1211	0.952656	-0.0103512
1557079_at	ITGBL1	0.99135	0.00258912
202859_x_at	CXCL8	0.995287	-0.00276613
205242_at	CXCL13	0.998805	0.000580486
