# Supplementary material for: Transcriptomic Analysis of Hepatitis B Infected Liver for Prediction of Hepatocellular Carcinoma
Source: Biology (Basel). 2023 Jan 26;12(2):188. doi: 10.3390/biology12020188 (PMC9952979; doi:10.3390/biology12020188)
Supplement: Supplementary file 1 [file biology-12-00188-s001.zip › Supp. Table S9.xlsx]

## Sheet: Supp.table S9
Supplementary Table S9: Genes included in clusters 1-5
Cluster	Probeset ID	Gene Symbol	Alias	Full name
1	203872_at	ACTA1	ACTA	actin alpha 1, skeletal muscle [Source:HGNC Symbol;Acc:HGNC:129]
1	204631_at	MYH2	IBM3	myosin heavy chain 2 [Source:HGNC Symbol;Acc:HGNC:7572]
1	219106_s_at	KLHL41	KBTBD10	kelch like family member 41 [Source:HGNC Symbol;Acc:HGNC:16905]
1	208195_at	TTN	CMD1G	titin [Source:HGNC Symbol;Acc:HGNC:12403]
1	204810_s_at	CKM	CKMM	creatine kinase, M-type [Source:HGNC Symbol;Acc:HGNC:1994]
1	214087_s_at	MYBPC1	ssMyBP-C	myosin binding protein C1 [Source:HGNC Symbol;Acc:HGNC:7549]
1	209742_s_at	MYL2	CMH10	myosin light chain 2 [Source:HGNC Symbol;Acc:HGNC:7583]
1	204179_at	MB	PVALB	myoglobin [Source:HGNC Symbol;Acc:HGNC:6915]
1	209888_s_at	MYL1	MLC-1	myosin light chain 1 [Source:HGNC Symbol;Acc:HGNC:7582]
1	205374_at	SLN	MGC12301	sarcolipin [Source:HGNC Symbol;Acc:HGNC:11089]
1	219728_at	MYOT	LGMD1	myotilin [Source:HGNC Symbol;Acc:HGNC:12399]
1	205951_at	MYH1	MGC133384	myosin heavy chain 1 [Source:HGNC Symbol;Acc:HGNC:7567]
1	205388_at	TNNC2	CFAP85	troponin C2, fast skeletal type [Source:HGNC Symbol;Acc:HGNC:11944]
1	213201_s_at	TNNT1	ANM	troponin T1, slow skeletal type [Source:HGNC Symbol;Acc:HGNC:11948]
1	209904_at	TNNC1	TNNC	troponin C1, slow skeletal and cardiac type [Source:HGNC Symbol;Acc:HGNC:11943]
1	205553_s_at	CSRP3	CLP	cysteine and glycine rich protein 3 [Source:HGNC Symbol;Acc:HGNC:2472]
1	230195_at	LINC01405		long intergenic non-protein coding RNA 1405 [Source:HGNC Symbol;Acc:HGNC:50688]
1	205177_at	TNNI1		troponin I1, slow skeletal type [Source:HGNC Symbol;Acc:HGNC:11945]
1	239057_at	LMOD2		leiomodin 2 [Source:HGNC Symbol;Acc:HGNC:6648]
1	204865_at	CA3	CAIII	carbonic anhydrase 3 [Source:HGNC Symbol;Acc:HGNC:1374]
1	226864_at	PKIA	PRKACN1	cAMP-dependent protein kinase inhibitor alpha [Source:HGNC Symbol;Acc:HGNC:9017]
1	222919_at	TRDN	TRISK	triadin [Source:HGNC Symbol;Acc:HGNC:12261]
1	228794_at	XIRP2	CMYA3	xin actin binding repeat containing 2 [Source:HGNC Symbol;Acc:HGNC:14303]
1	206394_at	MYBPC2	fsMyBP-C	myosin binding protein C2 [Source:HGNC Symbol;Acc:HGNC:7550]
1	205577_at	PYGM	GSD5	glycogen phosphorylase, muscle associated [Source:HGNC Symbol;Acc:HGNC:9726]
1	235981_at	PPDPFL	C8orf22	pancreatic progenitor cell differentiation and proliferation factor like [Source:HGNC Symbol;Acc:HGNC:31745]
1	205444_at	ATP2A1	ATP2A	ATPase sarcoplasmic/endoplasmic reticulum Ca2+ transporting 1 [Source:HGNC Symbol;Acc:HGNC:811]
1	222287_at	TRDN	TRISK	triadin [Source:HGNC Symbol;Acc:HGNC:12261]
1	235503_at	ASB5		ankyrin repeat and SOCS box containing 5 [Source:HGNC Symbol;Acc:HGNC:17180]
1	203296_s_at	ATP1A2	FHM2	ATPase Na+/K+ transporting subunit alpha 2 [Source:HGNC Symbol;Acc:HGNC:800]
1	225894_at	SYNPO2	MYOPODIN	synaptopodin 2 [Source:HGNC Symbol;Acc:HGNC:17732]
1	1552732_at	ABRA	STARS	actin binding Rho activating protein [Source:HGNC Symbol;Acc:HGNC:30655]
1	244839_at	TTN	CMD1G	titin [Source:HGNC Symbol;Acc:HGNC:12403]
1	243346_at	LMOD3		leiomodin 3 [Source:HGNC Symbol;Acc:HGNC:6649]
1	236523_at	C4orf54	FOPV	chromosome 4 open reading frame 54 [Source:HGNC Symbol;Acc:HGNC:27741]
1	238079_at	TPM3	NEM1	tropomyosin 3 [Source:HGNC Symbol;Acc:HGNC:12012]
1	235261_at	UNC45B	CMYA4	unc-45 myosin chaperone B [Source:HGNC Symbol;Acc:HGNC:14304]
1	219804_at	SYNPO2L	FLJ12921	synaptopodin 2 like [Source:HGNC Symbol;Acc:HGNC:23532]
1	203862_s_at	ACTN2		actinin alpha 2 [Source:HGNC Symbol;Acc:HGNC:164]
1	213317_at	CLIC5	DFNB102	chloride intracellular channel 5 [Source:HGNC Symbol;Acc:HGNC:13517]
1	205295_at	CKMT2	SMTCK	creatine kinase, mitochondrial 2 [Source:HGNC Symbol;Acc:HGNC:1996]
1	204940_at	PLN	CMD1P	phospholamban [Source:HGNC Symbol;Acc:HGNC:9080]
1	204938_s_at	PLN	CMD1P	phospholamban [Source:HGNC Symbol;Acc:HGNC:9080]
1	204939_s_at	PLN	CMD1P	phospholamban [Source:HGNC Symbol;Acc:HGNC:9080]
1	213782_s_at	MYOZ2	C4orf5	myozenin 2 [Source:HGNC Symbol;Acc:HGNC:1330]
1	207148_x_at	MYOZ2	C4orf5	myozenin 2 [Source:HGNC Symbol;Acc:HGNC:1330]
1	210147_at	ART3	ARTC3	ADP-ribosyltransferase 3 (inactive) [Source:HGNC Symbol;Acc:HGNC:725]
1	235617_x_at	DWORF	NA	NA
1	207302_at	SGCG	A4	sarcoglycan gamma [Source:HGNC Symbol;Acc:HGNC:10809]
1	235004_at	RBM24	dJ259A10.1	RNA binding motif protein 24 [Source:HGNC Symbol;Acc:HGNC:21539]
1	219645_at	CASQ1	CASQ	calsequestrin 1 [Source:HGNC Symbol;Acc:HGNC:1512]
1	231051_at	MRLN	Linc-RAM	myoregulin [Source:HGNC Symbol;Acc:HGNC:48649]
1	219926_at	POPDC3	bA355M14.1	popeye domain containing 3 [Source:HGNC Symbol;Acc:HGNC:17649]
1	213371_at	LDB3	CMD1C	LIM domain binding 3 [Source:HGNC Symbol;Acc:HGNC:15710]
1	206121_at	AMPD1	MAD	adenosine monophosphate deaminase 1 [Source:HGNC Symbol;Acc:HGNC:468]
1	203863_at	ACTN2		actinin alpha 2 [Source:HGNC Symbol;Acc:HGNC:164]
1	1552791_a_at	TRDN	TRISK	triadin [Source:HGNC Symbol;Acc:HGNC:12261]
1	230331_at	METTL21C	C13orf39	methyltransferase 21C, AARS1 lysine [Source:HGNC Symbol;Acc:HGNC:33717]
1	213764_s_at	MFAP5	MAGP2	microfibril associated protein 5 [Source:HGNC Symbol;Acc:HGNC:29673]
2	204409_s_at	EIF1AY		eukaryotic translation initiation factor 1A Y-linked [Source:HGNC Symbol;Acc:HGNC:3252]
2	204410_at	EIF1AY		eukaryotic translation initiation factor 1A Y-linked [Source:HGNC Symbol;Acc:HGNC:3252]
2	205000_at	DDX3Y	DBY	DEAD-box helicase 3 Y-linked [Source:HGNC Symbol;Acc:HGNC:2699]
2	201909_at	RPS4Y1	MGC119100	ribosomal protein S4 Y-linked 1 [Source:HGNC Symbol;Acc:HGNC:10425]
2	207063_at	TTTY14	CYorf14	testis-specific transcript, Y-linked 14 [Source:HGNC Symbol;Acc:HGNC:18495]
2	236694_at	TXLNGY	CYorf15A	taxilin gamma pseudogene, Y-linked [Source:HGNC Symbol;Acc:HGNC:18473]
2	205001_s_at	DDX3Y	DBY	DEAD-box helicase 3 Y-linked [Source:HGNC Symbol;Acc:HGNC:2699]
2	230760_at	ZFY	ZNF911	zinc finger protein Y-linked [Source:HGNC Symbol;Acc:HGNC:12870]
2	228492_at	USP9Y	AZFA	ubiquitin specific peptidase 9 Y-linked [Source:HGNC Symbol;Acc:HGNC:12633]
2	206700_s_at	KDM5D	HY	lysine demethylase 5D [Source:HGNC Symbol;Acc:HGNC:11115]
2	223646_s_at	TXLNGY	CYorf15A	taxilin gamma pseudogene, Y-linked [Source:HGNC Symbol;Acc:HGNC:18473]
2	223645_s_at	TXLNGY	CYorf15A	taxilin gamma pseudogene, Y-linked [Source:HGNC Symbol;Acc:HGNC:18473]
2	206624_at	USP9Y	AZFA	ubiquitin specific peptidase 9 Y-linked [Source:HGNC Symbol;Acc:HGNC:12633]
2	214131_at	TXLNGY	CYorf15A	taxilin gamma pseudogene, Y-linked [Source:HGNC Symbol;Acc:HGNC:18473]
2	201117_s_at	CPE		carboxypeptidase E [Source:HGNC Symbol;Acc:HGNC:2303]
2	206484_s_at	XPNPEP2		X-prolyl aminopeptidase 2 [Source:HGNC Symbol;Acc:HGNC:12823]
3	243689_s_at	FRG1BP	bA348I14.2	FSHD region gene 1 family member B, pseudogene [Source:HGNC Symbol;Acc:HGNC:15792]
3	1562527_at	LOC441666		Zinc Finger Protein 91 Pseudogene
3	211565_at	SH3GL3	CNSA3	SH3 domain containing GRB2 like 3, endophilin A3 [Source:HGNC Symbol;Acc:HGNC:10832]
3	227952_at	ZNF595	FLJ31740	zinc finger protein 595 [Source:HGNC Symbol;Acc:HGNC:27196]
3	1558496_at	LINC02053		long intergenic non-protein coding RNA 2053 [Source:HGNC Symbol;Acc:HGNC:52893]
3	220771_at	LINC00328		Long Intergenic Non-Protein Coding RNA 328
3	1553886_at	CFAP65	CCDC108	cilia and flagella associated protein 65 [Source:HGNC Symbol;Acc:HGNC:25325]
3	211585_at	NPAT	E14	nuclear protein, coactivator of histone transcription [Source:HGNC Symbol;Acc:HGNC:7896]
3	1554816_at	ASTN2	KIAA0634	astrotactin 2 [Source:HGNC Symbol;Acc:HGNC:17021]
3	233075_at	HERC2P7		HERC2 pseudogene 7 [Source:HGNC Symbol;Acc:HGNC:4875]
3	204913_s_at	SOX11		SRY-box transcription factor 11 [Source:HGNC Symbol;Acc:HGNC:11191]
3	1556834_at	DSG2-AS1		DSG2 antisense RNA 1 [Source:HGNC Symbol;Acc:HGNC:51311]
3	242881_x_at	DUXAP10		double homeobox A pseudogene 10 [Source:NCBI gene (formerly Entrezgene);Acc:503639]
3	1562337_at	OR7D2	FLJ38149	olfactory receptor family 7 subfamily D member 2 [Source:HGNC Symbol;Acc:HGNC:8378]
4	220313_at	GPR88		G protein-coupled receptor 88 [Source:HGNC Symbol;Acc:HGNC:4539]
4	1555538_s_at	FAM9B	TEX39B	family with sequence similarity 9 member B [Source:HGNC Symbol;Acc:HGNC:18404]
4	207308_at	SLCO1A2	OATP	solute carrier organic anion transporter family member 1A2 [Source:HGNC Symbol;Acc:HGNC:10956]
4	214079_at	DHRS2	HEP27	dehydrogenase/reductase 2 [Source:HGNC Symbol;Acc:HGNC:18349]
4	218468_s_at	GREM1	CKTSF1B1	gremlin 1, DAN family BMP antagonist [Source:HGNC Symbol;Acc:HGNC:2001]
4	218469_at	GREM1	CKTSF1B1	gremlin 1, DAN family BMP antagonist [Source:HGNC Symbol;Acc:HGNC:2001]
4	238835_at	AVPR1A	AVPR1	arginine vasopressin receptor 1A [Source:HGNC Symbol;Acc:HGNC:895]
4	242680_at	AVPR1A	AVPR1	arginine vasopressin receptor 1A [Source:HGNC Symbol;Acc:HGNC:895]
4	207406_at	CYP7A1	CYP7	cytochrome P450 family 7 subfamily A member 1 [Source:HGNC Symbol;Acc:HGNC:2651]
4	1557832_at	LOC101926960		long intergenic non-protein coding RNA 2996
4	1556167_at	MROH2A	HEATR7B1	maestro heat like repeat family member 2A [Source:HGNC Symbol;Acc:HGNC:27936]
4	1556168_s_at	MROH2A	HEATR7B1	maestro heat like repeat family member 2A [Source:HGNC Symbol;Acc:HGNC:27936]
4	205669_at	NCAM2	MGC51008	neural cell adhesion molecule 2 [Source:HGNC Symbol;Acc:HGNC:7657]
4	239380_at	LINC01554	C5orf27	long intergenic non-protein coding RNA 1554 [Source:HGNC Symbol;Acc:HGNC:24687]
5	236696_at	U2SURP	fSAPa	U2 snRNP associated SURP domain containing [Source:HGNC Symbol;Acc:HGNC:30855]
5	236207_at	SSFA2	ITPRID2	ITPR-Interacting Domain-Containing Protein 2 [Source:HGNC Symbol;Acc:HGNC:11319]
5	237086_at	FOXA1	HNF3A	forkhead box A1 [Source:HGNC Symbol;Acc:HGNC:5021]
5	243589_at	KANSL1	CENP-36	KAT8 regulatory NSL complex subunit 1 [Source:HGNC Symbol;Acc:HGNC:24565]
5	235409_at	MGA	FLJ12634	MAX dimerization protein MGA [Source:HGNC Symbol;Acc:HGNC:14010]
5	1557267_s_at	GEN1	FLJ40869	GEN1 Holliday junction 5' flap endonuclease [Source:HGNC Symbol;Acc:HGNC:26881]
5	235009_at	BOD1L1	BOD1L	biorientation of chromosomes in cell division 1 like 1 [Source:HGNC Symbol;Acc:HGNC:31792]
5	242163_at	THRAP3	BCLAF2	thyroid hormone receptor associated protein 3 [Source:HGNC Symbol;Acc:HGNC:22964]
5	240246_at	FRG1JP		FSHD region gene 1 family member J, pseudogene [Source:HGNC Symbol;Acc:HGNC:51768]
5	236386_at	SUZ12P1	SUZ12P	SUZ12 pseudogene 1 [Source:HGNC Symbol;Acc:HGNC:32421]
5	231628_s_at	SERPINB6	CAP	serpin family B member 6 [Source:HGNC Symbol;Acc:HGNC:8950]
5	1565947_a_at	CHML	REP-2	CHM like Rab escort protein [Source:HGNC Symbol;Acc:HGNC:1941]
5	236316_at	FAM3C	GS3876	FAM3 metabolism regulating signaling molecule C [Source:HGNC Symbol;Acc:HGNC:18664]
5	236223_s_at	RIT1	MGC125864	Ras like without CAAX 1 [Source:HGNC Symbol;Acc:HGNC:10023]
5	243463_s_at	RIT1	MGC125864	Ras like without CAAX 1 [Source:HGNC Symbol;Acc:HGNC:10023]
5	229648_at	ARHGAP32	GC-GAP	Rho GTPase activating protein 32 [Source:HGNC Symbol;Acc:HGNC:17399]
5	1569484_s_at	MDN1	KIAA0301	midasin AAA ATPase 1 [Source:HGNC Symbol;Acc:HGNC:18302]
5	1560469_at	NR5A2	B1F2	nuclear receptor subfamily 5 group A member 2 [Source:HGNC Symbol;Acc:HGNC:7984]
5	1566528_at	CUX2	CDP2	cut like homeobox 2 [Source:HGNC Symbol;Acc:HGNC:19347]
