# Supplementary material for: Transcriptomic Analysis of Hepatitis B Infected Liver for Prediction of Hepatocellular Carcinoma
Source: Biology (Basel). 2023 Jan 26;12(2):188. doi: 10.3390/biology12020188 (PMC9952979; doi:10.3390/biology12020188)
Supplement: Supplementary file 1 [file biology-12-00188-s001.zip › Supp. Table S10.xlsx]

## Sheet: protein atlas
Supplementary Table S10: Immunohistochemical evaluation of PCM1
Gene--Antibody (clone):	ACSL4--HPA005552				RRM2--HPA056994				NEK2--CAB017530				KIF20A-- HPA036909				NCAPG--HPA039613				TTK--CAB013229				AKR1B10--HPA020280				PEG10--HPA029915				SULT1C2--HPA007190				COL15A1--HPA017913				CD24--CAB078471				SPP1--HPA027541				NQO1--HPA007308
	Tumor		Normal		Tumor		Normal		Tumor		Normal		Tumor		Normal		Tumor		Normal		Tumor		Normal		Tumor		Normal		Tumor		Normal		Tumor		Normal		Tumor		Normal		Tumor		Normal		Tumor		Normal		Tumor
Sample Nr.*	percentage	intensity	percentage	intensity	percentage	intensity	percentage	intensity	percentage	intensity	percentage	intensity	percentage	intensity	percentage	intensity	percentage	intensity	percentage	intensity	percentage	intensity	percentage	intensity	percentage	intensity	percentage	intensity	percentage	intensity	percentage	intensity	percentage	intensity	percentage	intensity	percentage	intensity	percentage	intensity	percentage	intensity	percentage	intensity	percentage	intensity	percentage	intensity	percentage
1	1	1	0	0	20	1	0	0	0	0	0	0	5	3	0	0	80	2	15	2	0	0	0	0	85	3	1	2	25	2	10	1	10	1	0	0	25	1	10	1	30	1	45	1	15	3	1	2	90
2	100	3	0	0	1	2	0	0	0	0	0	0	10	2	0	0	40	2	5	1	10	3	0	0	25	3	0	0	65	2	3	1	0	0	5	1	20	1	0	0	25	1	65	1	0	0	0	0	0
3	5	2	1	2	2	1	0	0	0	0	0	0	5	3			10	1	10	2	5	1	0	0	1	1	0	0	10	2	0	0	0	0	0	0	5	1	0	0	10	1	50	1	10	2	0	0	0
4	90	2			2	1			0	0			10	2			55	1			5	2			95	3			10	2			0	0			5	2			30	2			10	3			0
5	20	2			0	0			0	0			5	3			50	1			10	3			80	3			1	1							0	0			10	1			0	0			0
6									0	0			3	2			20	1			5	1			100	3			30	1							0	0			5	1			5	1			0
7									0	0							15	1							50	3			20	1							0	0			15	2			3	1
8									5	1							30	1							60	3
9																	40	1
* Samples are from distinct patients for each staining
[truncated: 19 more columns]
